# Supplementary material for: 2,3-Difunctionalization of quinones: a gold-catalyzed cascade approach for trifluoromethyl-amination or sulfoximination
Source: Royal Society of Chemistry journal article supplement (doi:10.1039/d4cc01891e), 2024-01-01
Supplement: d4cc01891e1.pdf [file d4cc01891e1.pdf]

# Supporting Information

## **2,3-Difunctionalization of Quinones: A Gold-Catalyzed Cascade Approach for Trifluoromethyl-Amination or Sulfoximation**

Alpa Sharma,<sup>a,c</sup> Vijaya Govande,<sup>a</sup> Shivangani Mahajan<sup>a,c</sup> and Sanghapal D. Sawant<sup>\*abc</sup>

<sup>a</sup> Natural Products and Medicinal Chemistry Division, CSIR-Indian Institute of Integrative Medicine, Canal Road, Jammu-180001 (UT of J&K), India

<sup>b</sup> Organic Chemistry Division, CSIR-National Chemical Laboratory, Dr. Homi Bhabha Road, Pune-411008

<sup>c</sup> Academy of Scientific and Innovative Research, Ghaziabad-201002 (Uttar Pradesh), India



## Content

|                                                                                                                   |                   |
|-------------------------------------------------------------------------------------------------------------------|-------------------|
| <b>1. General experimental section</b>                                                                            | <b>S3</b>         |
| <b>2. General experimental procedures</b>                                                                         | <b>S3 - S4</b>    |
| <b>3. Optimization Studies</b>                                                                                    | <b>S4 – S6</b>    |
| <b>4. Figure for Mutual Activation of Togni 1 and Sulfoximine</b>                                                 | <b>S7</b>         |
| <b>5. Figure: Job's Plot</b>                                                                                      | <b>S7</b>         |
| <b>6. Figure of XPS spectra</b>                                                                                   | <b>S7</b>         |
| <b>7. Physical and Spectroscopic Characterization</b>                                                             | <b>S8 – S22</b>   |
| <b>Data of Compounds</b>                                                                                          |                   |
| <b>8. <math>^1\text{H}</math> and <math>^{13}\text{C}</math> <math>\{^1\text{H}\}</math> NMR and HRMS Spectra</b> | <b>S23 – S145</b> |
| <b>9. XPS Spectra (complete data)</b>                                                                             | <b>S146-S149</b>  |
| <b>10. X-ray spectral data</b>                                                                                    | <b>S150</b>       |

### General experimental section:

All reactions were performed in oven-dried glass apparatus. Solvents were distilled in the standard way, and commercial reagents were used without any purification. Analytical TLC was performed on 60 F254 plates and visualized by exposure to ultraviolet light (UV-254 nm). Column chromatography was carried out with silica gel (100-200 and 200-400 mesh) and basic alumina. NMR spectra for characterization of compounds were recorded on Bruker Advance DPX FT-NMR 400 MHz instrument ( $^1\text{H}$ , 2D,  $^1\text{H}$ - $^1\text{H}$ -COSY and  $^1\text{H}$ - $^{13}\text{C}$  HMBC, HMQC, and NOESY) at 400 MHz and ( $^{13}\text{C}$ ) at 100 MHz respectively.  $^{19}\text{F}$  NMR were recorded at 376 MHz. Chemical shifts ( $\delta$ ) are reported in ppm, using the residual solvent peak in  $\text{CDCl}_3$  ( $\delta\text{H} = 7.26$  and  $\delta\text{C} = 77.16$  ppm) as internal reference and coupling constants (J) are given in hertz (Hz). The following abbreviations were used to explain the multiplicities: s = singlet, d = doublet, t = triplet, q = quartet, m = multiplet. High-Resolution Mass Spectra (HRMS) were recorded using Waters XEVO-G2-XS-Q-TOF mass spectrometer.

### General Procedure for the synthesis of trifluoromethyl aminated derivatives

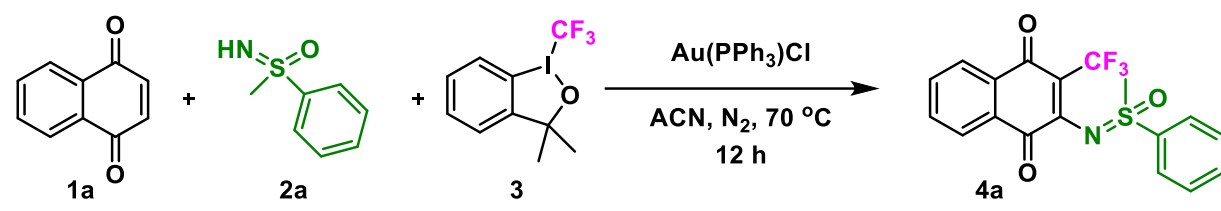

To an oven dried Schlenk tube equipped with a magnetic stir bar, was added quinone **1** (0.32 mmol, 1.0 equiv), amine/sulfoximine **2a** (0.32 mmol, 1.0 equiv), Togni reagent **3** (0.63 mmol, 2.0 equiv),  $\text{Au}(\text{PPh}_3)\text{Cl}$  (10 mol%) and sealed with a septum, and degassed by alternating vacuum evacuation and nitrogen backfill (three times) before acetonitrile (5 mL) was added. The reaction was then stirred at  $70^\circ\text{C}$  for 12 h. After the reaction was complete, the solvent was removed under reduced



pressure with rotary evaporator. The crude residue was purified by silica gel column chromatography to afford pure product.

### General Procedure for the synthesis of sulfoximines

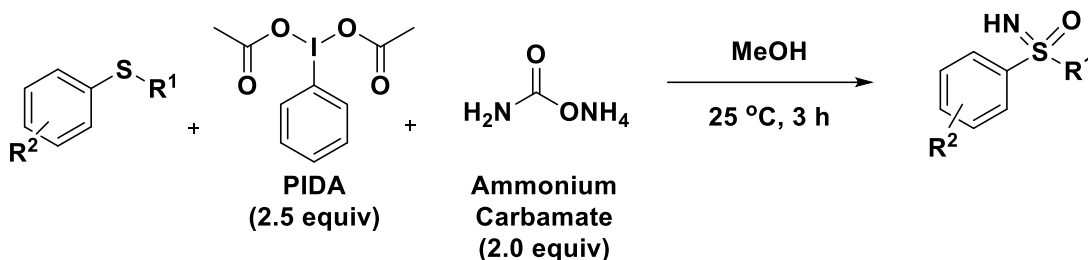

The sulfide (1 equiv), phenyliodine(III)diacetate (PIDA) (2.5 equiv) and ammonium carbamate (2.0 equiv) were added to a flask containing a stirrer bar. MeOH was added to it and the reaction was allowed to stir at 25 °C for 3 h. After the indicated reaction time, the solvent was removed under reduced pressure and purified by column chromatography which afforded the sulfoximine product.

### Optimization of the Reaction Conditions

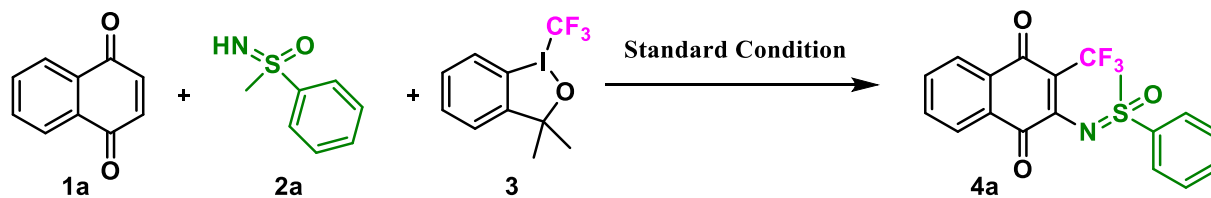

#### a) Table S1. Examination of Metal Catalysts other than Gold

| S No. | Metal Catalyst                        | Solvent | Isolated Yield (%) of 4a |
|-------|---------------------------------------|---------|--------------------------|
| 1     | -                                     | ACN     | NR                       |
| 2     | CuI                                   | ACN     | 7                        |
| 3     | CuBr                                  | ACN     | 13                       |
| 4     | Cu(MeCN) <sub>4</sub> PF <sub>6</sub> | ACN     | 48                       |

|    |                                         |            |           |
|----|-----------------------------------------|------------|-----------|
| 5  | Cu(MeCN) <sub>4</sub> BF <sub>4</sub>   | ACN        | 42        |
| 6  | Cu(OAc) <sub>2</sub> · H <sub>2</sub> O | ACN        | NR        |
| 7  | FeCl <sub>3</sub>                       | ACN        | NR        |
| 8  | Pd(OAc) <sub>2</sub>                    | ACN        | 37        |
| 9  | <b>Au(PPh<sub>3</sub>)Cl</b>            | <b>ACN</b> | <b>72</b> |
| 10 | Cu(OTf) <sub>2</sub>                    | ACN        | 39        |

**b) Table S2. Examination of Different Solvents**

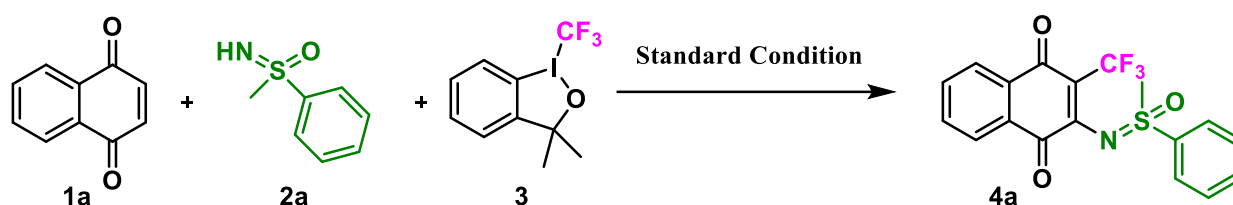

| S No.     | Metal Catalyst               | Solvent           | Isolated Yield (%) of 4a |
|-----------|------------------------------|-------------------|--------------------------|
| 1         | Au(PPh <sub>3</sub> )Cl      | THF               | 36                       |
| 2         | Au(PPh <sub>3</sub> )Cl      | DMSO              | NR                       |
| 3         | Au(PPh <sub>3</sub> )Cl      | DMF               | NR                       |
| 4         | Au(PPh <sub>3</sub> )Cl      | MeOH              | trace                    |
| 5         | Au(PPh <sub>3</sub> )Cl      | t-BuOH            | trace                    |
| <b>6</b>  | Au(PPh <sub>3</sub> )Cl      | EtOH              | trace                    |
| 7         | Au(PPh <sub>3</sub> )Cl      | Chlorobenzene     | NR                       |
| 8         | Au(PPh <sub>3</sub> )Cl      | CDCl <sub>3</sub> | 53                       |
| 9         | Au(PPh <sub>3</sub> )Cl      | Toluene           | NR                       |
| <b>10</b> | <b>Au(PPh<sub>3</sub>)Cl</b> | <b>ACN</b>        | <b>72</b>                |
| 11        | Au(PPh <sub>3</sub> )Cl      | DCM               | 47                       |
| 12        | Au(PPh <sub>3</sub> )Cl      | DCE               | 24                       |

c) Table S3: Examination of different reaction temperatures

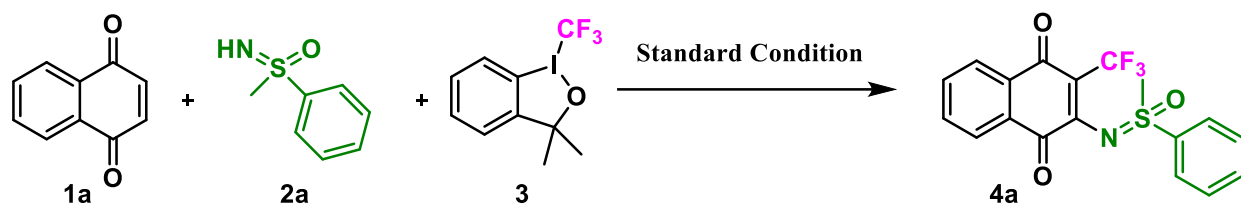

| S No. | Temperature (° C) | Isolated Yield (%) of 4a |
|-------|-------------------|--------------------------|
| 1     | RT                | NR                       |
| 2     | 40                | NR                       |
| 3     | 70                | 72                       |
| 4     | 85                | 57                       |

d) Table S4: Examination of various trifluoromethylating agents

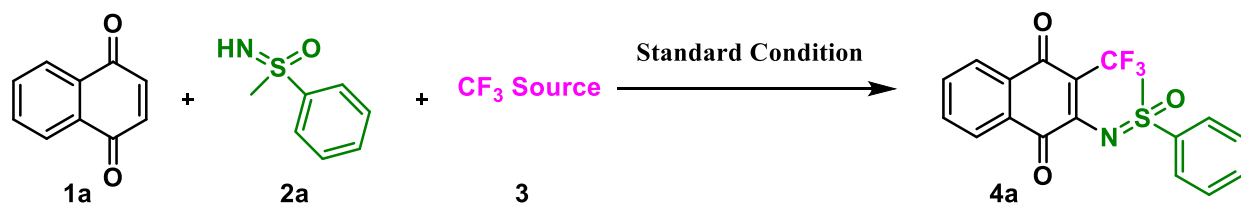

| S No. | CF <sub>3</sub> Reagents                                                  | Isolated Yield (%) of 4a |
|-------|---------------------------------------------------------------------------|--------------------------|
| 1     | Togni I reagent (1-Trifluoromethyl-3,3-dimethyl-1,2-benziodoxole)         | 72                       |
| 2     | Togni II reagent (1-Trifluoromethyl-1,2-benziodoxol-3-(1H)-on)            | 15                       |
| 3     | Umemoto reagent (5-(Trifluoromethyl)dibenzothiophenium tetrafluoroborate) | 24                       |

## Togni 1 and Sulfoximine Mutual Activation

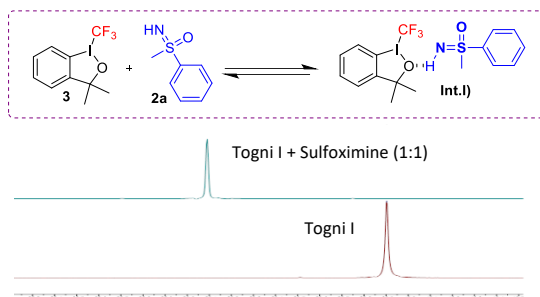

Figure S1: Chemical Shift in  $^{19}\text{F}$  NMR of Togni I (alone) and Togni I with Sulfoximine

## Job's Plot

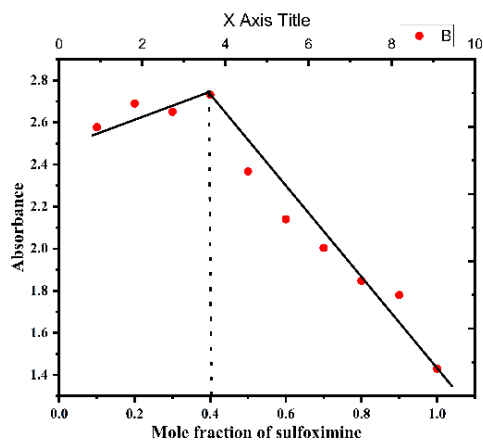

Figure S2: Job's Plot to determine the binding stoichiometry between Togni I and sulfoximine

## XPS Spectra

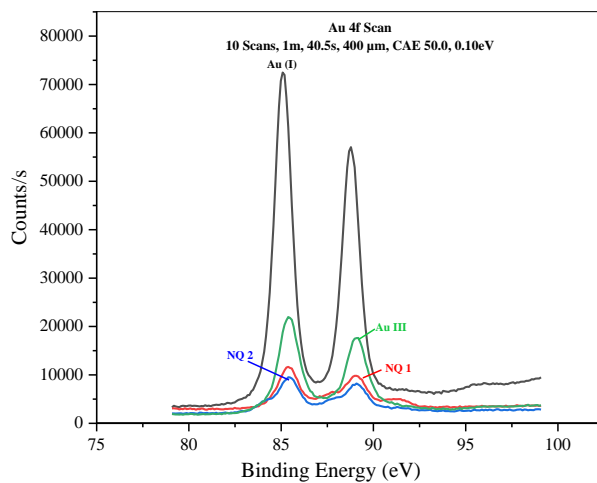

Figure S3: XPS spectra of Au(I), Au (III), NQ-1 (reaction aliquot after 3h) and NQ-2 (reaction aliquot after 6h)

## Physical and Spectroscopic Characterization Data of Compounds:

### 2-((methyl(oxo)(phenyl)- $\lambda^6$ -sulfaneylidene)amino)-3-(trifluoromethyl)naphthalene-1,4-dione (**4a**)

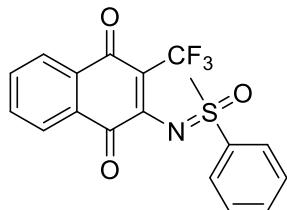

The compound **4a** was purified by column chromatography on silica gel (Eluent: EtOAc/Hexane = 2/8), 86.35 mg, 72% yield; yellow solid.

**$^1\text{H}$  NMR (400 MHz,  $\text{CDCl}_3$ ):**  $\delta$  8.13 – 8.09 (m, 1H), 8.03 – 7.98 (m, 2H), 7.95 – 7.92 (m, 1H), 7.74 (m, 1H), 7.67 – 7.59 (m, 4H), 3.41 (s, 3H).

**$^{19}\text{F}$  NMR (377 MHz,  $\text{CDCl}_3$ ):**  $\delta$  -57.30 (s, 3F).

**$^{13}\text{C}$  { $^1\text{H}$ } NMR (151 MHz,  $\text{CDCl}_3$ ):**  $\delta$  180.8, 180.3, 150.4, 141.3, 141.2, 135.1, 133.4, 132.9, 132.6, 129.7, 129.6, 127.5, 127.0, 126.9, 126.6, 126.3, 126.3, 126.2, 123.9 (q,  $J = 276.3$  Hz), 116.8 (q,  $J = 27.2$  Hz), 49.5.

**HRMS (ESI)  $m/z$ :**  $[\text{M}+\text{H}]^+$  Calcd. For  $\text{C}_{18}\text{H}_{13}\text{F}_3\text{NO}_3\text{S}$ : 380.0568; found: 380.0566.

### 2-(((3-bromophenyl)(methyl)(oxo)- $\lambda^6$ -sulfaneylidene)amino)-3-(trifluoromethyl)naphthalene-1,4-dione (**4b**)

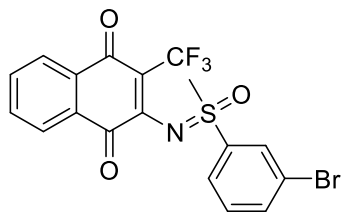

The compound **4b** was purified by column chromatography on silica gel (Eluent: EtOAc/Hexane = 1/9), 101.45 mg, 70% yield; yellow solid.

**$^1\text{H}$  NMR (400 MHz,  $\text{CDCl}_3$ ):**  $\delta$  8.16 (t,  $J = 1.8$  Hz, 1H), 8.12 (d,  $J = 7.7$  Hz, 1H), 7.95 (d,  $J = 7.7$  Hz, 1H), 7.92-7.89 (m, 1H), 7.79 – 7.73 (m, 2H), 7.64 (td,  $J = 7.6, 1.0$  Hz, 1H), 7.48 (t,  $J = 8.0$  Hz, 1H), 3.41 (s, 3H).

**$^{19}\text{F}$  NMR (377 MHz,  $\text{CDCl}_3$ ):**  $\delta$  -57.31 (s, 3F).

$^{13}\text{C}$   $\{^1\text{H}\}$  NMR (101 MHz,  $\text{CDCl}_3$ ):  $\delta$  180.8, 180.3, 149.8, 143.2, 136.4, 135.3, 133.0, 132.6, 131.2, 129.5, 129.3, 127.03, 126.6, 124.8, 124.5 (q,  $J = 282.8$  Hz), 123.7, 117.2 (q,  $J = 26.4$  Hz), 49.4.

HRMS (ESI)  $m/z$ :  $[\text{M}+\text{H}]^+$  Calcd. For  $\text{C}_{18}\text{H}_{14}\text{NO}_3\text{F}_3\text{SBr}$ : 459.9830; found: 459.9837.

**2-((methyl(oxo)(pyridin-4-yl)- $\lambda^6$ -sulfaneylidene)amino)-3-(trifluoromethyl)naphthalene-1,4-dione (4c)**

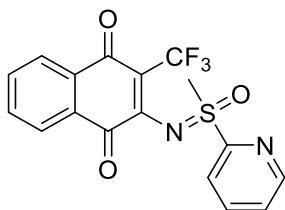

The compound **4c** was purified by column chromatography on silica gel (Eluent: EtOAc/Hexane = 2/8), 87.78 mg, 73% yield; yellow solid.

$^1\text{H}$  NMR (400 MHz,  $\text{CDCl}_3$ ):  $\delta$  8.71 – 8.67 (m, 1H), 8.38 (d,  $J = 8.0$  Hz, 1H), 8.10 (dd,  $J = 7.8$ , 0.8 Hz, 1H), 8.06 (td,  $J = 7.8$ , 1.7 Hz, 1H), 7.94 (dd,  $J = 7.7$ , 0.9 Hz, 1H), 7.75 (td,  $J = 7.6$ , 1.3 Hz, 1H), 7.63 (td,  $J = 7.6$ , 1.2 Hz, 1H), 7.58 – 7.55 (m, 1H), 3.56 (s, 3H).

$^{19}\text{F}$  NMR (377 MHz,  $\text{CDCl}_3$ ):  $\delta$  -57.01 (s, 3F).

$^{13}\text{C}$   $\{^1\text{H}\}$  NMR (101 MHz,  $\text{CDCl}_3$ ):  $\delta$  181.2, 180.5, 158.9, 150.0, 138.7, 135.3, 133.1, 132.8, 129.7, 127.2, 127.0, 126.7, 123.4 (d,  $J = 280.7$  Hz), 122.2, 117.1 (q,  $J = 26.5$  Hz), 45.1.

HRMS (ESI)  $m/z$ :  $[\text{M}+\text{H}]^+$  Calcd. For  $\text{C}_{17}\text{H}_{12}\text{N}_2\text{O}_3\text{F}_3\text{S}$ : 381.0521; found: 381.0524.

**2-(((3-chlorophenyl)(methyl)(oxo)- $\lambda^6$ -sulfaneylidene)amino)-3-(trifluoromethyl)naphthalene-1,4-dione (4d)**

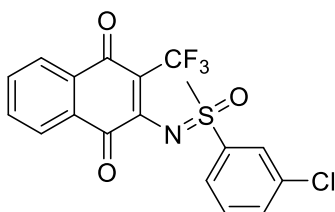

The compound **4d** was purified by column chromatography on silica gel (Eluent: EtOAc/Hexane = 1/9), 98.02 mg, 75% yield; yellow solid.

**<sup>1</sup>H NMR (400 MHz, CDCl<sub>3</sub>):** δ 8.12 (d, *J* = 7.8 Hz, 1H), 8.00 (t, *J* = 1.9 Hz, 1H), 7.95 (d, *J* = 7.6 Hz, 1H), 7.88-7.85 (m, 1H), 7.78-7.74 (m, 1H), 7.66 – 7.61 (m, 2H), 7.55 (t, *J* = 7.9 Hz, 1H), 3.41 (s, 3H).

**<sup>19</sup>F NMR (377 MHz, CDCl<sub>3</sub>):** δ -57.31 (s, 3F).

**<sup>13</sup>C {<sup>1</sup>H} NMR (101 MHz, CDCl<sub>3</sub>):** δ 180.9, 180.4, 149.9, 143.2, 136.1, 135.4, 133.6, 133.2, 132.7, 131.2, 129.6, 127.1, 126.8, 126.6, 124.5, 123.32 (q, *J* = 276.4 Hz), 117.4 (q, *J* = 26.4 Hz), 49.51 (s).

**HRMS (ESI) m/z:** [M+H]<sup>+</sup> Calcd. For C<sub>18</sub>H<sub>12</sub>NO<sub>3</sub>F<sub>3</sub>SCl: 414.0179; found: 414.0176.

**2-((dimethyl(oxo)-λ<sup>6</sup>-sulfaneylidene)amino)-3-(trifluoromethyl)naphthalene-1,4-dione (4e)**

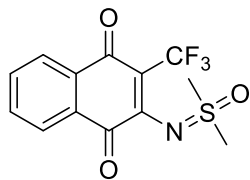

The compound **4e** was purified by column chromatography on silica gel (Eluent: EtOAc/Hexane = 3/7), 118.95 mg, 77% yield; yellow solid.

**<sup>1</sup>H NMR (400 MHz, CDCl<sub>3</sub>):** δ 8.12 (dd, *J* = 7.7, 0.9 Hz, 1H), 8.07 (dd, *J* = 7.7, 0.9 Hz, 1H), 7.78 (td, *J* = 7.6, 1.4 Hz, 1H), 7.69 (td, *J* = 7.6, 1.3 Hz, 1H), 3.46 (s, 6H).

**<sup>19</sup>F NMR (377 MHz, CDCl<sub>3</sub>):** δ -57.15 (s, 3F).

**<sup>13</sup>C {<sup>1</sup>H} NMR (101 MHz, CDCl<sub>3</sub>):** δ 182.1, 180.5, 150.3, 135.4, 133.1, 132.8, 130.0, 127.0, 126.8, 123.8 (q, *J* = 272.7 Hz), 116.4 (q, *J* = 25.8 Hz), 46.8.

**HRMS (ESI) m/z:** [M+H]<sup>+</sup> Calcd. For C<sub>13</sub>H<sub>11</sub>NO<sub>3</sub>F<sub>3</sub>S: 318.0142; found: 318.0142.

**2-((diethyl(oxo)-λ<sup>6</sup>-sulfaneylidene)amino)-3-(trifluoromethyl)naphthalene-1,4-dione (4f)**

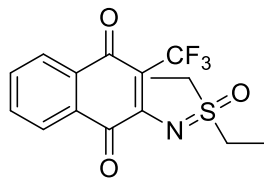

The compound **4f** was purified by column chromatography on silica gel (Eluent: EtOAc/Hexane = 3/7), 81.88 mg, 75% yield; yellow solid.

**<sup>1</sup>H NMR (400 MHz, CDCl<sub>3</sub>):** δ 8.14 – 8.10 (m, 1H), 8.05 (dd, *J* = 7.7, 0.8 Hz, 1H), 7.76 (td, *J* = 7.6, 1.2 Hz, 1H), 7.67 (td, *J* = 7.6, 1.2 Hz, 1H), 3.51 (q, *J* = 7.4 Hz, 4H), 1.48 (t, *J* = 7.4 Hz, 6H).

**<sup>19</sup>F NMR (377 MHz, CDCl<sub>3</sub>):** δ -57.13 (s, 3F).

**<sup>13</sup>C {<sup>1</sup>H} NMR (101 MHz, CDCl<sub>3</sub>):** δ 182.1, 180.4, 151.7, 135.3, 133.0, 132.9, 130.1, 126.9, 126.7, 122.3 (q, *J* = 277.7 Hz), 116.1 (q, *J* = 26.0 Hz), 50.2, 7.6.

**HRMS (ESI) m/z:** [M+H]<sup>+</sup> Calcd. For C<sub>15</sub>H<sub>15</sub>F<sub>3</sub>NO<sub>3</sub>S: 346.0725; found: 346.0723.

**2-((methyl(oxo)(p-tolyl)-λ<sup>6</sup>-sulfaneylidene)amino)-3-(trifluoromethyl)naphthalene-1,4-dione (4g)**

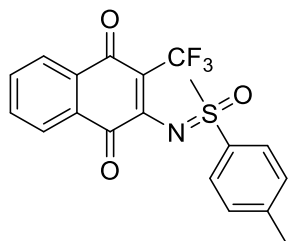

The compound **4g** was purified by column chromatography on silica gel (Eluent: EtOAc/Hexane = 2/8), 84.56 mg, 68% yield; yellow solid.

**<sup>1</sup>H NMR (400 MHz, CDCl<sub>3</sub>):** δ 8.11 (d, *J* = 7.7 Hz, 1H), 7.94 (d, *J* = 7.7 Hz, 1H), 7.87 (d, *J* = 8.2 Hz, 2H), 7.74 (t, *J* = 7.4 Hz, 1H), 7.61 (t, *J* = 7.5 Hz, 1H), 7.39 (d, *J* = 8.1 Hz, 2H), 3.39 (s, 3H), 2.45 (s, 3H).

**<sup>19</sup>F NMR (377 MHz, CDCl<sub>3</sub>):** δ -57.30 (s, 3F).

**<sup>13</sup>C {<sup>1</sup>H} NMR (101 MHz, CDCl<sub>3</sub>):** δ 180.9, 180.5, 150.6, 144.5, 138.2, 135.2, 133.0, 132.8, 130.5, 129.8, 127.1, 126.7, 126.5, 122.8 (q, *J* = 141.4 Hz) 109.5 (q, *J* = 121.2 Hz), 49.7, 21.7.

**HRMS (ESI) m/z:** [M+H]<sup>+</sup> Calcd. For C<sub>19</sub>H<sub>15</sub>F<sub>3</sub>NO<sub>3</sub>S: 394.0725; found: 394.0722.

**2-((ethyl(oxo)(phenyl)-λ<sup>6</sup>-sulfaneylidene)amino)-3-(trifluoromethyl)naphthalene-1,4-dione (4h)**

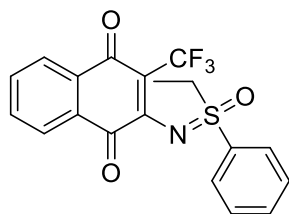

The compound **4h** was purified by column chromatography on silica gel (Eluent: EtOAc/Hexane = 2/8), 89.50 mg, 72% yield; yellow solid.



**<sup>1</sup>H NMR (400 MHz, CDCl<sub>3</sub>):** δ 8.10 (d, *J* = 7.8 Hz, 1H), 7.96 – 7.85 (m, 3H), 7.75 – 7.69 (m, 1H), 7.68 – 7.53 (m, 4H), 3.43 (dd, *J* = 7.3, 3.7 Hz, 2H), 1.36 (dd, *J* = 7.7, 7.0 Hz, 3H).

**<sup>19</sup>F NMR (377 MHz, CDCl<sub>3</sub>):** δ -57.21 (s, 3F).

**<sup>13</sup>C {<sup>1</sup>H} NMR (101 MHz, CDCl<sub>3</sub>):** 180.7, 180.4, 151.0, 140.6, 139.2, 135.2, 133.4, 133.0, 132.8, 129.8, 127.0 (2C), 126.6, 123.8 (q, *J* = 277.8 Hz), 117.8 (q, *J* = 9.1 Hz), 55.8, 7.3.

**HRMS (ESI) m/z:** [M+H]<sup>+</sup> Calcd. For C<sub>19</sub>H<sub>15</sub>F<sub>3</sub>NO<sub>3</sub>S: 394.0725; found: 394.0728.

### 2-morpholino-3-(trifluoromethyl)naphthalene-1,4-dione (4i)

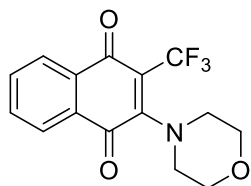

The compound **4i** was purified by column chromatography on basic alumina (Eluent: EtOAc/Hexane = 1/9), 66.92 mg, 68% yield; orange coloured solid; m.p. = 175 - 177 °C.

**<sup>1</sup>H NMR (400 MHz, CDCl<sub>3</sub>):** δ 8.10 (dd, *J* = 7.5, 0.9 Hz, 1H), 8.02 – 7.99 (m, 1H), 7.75 (dt, *J* = 7.6, 3.8 Hz, 1H), 7.70 (dt, *J* = 7.5, 1.4 Hz, 1H), 3.89 – 3.86 (m, 4H), 3.73 – 3.69 (m, 4H).

**<sup>19</sup>F NMR (377 MHz, CDCl<sub>3</sub>):** δ -56.77 (s, 3F).

**<sup>13</sup>C {<sup>1</sup>H} NMR (101 MHz, CDCl<sub>3</sub>):** δ 183.4, 181.0, 151.9, 134.9, 133.4, 132.2, 131.7, 126.9, 126.3, 123.4 (q, *J* = 274.7 Hz), 111.4 (q, *J* = 28.5 Hz), 67.5, 54.2 (d, *J* = 2.3 Hz).

**HRMS (ESI) m/z:** [M+H]<sup>+</sup> Calcd. For C<sub>15</sub>H<sub>13</sub>F<sub>3</sub>NO<sub>3</sub>: 312.8001; found: 311.8005.

### 2-(pyrrolidin-1-yl)-3-(trifluoromethyl)naphthalene-1,4-dione (4j)

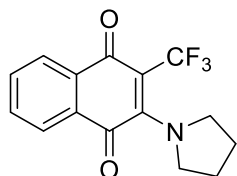

The compound **4j** was purified by column chromatography on basic alumina (Eluent: EtOAc/Hexane = 1/9), 59.74 mg, 64% yield; orange coloured solid.

**<sup>1</sup>H NMR (400 MHz, CDCl<sub>3</sub>):** δ 8.10 (d, *J* = 7.7 Hz, 1H), 7.88 (dd, *J* = 7.6, 0.6 Hz, 1H), 7.72 (td, *J* = 7.6, 1.2 Hz, 1H), 7.61 (td, *J* = 7.6, 1.2 Hz, 1H), 3.82 (d, *J* = 0.9 Hz, 4H), 1.98 – 1.94 (m, 4H).

**<sup>19</sup>F NMR (377 MHz, CDCl<sub>3</sub>):** δ -52.73 (s, 3F).

**<sup>13</sup>C {<sup>1</sup>H} NMR (101 MHz, CDCl<sub>3</sub>):** δ 184.4, 178.8, 155.2, 134.9, 133.0, 132.4, 131.2, 126.4, 125.7, 124.4 (q, *J* = 272.7 Hz), 102.6 (q, *J* = 18.5 Hz), 54.6, 25.3.

**HRMS (ESI) m/z:** [M+H]<sup>+</sup> Calcd. For C<sub>15</sub>H<sub>13</sub>NO<sub>2</sub>F<sub>3</sub>: 296.0898; found: 296.0899.

#### 2-amino-3-(trifluoromethyl)naphthalene-1,4-dione (**4k**)

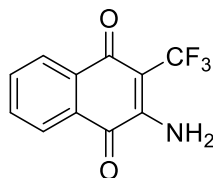

The compound **4k** was purified by column chromatography on silica gel (Eluent: EtOAc/Hexane = 1/9), 59.54 mg, 78% yield; yellow solid.

**<sup>1</sup>H NMR (400 MHz, CDCl<sub>3</sub>):** δ 8.17 (d, *J* = 7.8 Hz, 1H), 8.09 (d, *J* = 7.7 Hz, 1H), 7.83 – 7.78 (m, 1H), 7.72 – 7.66 (m, 1H), 6.52 (s, 1H), 6.07 (s, 1H).

**<sup>19</sup>F NMR (377 MHz, CDCl<sub>3</sub>):** δ -55.97 (s, 3F).

**<sup>13</sup>C {<sup>1</sup>H} NMR (101 MHz, CDCl<sub>3</sub>):** δ 180.3, 179.0, 146.0, 136.0, 133.0 (d, *J* = 13.7 Hz), 129.5, 127.0, 126.8, 125.0 (q, *J* = 275.7 Hz), 102.6 (q, *J* = 27.5 Hz).

**HRMS (ESI) m/z:** [M+H]<sup>+</sup> Calcd. For C<sub>11</sub>H<sub>7</sub>F<sub>3</sub>NO<sub>2</sub>: 242.0429; found: 242.0424.

#### 6,7-dimethyl-2-(piperidin-1-yl)-3-(trifluoromethyl)naphthalene-1,4-dione (**4l**)

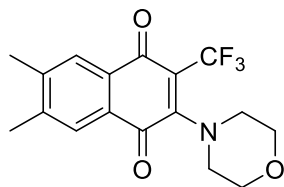

The compound **4l** was purified by column chromatography on basic alumina (Eluent: EtOAc/Hexane = 1/9), 58.32 mg, 64% yield; yellow solid.

**<sup>1</sup>H NMR (400 MHz, CDCl<sub>3</sub>):** δ 7.84 (s, 1H), 7.74 (s, 1H), 3.89 – 3.86 (m, 4H), 3.71 – 3.67 (m, 4H), 2.39 (d, *J* = 4.6 Hz, 6H).

**<sup>19</sup>F NMR (377 MHz, CDCl<sub>3</sub>):** δ -56.69 (s, 3F).

**<sup>13</sup>C {<sup>1</sup>H} NMR (101 MHz, CDCl<sub>3</sub>):** δ 183.4, 181.5, 151.9, 145.1, 143.1, 130.2, 129.6, 127.9, 127.2, 123.5 (q, *J* = 275.7 Hz), 111.3 (q, *J* = 28.5 Hz), 67.5, 54.2, 20.5, 20.2.

**HRMS (ESI) m/z:** [M+H]<sup>+</sup> Calcd. For C<sub>17</sub>H<sub>17</sub>F<sub>3</sub>NO<sub>3</sub>: 340.1161; found: 340.1163.

**6,7-dimethyl-2-morpholino-3-(trifluoromethyl)naphthalene-1,4-dione (4m)**

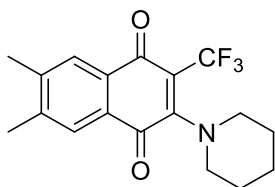

The compound **4m** was purified by column chromatography on basic alumina (Eluent: EtOAc/Hexane = 1/19), 56.16 mg, 62% yield; yellow solid.

**<sup>1</sup>H NMR (400 MHz, CDCl<sub>3</sub>):** δ 7.84 (s, 2H), 7.74 (s, 2H), 3.61 (s, 8H), 2.38 (d, *J* = 4.6 Hz, 15H), 1.77 (d, *J* = 9.5 Hz, 8H), 1.59 (s, 4H).

**<sup>19</sup>F NMR (377 MHz, CDCl<sub>3</sub>):** δ -56.61 (s, 3F).

**<sup>13</sup>C {<sup>1</sup>H} NMR (101 MHz, CDCl<sub>3</sub>):** δ 183.6, 181.5, 152.8, 144.7, 142.7, 130.4, 129.7, 127.8, 127.1, 123.9 (q, *J* = 275.7 Hz), 113.6 (q, *J* = 30.3 Hz), 55.2, 27.1, 24.1, 20.4, 20.2.

**HRMS (ESI) m/z:** [M+H]<sup>+</sup> Calcd. For C<sub>18</sub>H<sub>19</sub>NO<sub>2</sub>F<sub>3</sub>: 338.1368 found: 338.1370.

**6,7-dimethyl-2-(pyrrolidin-1-yl)-3-(trifluoromethyl)naphthalene-1,4-dione (4n)**

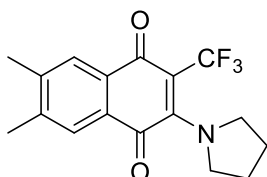

The compound **4n** was purified by column chromatography on basic alumina (Eluent: EtOAc/Hexane = 1/19), 52.09 mg, 60% yield; yellow solid.

**<sup>1</sup>H NMR (400 MHz, CDCl<sub>3</sub>):** <sup>1</sup>H NMR (400 MHz, CDCl<sub>3</sub>) δ 7.84 (s, 1H), 7.64 (s, 1H), 3.82 (s, 4H), 2.37 (d, *J* = 9.0 Hz, 6H), 1.96 (t, *J* = 6.5 Hz, 4H).

**<sup>19</sup>F NMR (377 MHz, CDCl<sub>3</sub>):** δ -52.60 (s, 3F).

**<sup>13</sup>C {<sup>1</sup>H} NMR (101 MHz, CDCl<sub>3</sub>):** δ 183.2, 178.1, 154.2, 143.8, 140.8, 129.8 (d, *J* = 1.2 Hz), 127.8, 126.7 (d, *J* = 3.1 Hz), 126.2, 125.7, 100.8 (q, *J* = 29.7 Hz), 53.4, 24.1, 19.3, 18.9.

**HRMS (ESI) m/z:** [M+H]<sup>+</sup> Calcd. For C<sub>17</sub>H<sub>17</sub>F<sub>3</sub>NO<sub>2</sub>: 324.1211 found: 324.1207.

**2-((methyl(oxo)(phenyl)-λ<sup>6</sup>-sulfaneylidene)amino)-3-(trifluoromethyl)cyclohexa-2,5-diene-1,4-dione (5a)**

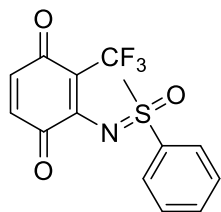

The compound **5a** was purified by column chromatography on silica gel (Eluent: EtOAc/Hexane = 3/17), 118.80 mg, 78% yield; yellow solid.

**<sup>1</sup>H NMR (400 MHz, CDCl<sub>3</sub>):** δ 7.98-7.95 (m, 2H), 7.69 – 7.59 (m, 3H), 6.66 (q, *J* = 10.1 Hz, 2H), 3.38 (s, 3H).

**<sup>19</sup>F NMR (377 MHz, CDCl<sub>3</sub>):** δ -51.67 (s, 3F).

**<sup>13</sup>C {<sup>1</sup>H} NMR (101 MHz, CDCl<sub>3</sub>):** δ 182.6, 182.2, 148.8, 140.9, 139.3, 133.6, 132.6, 129.9, 126.4, 123.1 (q, *J* = 277.7 Hz), 115.0 (q, *J* = 27.1 Hz), 49.4.

**HRMS (ESI) m/z:** [M+H]<sup>+</sup> Calcd. For C<sub>14</sub>H<sub>11</sub>F<sub>3</sub>NO<sub>3</sub>S: 330.0412; found: 330.0410.

**2-(((3-chlorophenyl)(methyl)(oxo)-λ<sup>6</sup>-sulfaneylidene)amino)-3-(trifluoromethyl)cyclohexa-2,5-diene-1,4-dione (5b)**

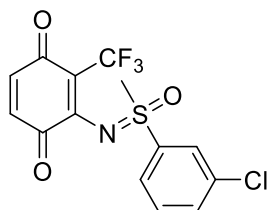

The compound **5b** was purified by column chromatography on silica gel (Eluent: EtOAc/Hexane = 1/9), 126.04 mg, 75% yield; yellow solid.

**<sup>1</sup>H NMR (400 MHz, CDCl<sub>3</sub>):** δ 7.95 (t, *J* = 1.8 Hz, 1H), 7.82 (d, *J* = 7.9 Hz, 1H), 7.63 (d, *J* = 8.7 Hz, 1H), 7.55 (t, *J* = 7.9 Hz, 1H), 6.71 – 6.64 (m, 2H), 3.38 (s, 3H).

**<sup>19</sup>F NMR (377 MHz, CDCl<sub>3</sub>):** δ -57.63 (s, 3F).

**<sup>13</sup>C {<sup>1</sup>H} NMR (101 MHz, CDCl<sub>3</sub>):** δ 182.5, 182.3, 148.2, 142.9, 139.3, 136.2, 133.8, 132.7, 131.2, 126.6, 126.0 (q, *J* = 275.9 Hz), 124.5, 115.5 (q, *J* = 30.3 Hz), 49.4.

**HRMS (ESI) m/z:** [M+H]<sup>+</sup> Calcd. For C<sub>14</sub>H<sub>10</sub>NO<sub>3</sub>F<sub>3</sub>ClS: 364.0022; found: 364.0017.

**2-(((4-fluorophenyl)(methyl)(oxo)-λ<sup>6</sup>-sulfaneylidene)amino)-3-(trifluoromethyl)cyclohexa-2,5-diene-1,4-dione (5c)**

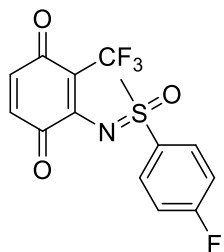

The compound **5c** was purified by column chromatography on silica gel (Eluent: EtOAc/Hexane = 3/7), 101.20 mg, 63% yield; yellow solid.

**<sup>1</sup>H NMR (400 MHz, CDCl<sub>3</sub>):** δ 8.01 – 7.96 (m, 2H), 7.31 – 7.27 (m, 2H), 6.68 (q, *J* = 10.1 Hz, 2H), 3.39 (s, 3H).

**<sup>19</sup>F NMR (377 MHz, CDCl<sub>3</sub>):** δ -57.62 (s, 3F), -103.58 (m, 1F).

**<sup>13</sup>C {<sup>1</sup>H} NMR (101 MHz, CDCl<sub>3</sub>):** δ 182.5, 182.3, 165.7 (d, *J* = 256.5 Hz), 148.5, 139.3 (d, *J* = 1.1 Hz), 137.0 (d, *J* = 3.5 Hz), 132.7, 129.4 (d, *J* = 9.6 Hz), 123.0 (q, *J* = 275.7 Hz), 117.3, 117.1, 115.6 (q, *J* = 27.1 Hz), 49.52.

**HRMS (ESI) m/z:** [M+H]<sup>+</sup> Calcd. For C<sub>14</sub>H<sub>10</sub>F<sub>4</sub>NO<sub>3</sub>S: 348.0318; found: 348.0315.

**2-(((2-chlorophenyl)(methyl)(oxo)-λ<sup>6</sup>-sulfaneylidene)amino)-3-(trifluoromethyl)cyclohexa-2,5-diene-1,4-dione (**5d**)**

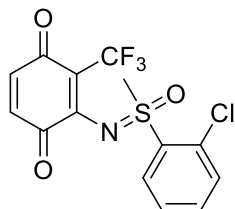

The compound **5d** was purified by column chromatography on silica gel (Eluent: EtOAc/Hexane = 2/8), 100.83 mg, 60% yield; yellow solid.

**<sup>1</sup>H NMR (400 MHz, CDCl<sub>3</sub>):** δ 8.39 – 8.35 (m, 1H), 7.60 – 7.56 (m, 2H), 7.53 – 7.50 (m, 1H), 6.67 (d, *J* = 10.0 Hz, 1H), 6.59 (d, *J* = 10.0 Hz, 1H), 3.48 (s, 3H).

**<sup>19</sup>F NMR (377 MHz, CDCl<sub>3</sub>):** δ -57.28 (s, 3F).

**<sup>13</sup>C {<sup>1</sup>H} NMR (101 MHz, CDCl<sub>3</sub>):** δ 182.7, 182.0, 147.7, 139.4, 138.4, 134.4, 132.6, 132.3, 131.3, 130.8, 128.0, 122.8 (q, *J* = 277.7 Hz), 116.4 (q, *J* = 38.4 Hz), 47.2.

**HRMS (ESI) m/z:** [M+H]<sup>+</sup> Calcd. For C<sub>14</sub>H<sub>10</sub>NO<sub>3</sub>F<sub>3</sub>SCl: 364.0022; found: 364.0020.

**2-(((3-methoxyphenyl)(methyl)(oxo)-λ<sup>6</sup>-sulfaneylidene)amino)-3-(trifluoromethyl)cyclohexa-2,5-diene-1,4-dione (**5e**)**

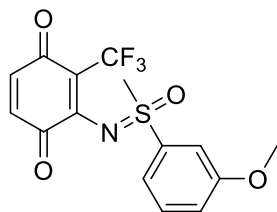

The compound **5e** was purified by column chromatography on silica gel (Eluent: EtOAc/Hexane = 2/8), 108.03 mg, 65% yield; yellow solid.

**<sup>1</sup>H NMR (400 MHz, CDCl<sub>3</sub>):** δ 7.91 – 7.85 (m, 2H), 7.07 – 7.03 (m, 2H), 6.64 (d, *J* = 6.2 Hz, 2H), 3.88 (s, 3H), 3.37 (s, 3H).

**<sup>19</sup>F NMR (377 MHz, CDCl<sub>3</sub>):** δ -57.58 (s, 3F).

**<sup>13</sup>C {<sup>1</sup>H} NMR (101 MHz, CDCl<sub>3</sub>):** δ 182.6, 182.3, 163.6, 149.1, 139.2, 132.7, 132.0, 130.4, 128.7, 121.5 (q, *J* = 39.3 Hz), 114.9 (d, *J* = 12.6 Hz), 55.9, 46.7.

**HRMS (ESI) m/z:** [M+H]<sup>+</sup> Calcd. For C<sub>15</sub>H<sub>13</sub>F<sub>3</sub>NO<sub>4</sub>S: 360.0517; found: 360.0515.

**2-(((4-bromophenyl)(methyl)(oxo)-λ<sup>6</sup>-sulfaneylidene)amino)-3-(trifluoromethyl)cyclohexa-2,5-diene-1,4-dione (5f)**

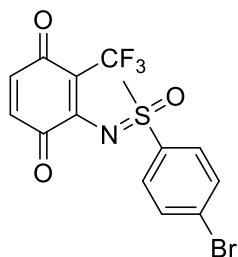

The compound **5f** was purified by column chromatography on silica gel (Eluent: EtOAc/Hexane = 1/9), 135.67 mg, 72% yield; yellow solid.

**<sup>1</sup>H NMR (400 MHz, CDCl<sub>3</sub>):** δ 7.95 (t, *J* = 1.8 Hz, 1H), 7.83 (dd, *J* = 7.8, 1.0 Hz, 1H), 7.65 – 7.61 (m, 1H), 7.55 (t, *J* = 7.9 Hz, 1H), 6.68 (q, *J* = 10.1 Hz, 2H), 3.38 (s, 3H).

**<sup>19</sup>F NMR (377 MHz, CDCl<sub>3</sub>):** δ -57.63 (s, 3F).

**<sup>13</sup>C {<sup>1</sup>H} NMR (101 MHz, CDCl<sub>3</sub>):** δ 182.5, 182.3, 148.2, 142.9, 139.4, 136.2, 133.8, 132.7, 131.2, 126.6, 126.0 (q, *J* = 224.2 Hz), 124.5, 115.5 (q, *J* = 27.3 Hz), 105.1, 49.4.

**HRMS (ESI) m/z:** [M+H]<sup>+</sup> Calcd. For C<sub>14</sub>H<sub>10</sub>F<sub>3</sub>NO<sub>3</sub>SBr: 407.9517; found: 407.9519.

**2-(((methyl(oxo)(p-tolyl)-λ<sup>6</sup>-sulfaneylidene)amino)-3-(trifluoromethyl)cyclohexa-2,5-diene-1,4-dione (5g)**

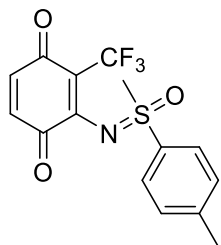

The compound **5g** was purified by column chromatography on silica gel (Eluent: EtOAc/Hexane = 1/9), 114.33 mg, 69% yield; yellow solid.

**<sup>1</sup>H NMR (400 MHz, CDCl<sub>3</sub>):** δ 7.82 (d, *J* = 8.4 Hz, 2H), 7.39 (d, *J* = 8.0 Hz, 2H), 6.63 (q, *J* = 10.1 Hz, 2H), 3.36 (s, 3H), 2.45 (s, 3H).

**<sup>19</sup>F NMR (377 MHz, CDCl<sub>3</sub>):** δ -57.5 8 (s, 3F).

**<sup>13</sup>C {<sup>1</sup>H} NMR (101 MHz, CDCl<sub>3</sub>):** δ 182.7, 182.2, 149.0, 144.8, 139.2 (d, *J* = 1.1 Hz), 137.8, 132.7, 130.5, 126.4, 121.3 (q, *J* = 161.6 Hz), 114.8 (q, *J* = 27.1 Hz), 49.5, 21.7.

**HRMS (ESI) m/z:** [M+H]<sup>+</sup> Calcd. For C<sub>15</sub>H<sub>13</sub>F<sub>3</sub>NO<sub>3</sub>S: 344.0568; found: 344.0569.

**2-((dimethyl(oxo)-λ<sup>6</sup>-sulfaneylidene)amino)-3-(trifluoromethyl)cyclohexa-2,5-diene-1,4-dione (5h)**

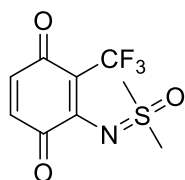

The compound **5h** was purified by column chromatography on silica gel (Eluent: EtOAc/Hexane = 2/8), 82.81 mg, 67% yield; yellow solid.

**<sup>1</sup>H NMR (400 MHz, CDCl<sub>3</sub>):** δ 6.64 (q, *J* = 10.1 Hz, 1H), 3.31 (s, 3H).

**<sup>19</sup>F NMR (377 MHz, CDCl<sub>3</sub>):** δ -57.53 (s, 3F).

**<sup>13</sup>C {<sup>1</sup>H} NMR (101 MHz, CDCl<sub>3</sub>):** δ 183.5, 182.6, 148.7, 139.5, 132.9, 124.3, 121.4 (q, *J* = 37.5 Hz), 46.8.

**HRMS (ESI) m/z:** [M+H]<sup>+</sup> Calcd. For C<sub>9</sub>H<sub>9</sub>F<sub>3</sub>N<sub>2</sub>O<sub>3</sub>S: 268.0255; found: 268.0254.

**2-morpholino-3-(trifluoromethyl)anthracene-1,4-dione (5i)**

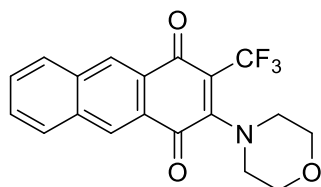

The compound **5i** was purified by column chromatography on basic alumina (Eluent: EtOAc/Hexane = 1/9), 55.53 mg, 64% yield; orange coloured solid.

**<sup>1</sup>H NMR (400 MHz, CDCl<sub>3</sub>):** δ 8.61 (s, 1H), 8.55 (s, 1H), 8.07 – 8.02 (m, 2H), 7.72 – 7.65 (m, 2H), 3.93 – 3.89 (m, 4H), 3.79 – 3.75 (m, 4H).

**<sup>19</sup>F NMR (377 MHz, CDCl<sub>3</sub>):** δ -56.95 (s, 3F).

**<sup>13</sup>C {<sup>1</sup>H} NMR (101 MHz, CDCl<sub>3</sub>):** δ 183.3, 180.9, 153.0, 135.6, 134.7, 130.2, 130.0, 129.7, 129.4, 128.3, 128.1, 123.5 (q, *J* = 274.7 Hz), 113.4 (q, *J* = 17.4 Hz), 67.5, 54.1.

**HRMS (ESI) m/z:** [M+H]<sup>+</sup> Calcd. For C<sub>19</sub>H<sub>15</sub>NO<sub>3</sub>F<sub>3</sub>: 362.1004; found: 362.1006.

**2-((methyl(oxo)(phenyl)-λ<sup>6</sup>-sulfaneylidene)amino)-3-(trifluoromethyl)anthracene-1,4-dione (5j)**

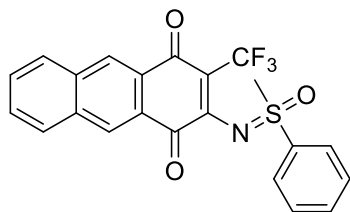

The compound **5j** was purified by column chromatography on silica gel (Eluent: EtOAc/Hexane = 2/8), 59.81 mg, 58% yield; yellow solid.

**<sup>1</sup>H NMR (400 MHz, CDCl<sub>3</sub>):** δ 8.60 (s, 1H), 8.48 (s, 1H), 8.04 – 8.00 (m, 3H), 7.93 (d, *J* = 7.9 Hz, 1H), 7.68-7.60 (m, 5H), 3.43 (s, 3H).

**<sup>19</sup>F NMR (377 MHz, CDCl<sub>3</sub>):** δ -57.35 (s, 3F).

**<sup>13</sup>C {<sup>1</sup>H} NMR (101 MHz, CDCl<sub>3</sub>):** δ 180.6, 180.2, 151.6, 141.6, 135.8, 134.4, 133.4, 130.2 (2C), 130.0 (2C), 129.9, 129.4, 128.8, 128.6, 126.4, 123.6 (q, *J* = 278.7 Hz), 118.4 (q, *J* = 26.0 Hz), 49.7.

**HRMS (ESI) m/z:** [M+H]<sup>+</sup> Calcd. For C<sub>22</sub>H<sub>15</sub>F<sub>3</sub>NO<sub>3</sub>S: 430.0725; found: 430.0727.

**2-(((4-chlorophenyl)(methyl)(oxo)-λ<sup>6</sup>-sulfaneylidene)amino)-3-(trifluoromethyl)anthracene-1,4-dione (5k)**

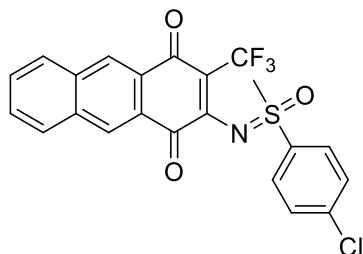



The compound **5k** was purified by column chromatography on silica gel (Eluent: EtOAc/Hexane = 3/17), 58.98 mg, 53% yield; yellow solid.

**<sup>1</sup>H NMR (400 MHz, CDCl<sub>3</sub>):** δ 8.58 (s, 1H), 8.48 (s, 1H), 8.01 (d, *J* = 8.1 Hz, 1H), 8.00 – 7.96 (m, 2H), 7.93 (d, *J* = 8.0 Hz, 1H), 7.68-7.62 (m, 2H), 7.61 – 7.58 (m, 2H), 3.44 (s, 3H).

**<sup>19</sup>F NMR (377 MHz, CDCl<sub>3</sub>):** δ -57.32 (s, 3F).

**<sup>13</sup>C {<sup>1</sup>H} NMR (101 MHz, CDCl<sub>3</sub>):** δ 180.6, 180.1, 151.2, 140.1 (d, *J* = 4.4 Hz), 135.6, 134.4, 130.2 (t, *J* = 6.5 Hz), 129.4, 128.7, 127.9, 126.2, 123.4 (q, *J* = 277.7 Hz), 118.7 (q, *J* = 26.0 Hz), 49.61 (s).

**HRMS (ESI) m/z:** [M+H]<sup>+</sup> Calcd. For C<sub>22</sub>H<sub>14</sub>F<sub>3</sub>NO<sub>3</sub>SCl: 464.0335; found: 464.0341.

**5-methyl-2-((methyl(oxo)(phenyl)-1 $\lambda$ 6-sulfaneylidene)amino)-3-(trifluoromethyl)cyclohexa-2,5-diene-1,4-dione (5l)**

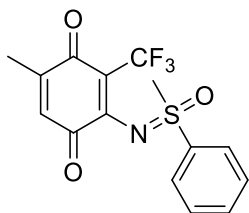

The compound **5l** was purified by column chromatography on silica gel (Eluent: EtOAc/Hexane = 1/9), 97.8 mg, 70% yield; yellow solid.

**<sup>1</sup>H NMR (400 MHz, CDCl<sub>3</sub>)** δ 7.96 – 7.92 (m, 2H), 7.66 – 7.57 (m, 3H), 6.48 (d, *J* = 1.6 Hz, 1H), 3.35 (s, 3H), 2.05 (d, *J* = 1.6 Hz, 3H).

**<sup>19</sup>F NMR (377 MHz, CDCl<sub>3</sub>)** δ -57.50 (s).

**<sup>13</sup>C NMR (101 MHz, CDCl<sub>3</sub>)** δ 182.9, 182.1, 149.1, 148.7, 141.2, 133.5, 129.8 (d, *J* = 15.3 Hz), 126.4, 121.9, 103.3, 49.4, 16.4.

**HRMS (ESI) m/z:** [M+H]<sup>+</sup> Calcd. For C<sub>15</sub>H<sub>13</sub>F<sub>3</sub>NO<sub>3</sub>S: 344.0568; found: 344.0552.

**5-methoxy-2-((methyl(oxo)(phenyl)-1 $\lambda$ 6-sulfaneylidene)amino)-3-(trifluoromethyl)cyclohexa-2,5-diene-1,4-dione (5m)**

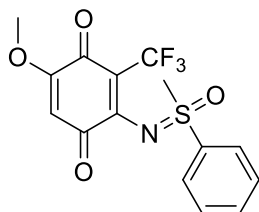

The compound **5m** was purified by column chromatography on silica gel (Eluent: EtOAc/Hexane = 1/9), 94.5 mg, 73% yield; yellow solid.

**<sup>1</sup>H NMR (400 MHz, CDCl<sub>3</sub>)** δ 7.96 – 7.92 (m, 2H), 7.64 – 7.56 (m, 3H), 5.81 (s, 1H), 3.72 (s, 3H), 3.35 (s, 3H).

**<sup>19</sup>F NMR (377 MHz, CDCl<sub>3</sub>)** δ -57.05 (s).

**<sup>13</sup>C NMR (101 MHz, CDCl<sub>3</sub>)** δ 182.9, 178.0, 155.9, 147.1, 141.2, 133.5, 129.8, 126.4, 122.9 (q, *J* = 272.7 Hz), 114.0 (q, *J* = 27.1 Hz), 109.2 (d, *J* = 1.4 Hz), 56.5, 49.4.

**HRMS (ESI) m/z:** [M+H]<sup>+</sup> Calcd. For C<sub>15</sub>H<sub>13</sub>F<sub>3</sub>NO<sub>4</sub>S: 360.0517; found: 360.0361.

**5-(tert-butyl)-2-((methyl(oxo)(phenyl)-16-sulfaneylidene)amino)-3-(trifluoromethyl)cyclohexa-2,5-diene-1,4-dione (5n)**

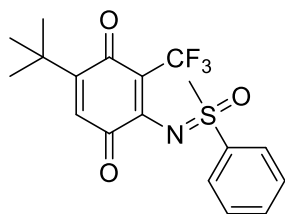

The compound **5n** was purified by column chromatography on silica gel (Eluent: EtOAc/Hexane = 1/9), 86.0 mg, 71% yield; yellow solid.

**<sup>1</sup>H NMR (400 MHz, CDCl<sub>3</sub>)** δ 7.96 – 7.94 (m, 2H), 7.65 – 7.57 (m, 3H), 6.47 (s, 1H), 3.40 (s, 3H), 1.12 (s, 9H).

**<sup>19</sup>F NMR (377 MHz, CDCl<sub>3</sub>)** δ -57.71 (s).

**<sup>13</sup>C NMR (101 MHz, CDCl<sub>3</sub>)** δ 183.2, 182.4, 152.7, 150.5, 141.0, 134.1, 134.5, 129.8, 126.6, 123.0 (q, *J* = 282.8 Hz), 113.4 (q, *J* = 28.3 Hz), 49.3, 35.1, 28.9.

**HRMS (ESI) m/z:** [M+H]<sup>+</sup> Calcd. For C<sub>18</sub>H<sub>19</sub>F<sub>3</sub>NO<sub>3</sub>S: 386.1038; found: 386.1023.

**5-methoxy-3-morpholino-2-(trifluoromethyl)naphthalene-1,4-dione (8a)**

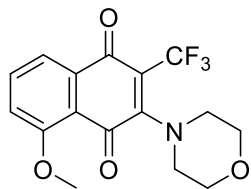

The compound **8a** was purified by column chromatography on silica gel (Eluent: EtOAc/Hexane = 1/9), 39.0 mg, 43% yield; orange coloured solid.

**<sup>1</sup>H NMR (400 MHz, CDCl<sub>3</sub>):** δ 8.15 – 8.09 (m, 3H), 7.92 (d, *J* = 7.6 Hz, 1H), 7.70 – 7.66 (m, 1H), 7.62 – 7.57 (m, 1H), 3.9 (m, 4H), 3.68 (m, 4H).

**<sup>19</sup>F NMR (377 MHz, CDCl<sub>3</sub>):** δ -56.38 (s, 3F).

**<sup>13</sup>C {<sup>1</sup>H} NMR (101 MHz, CDCl<sub>3</sub>):** δ 180.6, 180.2, 151.6, 141.6, 135.8, 134.4, 133.4, 130.2 (2C), 130.0 (2C), 129.9, 129.4, 128.8, 128.6, 126.4, 125.0, 122.2, 118.4 (q, *J* = 26.0 Hz), 49.7.

**HRMS (ESI) m/z:** [M+H]<sup>+</sup> Calcd. For C<sub>16</sub>H<sub>15</sub>F<sub>3</sub>NO<sub>4</sub>: 342.0953; found: 342.0948.

### 3,3-dimethyl-1-(trifluoromethyl)-1,3-dihydro-1λ<sup>3</sup>-benzo[d][1,2]iodaoxole

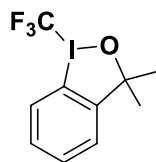

**<sup>19</sup>F NMR (377 MHz, CDCl<sub>3</sub>):** δ 39.90 (s, 3F).

### Togni-1 + Sulfoximine

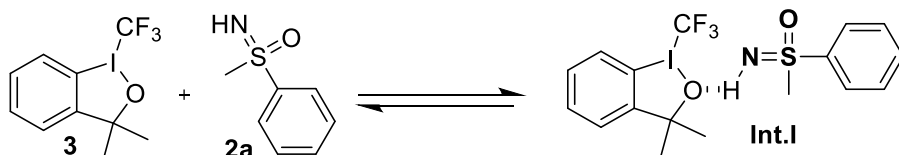

**<sup>19</sup>F NMR (377 MHz, CDCl<sub>3</sub>):** δ 39.54 (s, 3F).

# $^1\text{H}$ and $^{13}\text{C}$ $\{^1\text{H}\}$ NMR and HRMS Spectra

## $^1\text{H}$ NMR (400 MHz) of 4a in $\text{CDCl}_3$

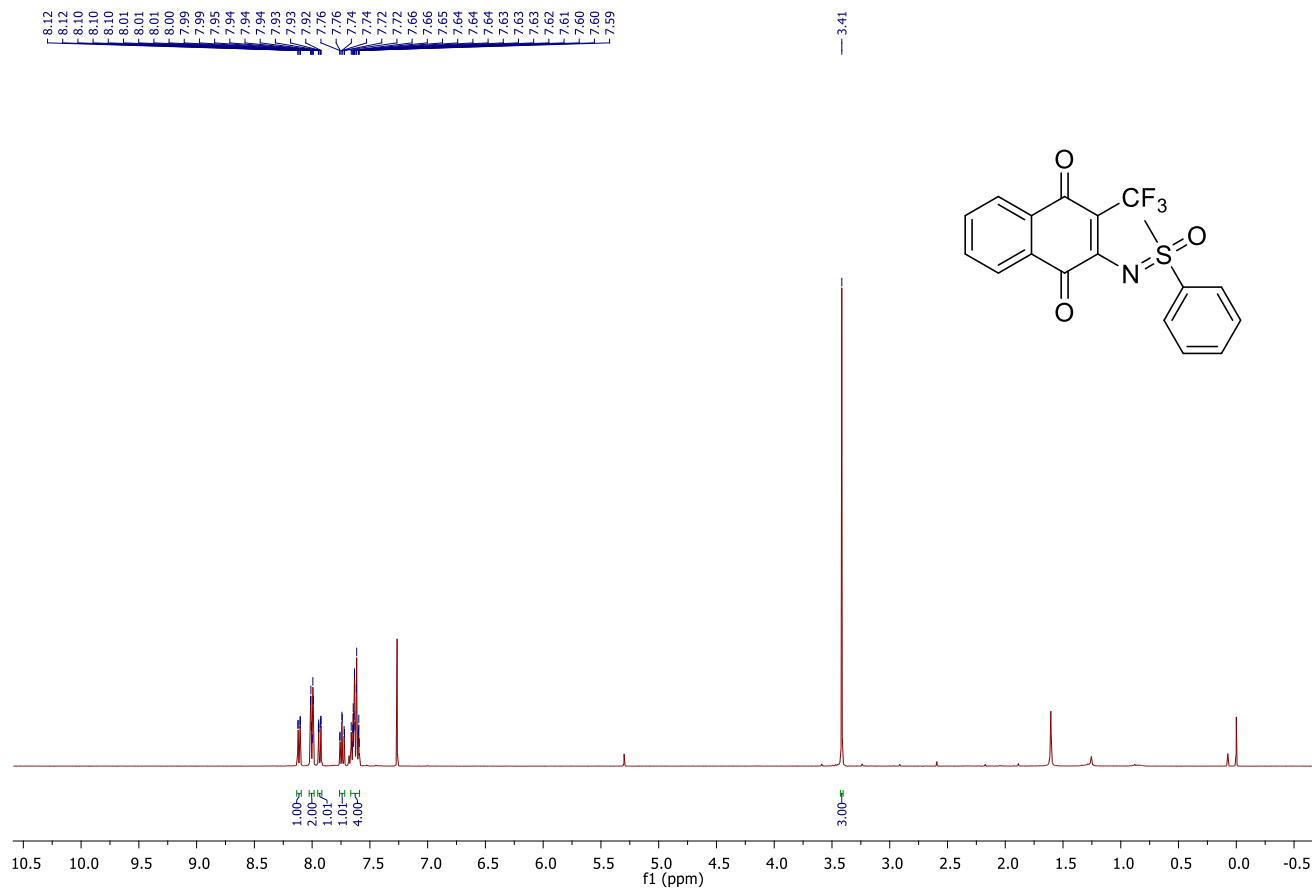

**$^{19}\text{F}$  NMR (377 MHz) of 4a in  $\text{CDCl}_3$**

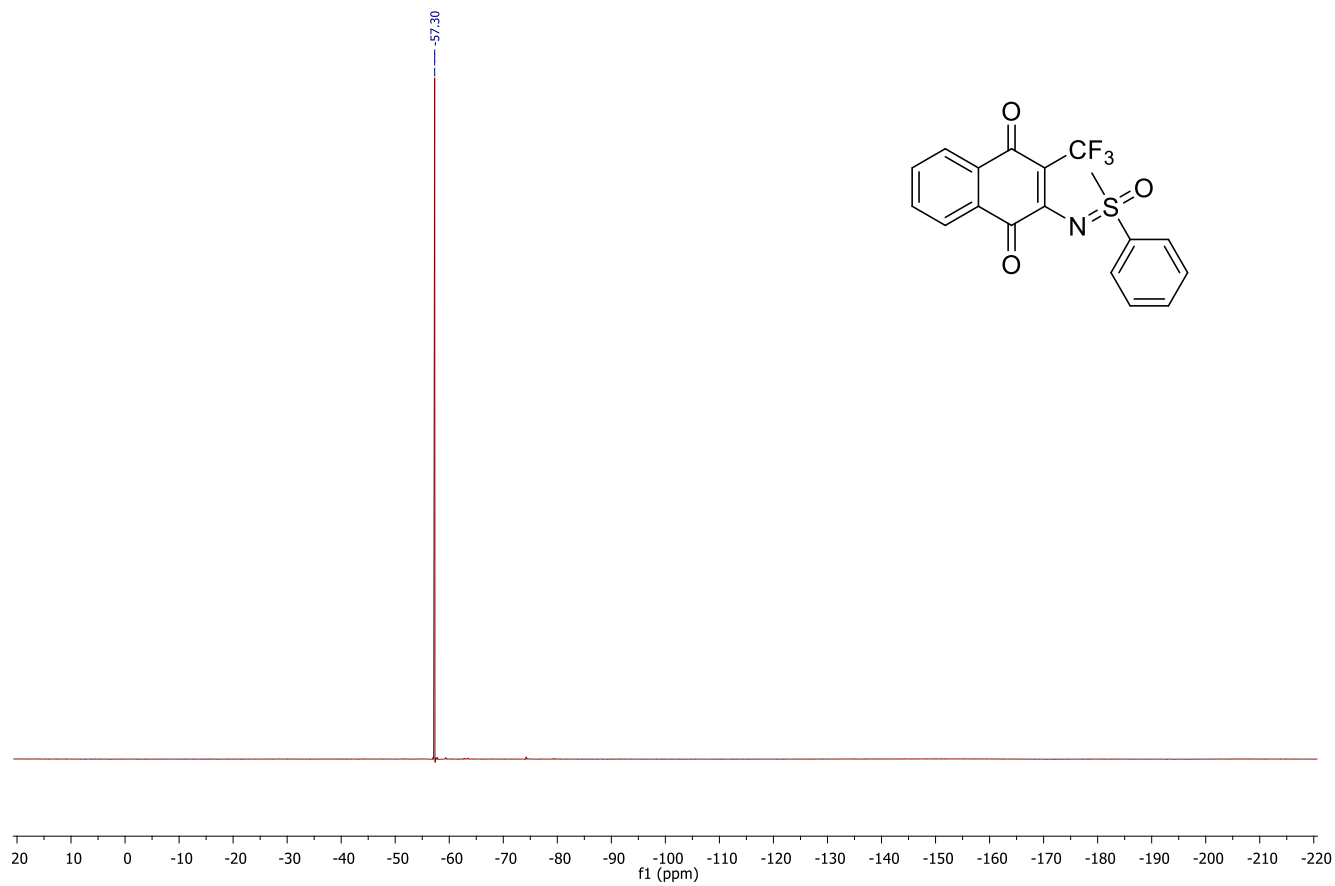

# $^{13}\text{C}$ $\{^1\text{H}\}$ NMR (101 MHz) of 3a in $\text{CDCl}_3$

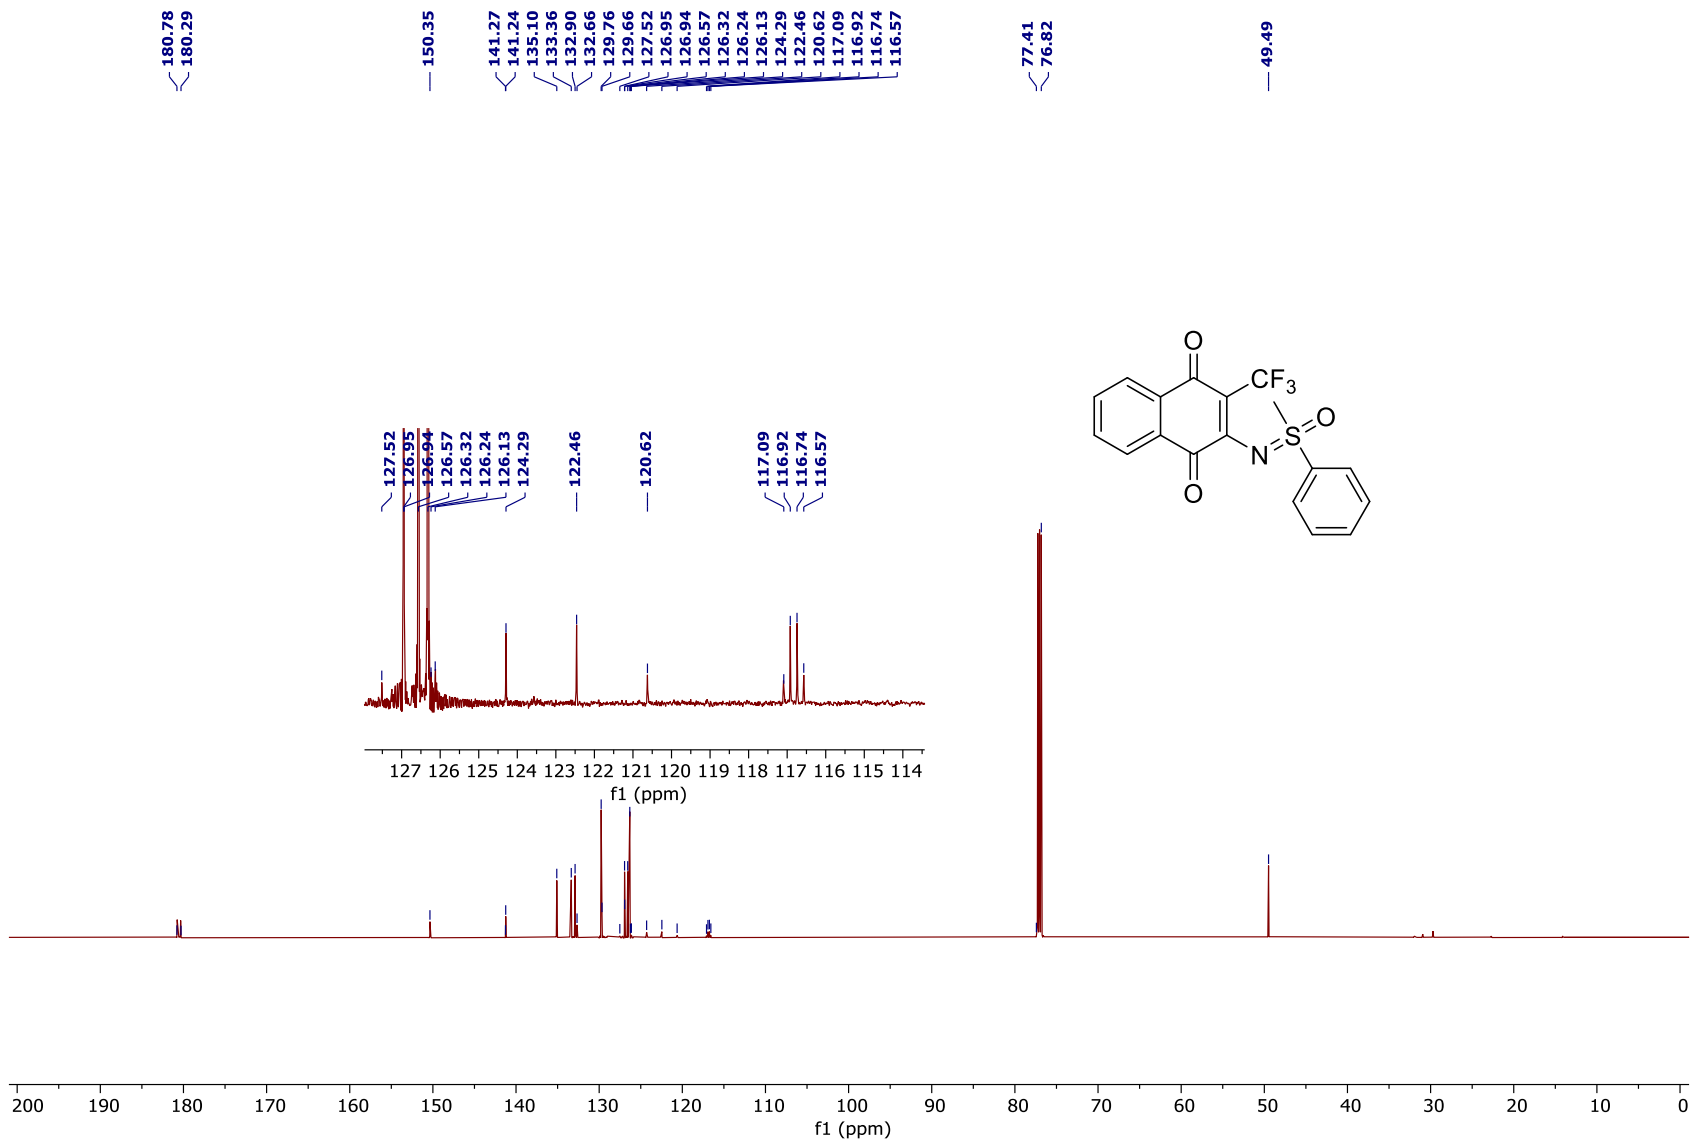

# HRMS of 4a

## Elemental Composition Report

Page 1

### Single Mass Analysis

Tolerance = 50.0 PPM / DBE: min = -1.5, max = 50.0

Element prediction: Off

Number of isotope peaks used for i-FIT = 3

Monoisotopic Mass, Even Electron Ions

69 formula(e) evaluated with 1 results within limits (up to 3 closest results for each mass)

Elements Used:

C: 0-18 H: 0-100 N: 0-1 O: 0-3 F: 0-3 S: 0-1

NQ-1-CF3

QMI DIVISION, CSIR-IIIM JAMMU  
Xevo G2-XS QTOF YFC2015

11-Jul-2023

11:58:59

1: TOF MS ES+

1.28e+007

110723\_02 11 (0.242)

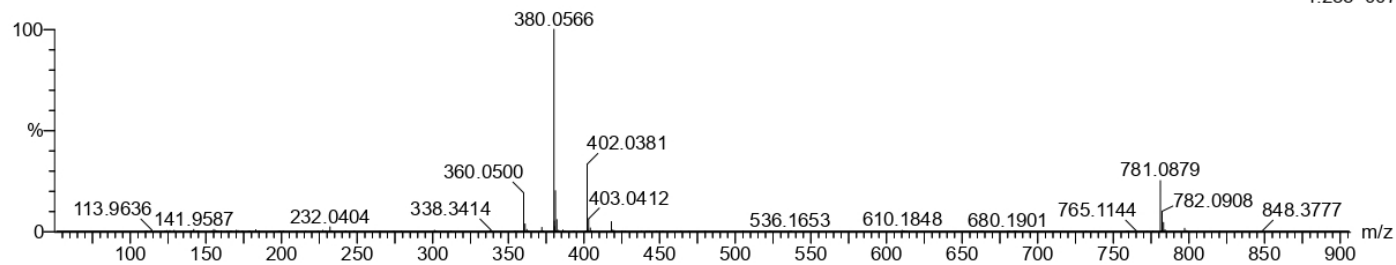

Minimum: -1.5  
Maximum: 2.0 50.0 50.0

| Mass     | Calc. Mass | mDa  | PPM  | DBE  | i-FIT | Norm | Conf(%) | Formula           |
|----------|------------|------|------|------|-------|------|---------|-------------------|
| 380.0566 | 380.0568   | -0.2 | -0.5 | 11.5 | 876.5 | n/a  | n/a     | C18 H13 N O3 F3 S |

# $^1\text{H}$ NMR (400 MHz) of 4b in $\text{CDCl}_3$

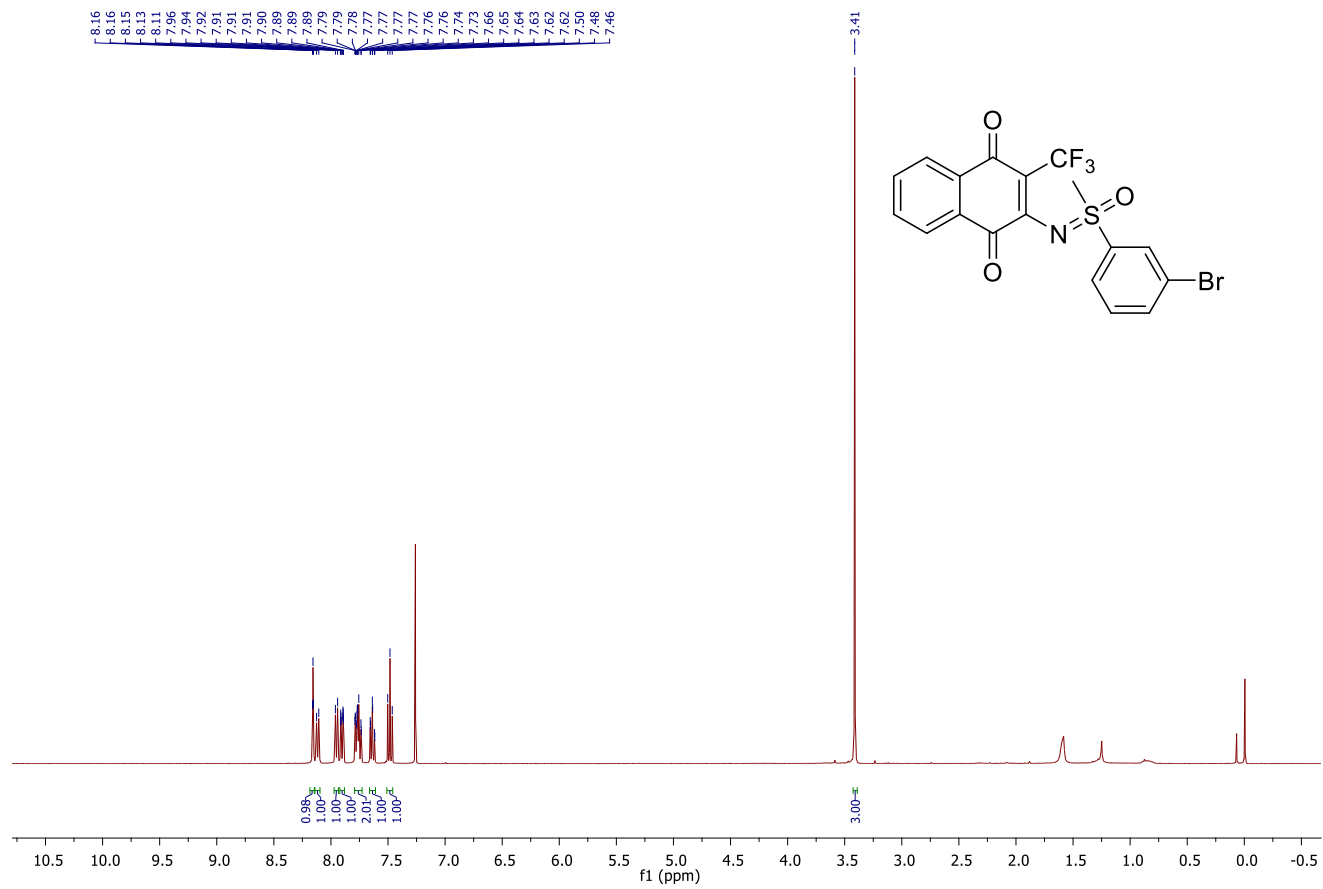



**$^{19}\text{F}$  NMR (377 MHz) of 4b in  $\text{CDCl}_3$**

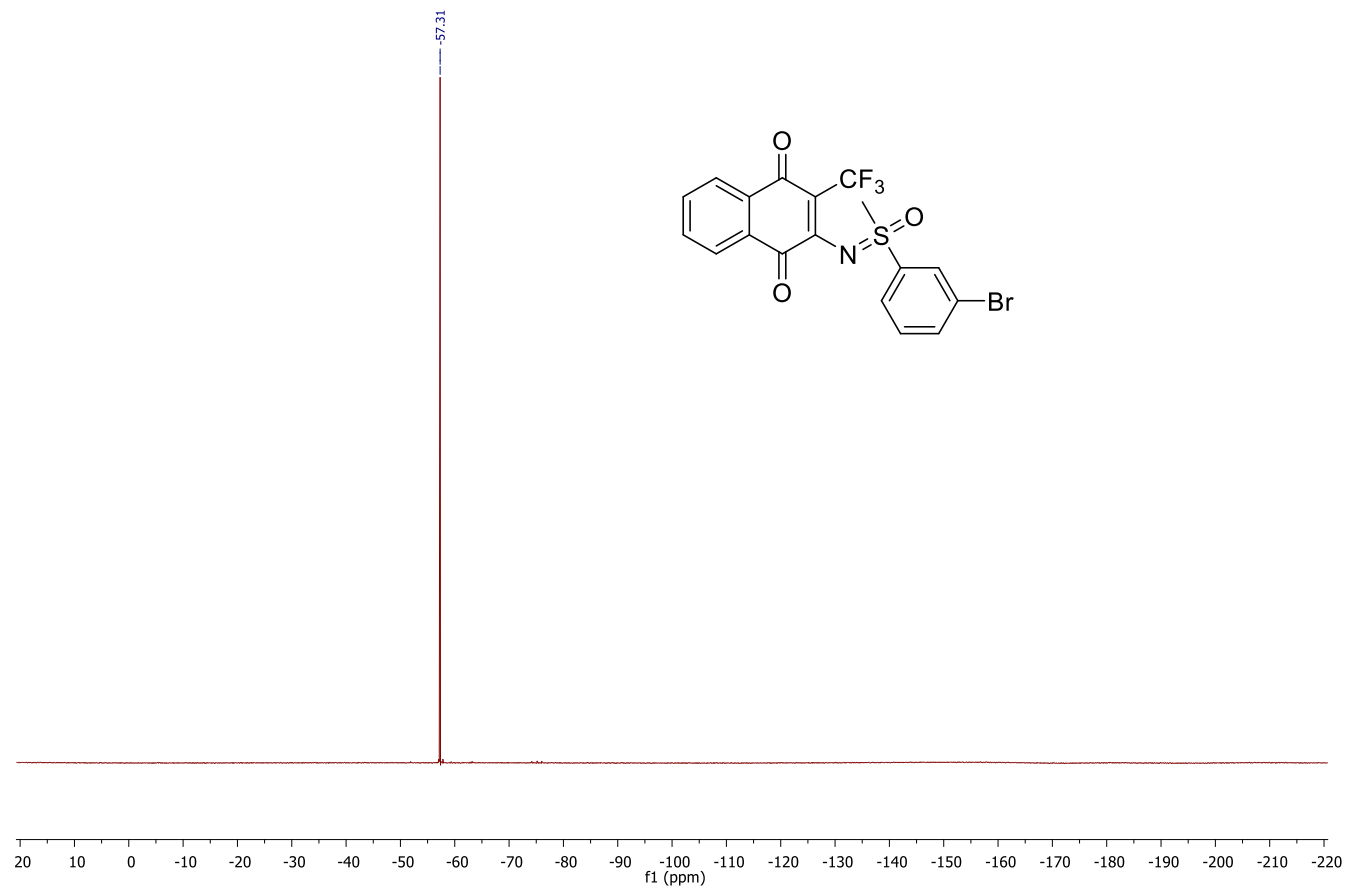

# $^{13}\text{C}$ $\{^1\text{H}\}$ NMR (101 MHz) of 4b in $\text{CDCl}_3$

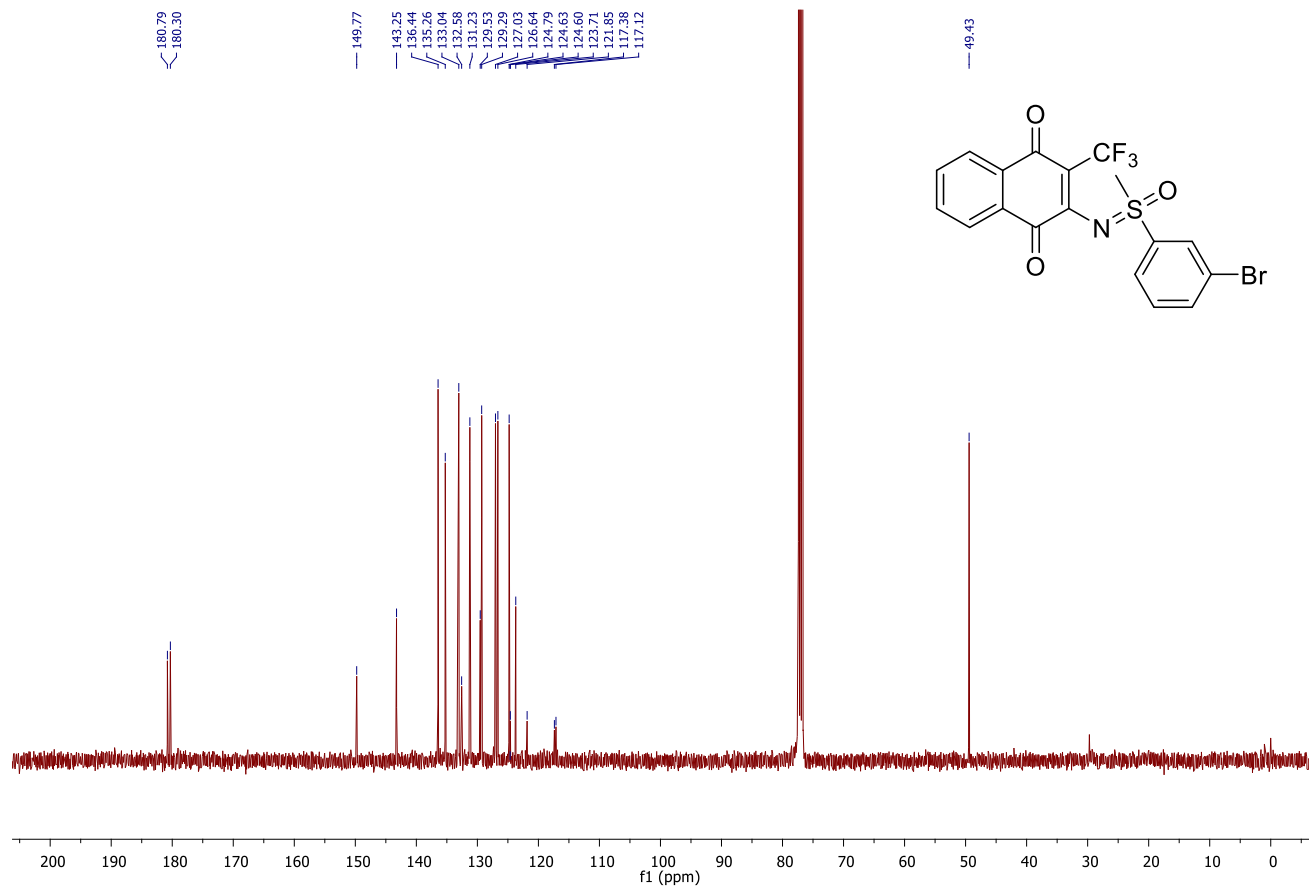

Elemental Composition Report

Single Mass Analysis

Tolerance = 100.0 PPM / DBE: min = -1.5, max = 50.0

Element prediction: Off

Number of isotope peaks used for i-FIT = 3

Monoisotopic Mass, Even Electron Ions

132 formula(e) evaluated with 1 results within limits (up to 3 closest results for each mass)

Elements Used:

C: 0-18 H: 0-100 N: 0-1 O: 0-3 F: 0-3 S: 0-1 Br: 0-1

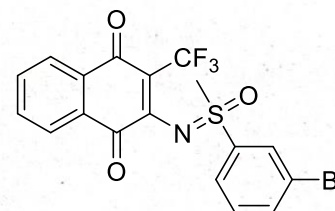

NQS-2-CF3

QMI DIVISION, CSIR-IIIM JAMMU  
Xevo G2-XS QTOF YFC2015.

15-Mar-2023

13:47:35

1: TOF MS ES+

2.91e+007

150323\_34 6 (0.138) Cm (6:8)

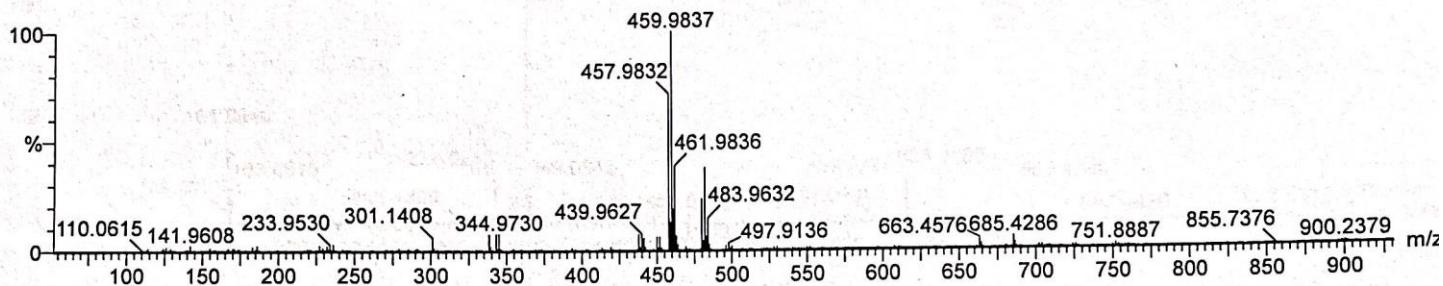

Minimum: -1.5  
Maximum: 2.0 100.0 50.0

| Mass     | Calc. Mass | mDa | PPM | DBE  | i-FIT | Norm | Conf (%) | Formula              |
|----------|------------|-----|-----|------|-------|------|----------|----------------------|
| 459.9837 | 459.9830   | 0.7 | 1.5 | 10.5 | 55.0  | n/a  | n/a      | C18 H14 N O3 F3 S Br |

# $^1\text{H}$ NMR (400 MHz) of 4c in $\text{CDCl}_3$

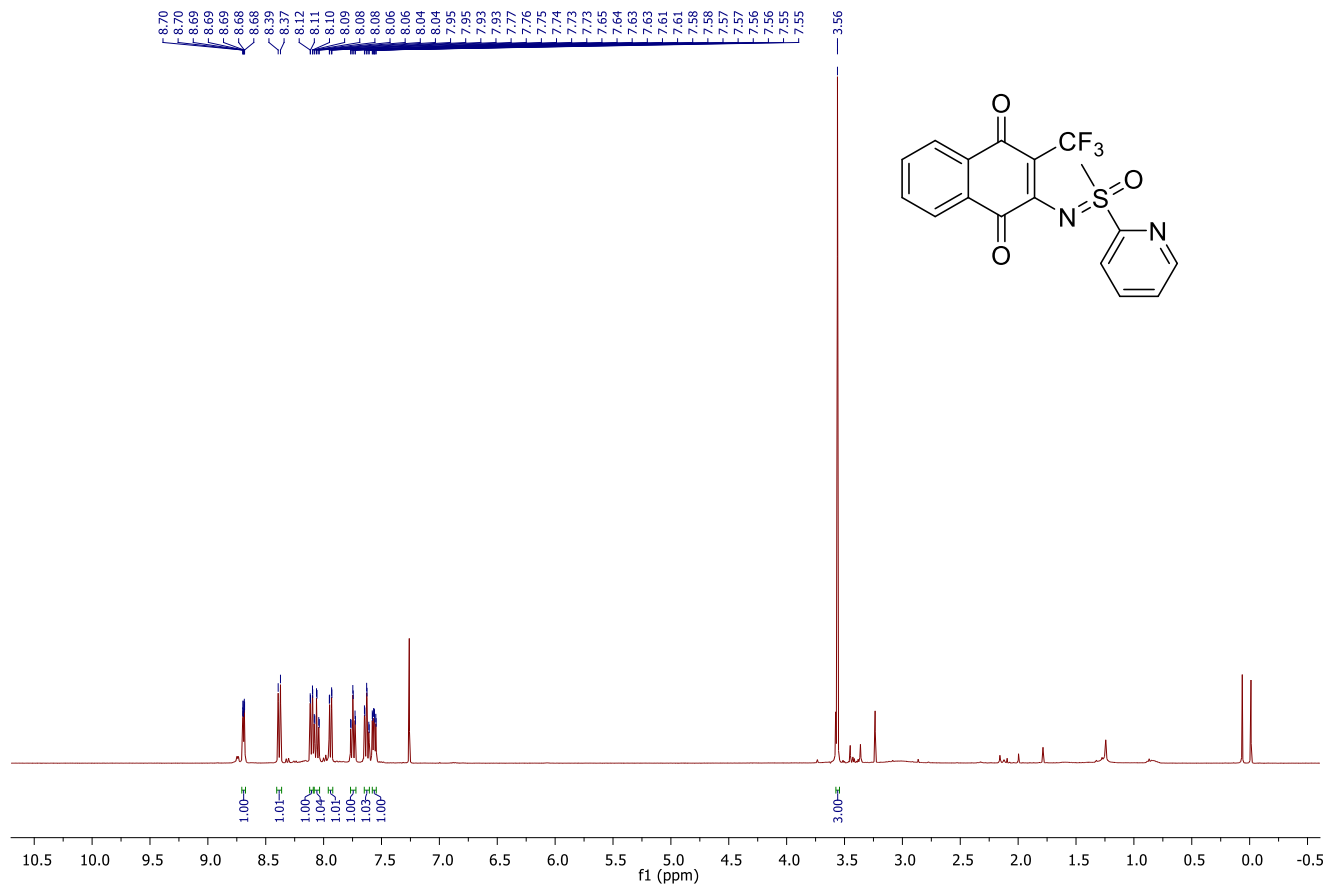

**$^{19}\text{F}$  NMR (377 MHz) of 4c in  $\text{CDCl}_3$**

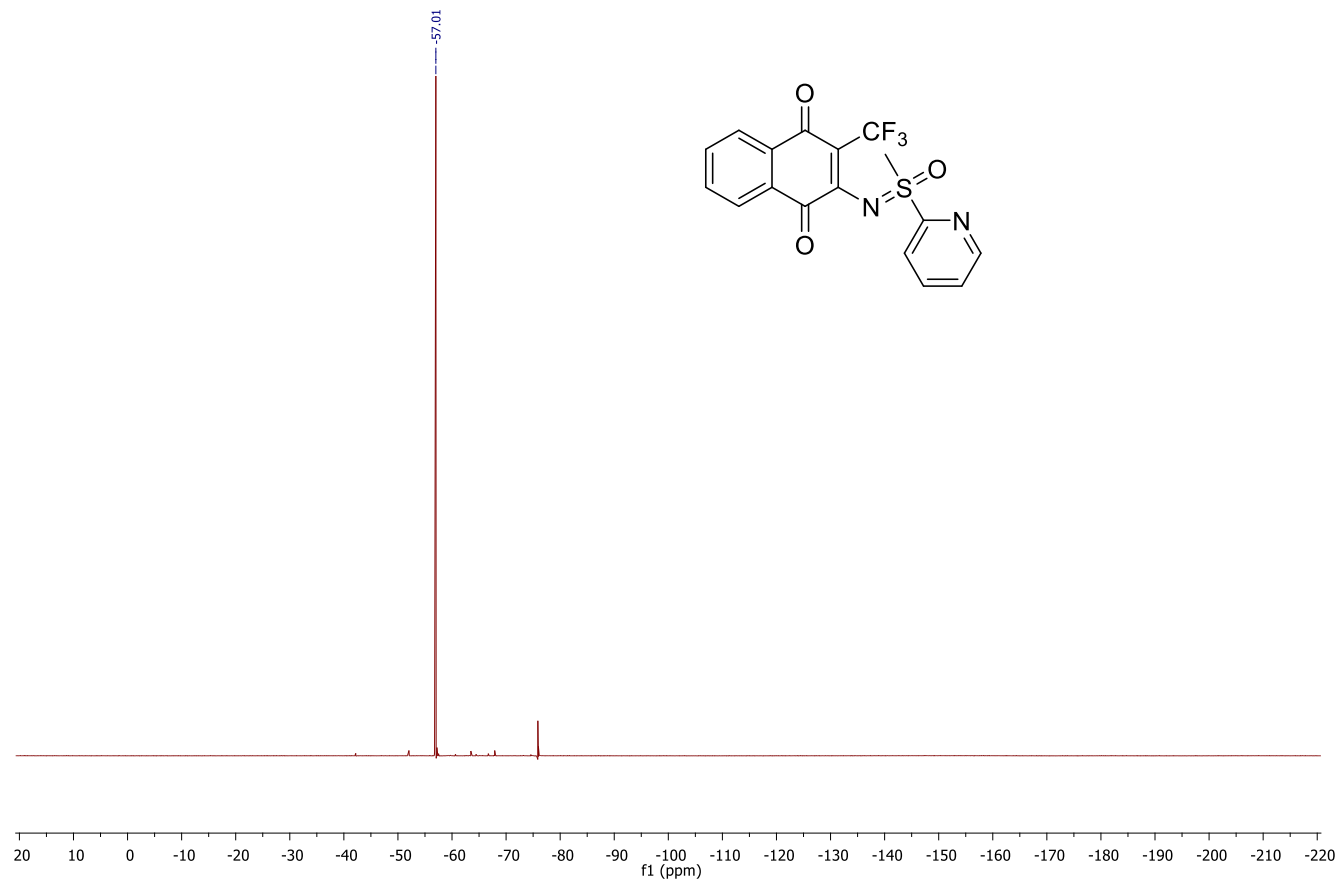

# $^{13}\text{C}$ $\{^1\text{H}\}$ NMR (101 MHz) of 4c in $\text{CDCl}_3$

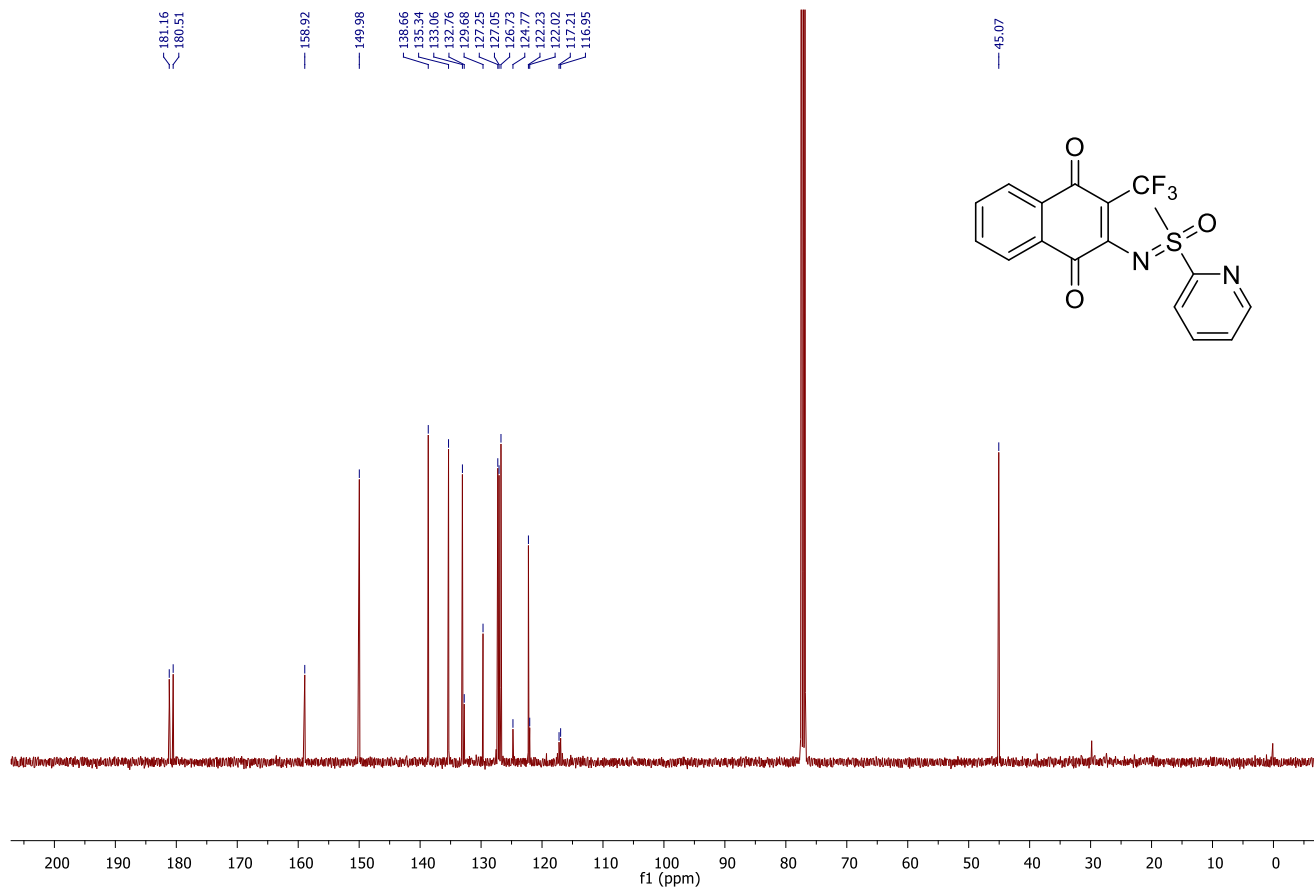

## Elemental Composition Report

### Single Mass Analysis

Tolerance = 100.0 PPM / DBE: min = -1.5, max = 50.0

Element prediction: Off

Number of isotope peaks used for i-FIT = 3

Monoisotopic Mass, Even Electron Ions

101 formula(e) evaluated with 1 results within limits (up to 3 closest results for each mass)

Elements Used:

C: 0-17 H: 0-100 N: 0-2 O: 0-3 F: 0-3 S: 0-1

NQS-3-CF3

QMI DIVISION, CSIR-IIIM JAMMU  
Xevo G2-XS QTOF YFC2015

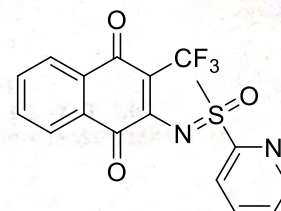

15-Mar-2023  
12:42:42

1: TOF MS ES+  
6.40e+006

150323\_09 6 (0.138)

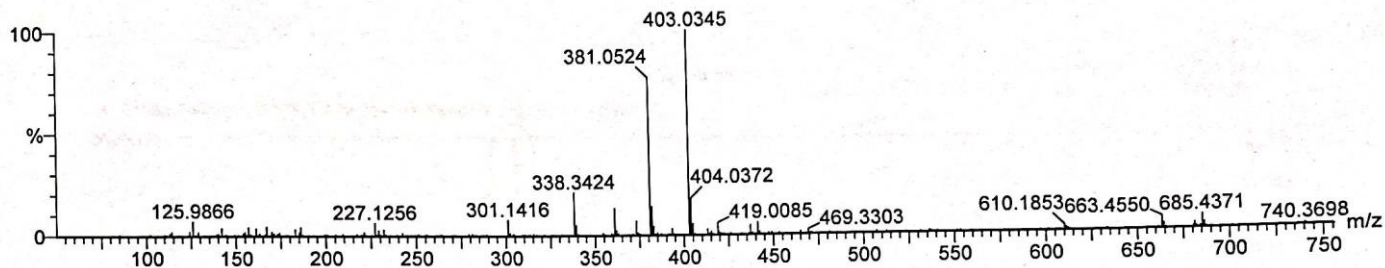

Minimum: -1.5  
Maximum: 2.0 100.0 50.0

| Mass     | Calc. Mass | mDa | PPM | DBE  | i-FIT  | Norm | Conf (%) | Formula            |
|----------|------------|-----|-----|------|--------|------|----------|--------------------|
| 381.0524 | 381.0521   | 0.3 | 0.8 | 11.5 | 1044.7 | n/a  | n/a      | C17 H12 N2 O3 F3 S |

# $^1\text{H}$ NMR (400 MHz) of 4d in $\text{CDCl}_3$

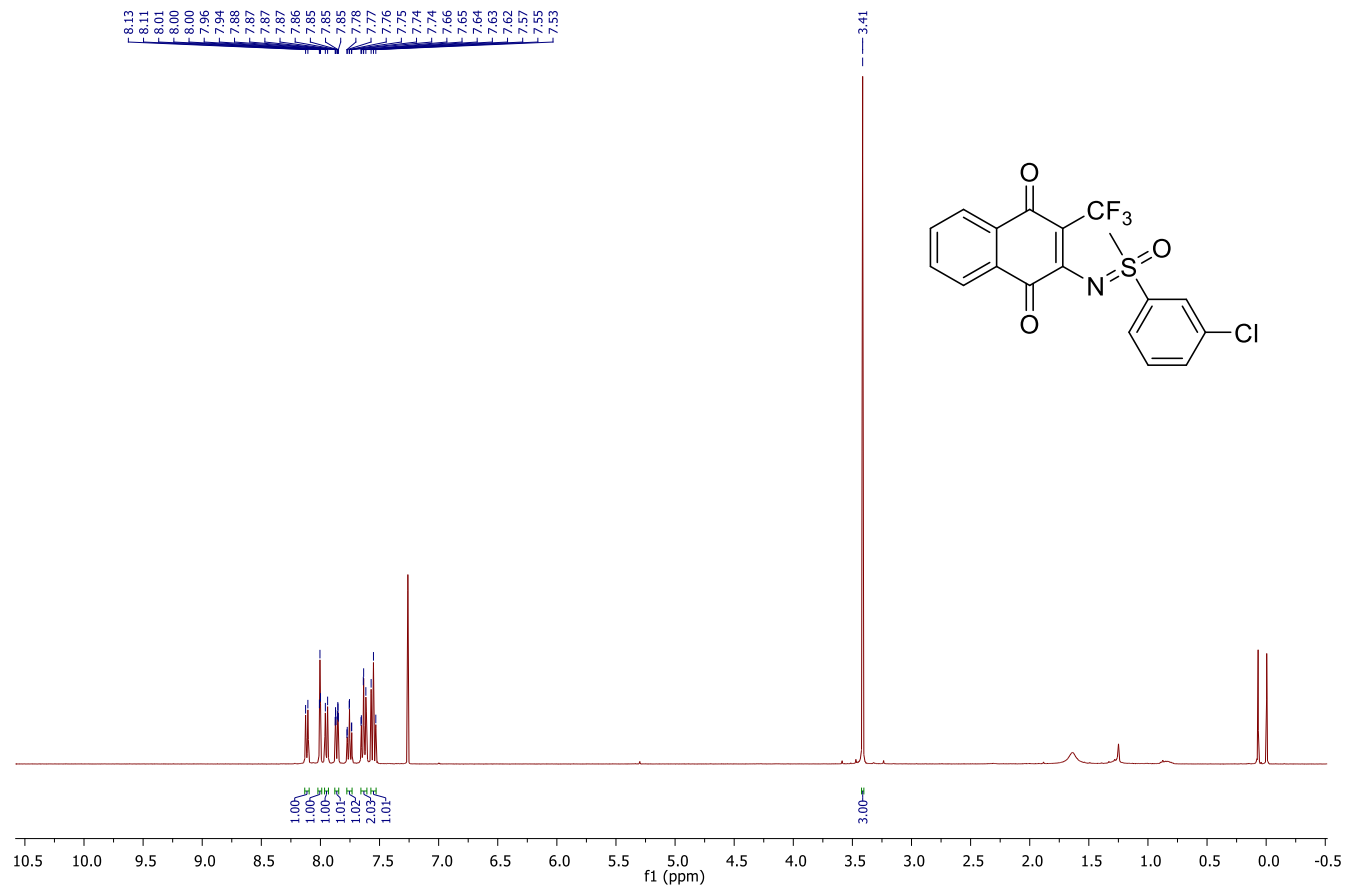



**$^{19}\text{F}$  NMR (377 MHz) of 4d in  $\text{CDCl}_3$**

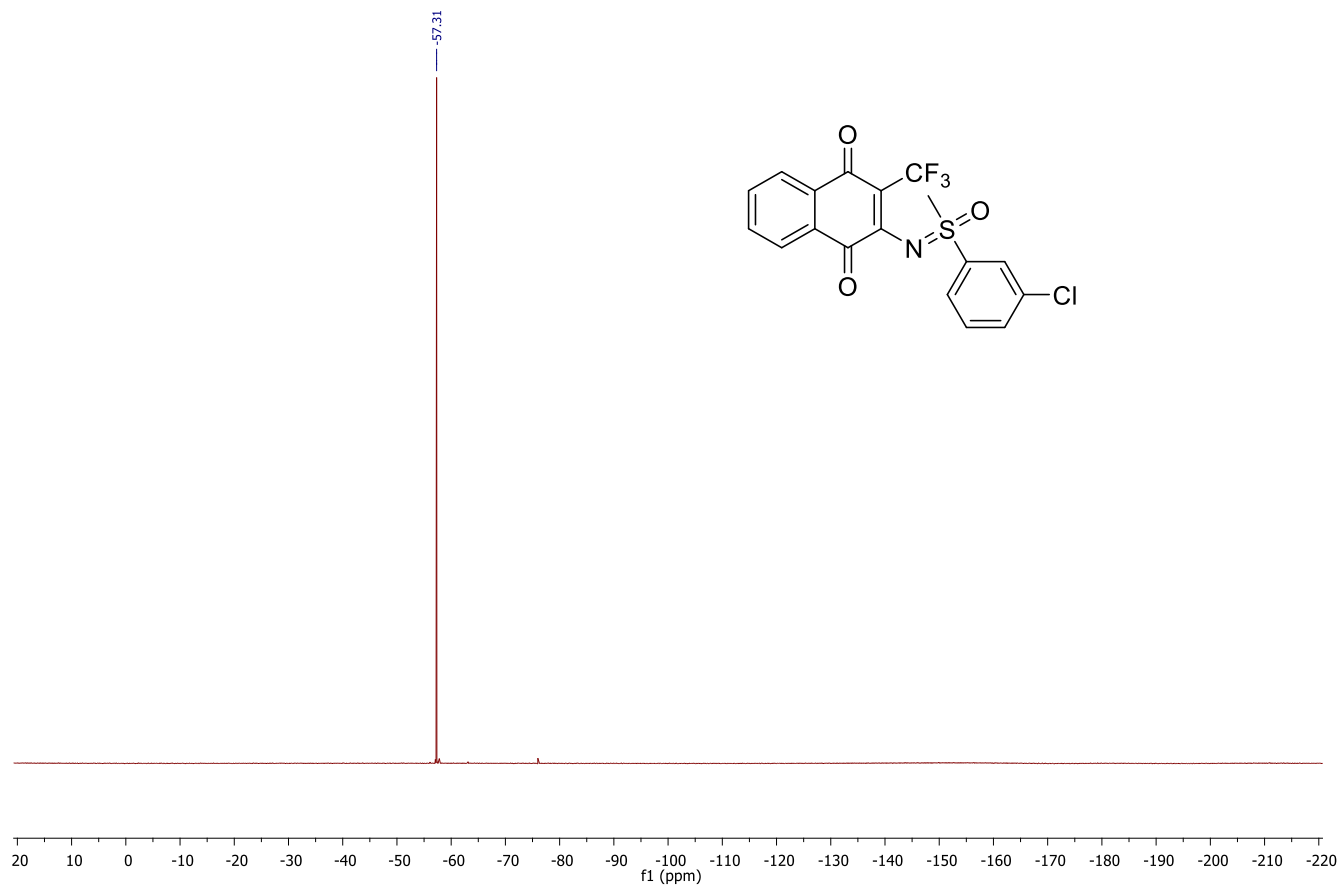

# $^{13}\text{C}$ $\{^1\text{H}\}$ NMR (101 MHz) of 4d in $\text{CDCl}_3$

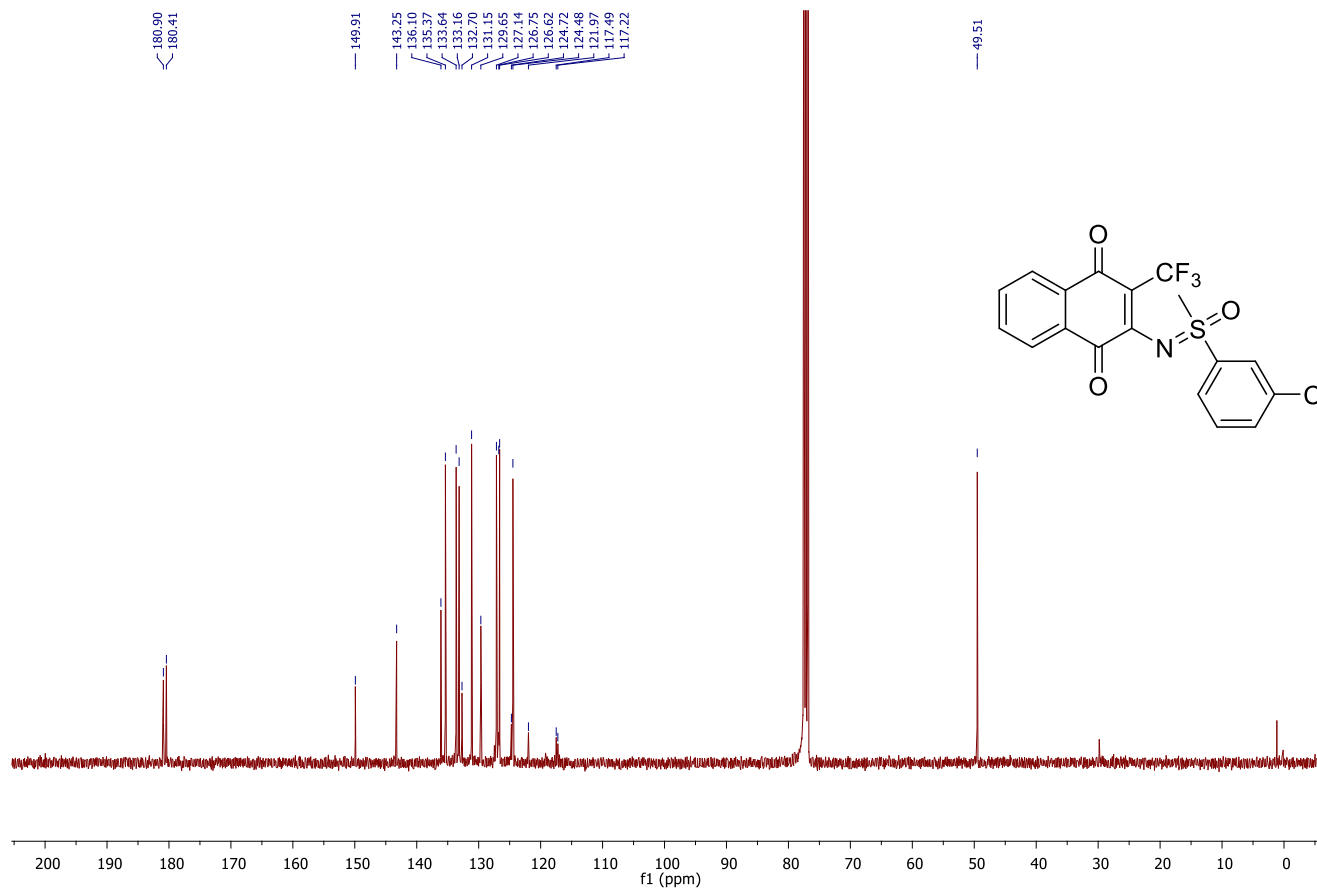

# HRMS of 4d

## Elemental Composition Report

### Single Mass Analysis

Tolerance = 50.0 PPM / DBE: min = -1.5, max = 50.0

Element prediction: Off

Number of isotope peaks used for i-FIT = 4

Monoisotopic Mass, Even Electron Ions

133 formula(e) evaluated with 1 results within limits (all results (up to 1000) for each mass)

Elements Used:

C: 0-18 H: 0-100 N: 0-1 O: 0-3 F: 0-3 S: 0-1 Cl: 0-1

280623\_03 9 (0.208)

1: TOF MS ES+

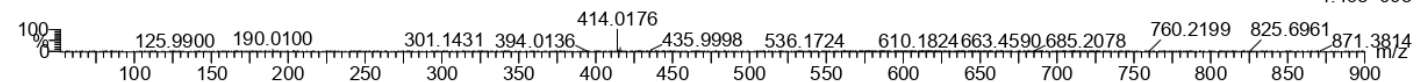

Minimum: -1.5  
Maximum: 5.0 50.0 50.0

| Mass     | Calc. Mass | mDa  | PPM  | DBE  | i-FIT | Norm | Conf (%) | Formula              |
|----------|------------|------|------|------|-------|------|----------|----------------------|
| 414.0176 | 414.0179   | -0.3 | -0.7 | 11.5 | 117.9 | n/a  | n/a      | C18 H12 N O3 F3 S Cl |

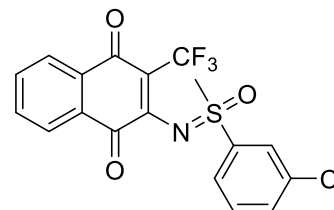

Page 1

# $^1\text{H}$ NMR (400 MHz) of 4e in $\text{CDCl}_3$

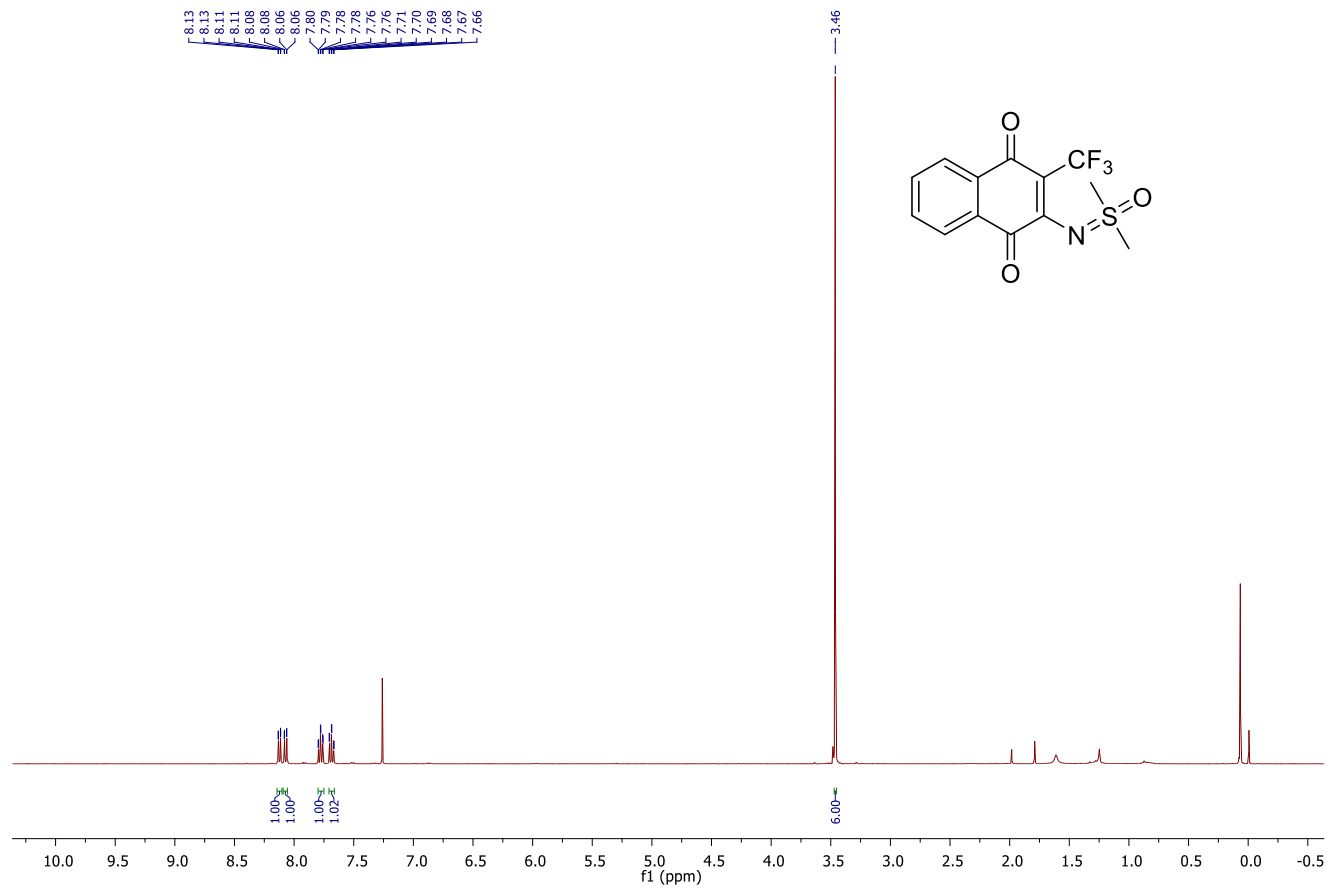

**$^{19}\text{F}$  NMR (377 MHz) of 4e in  $\text{CDCl}_3$**

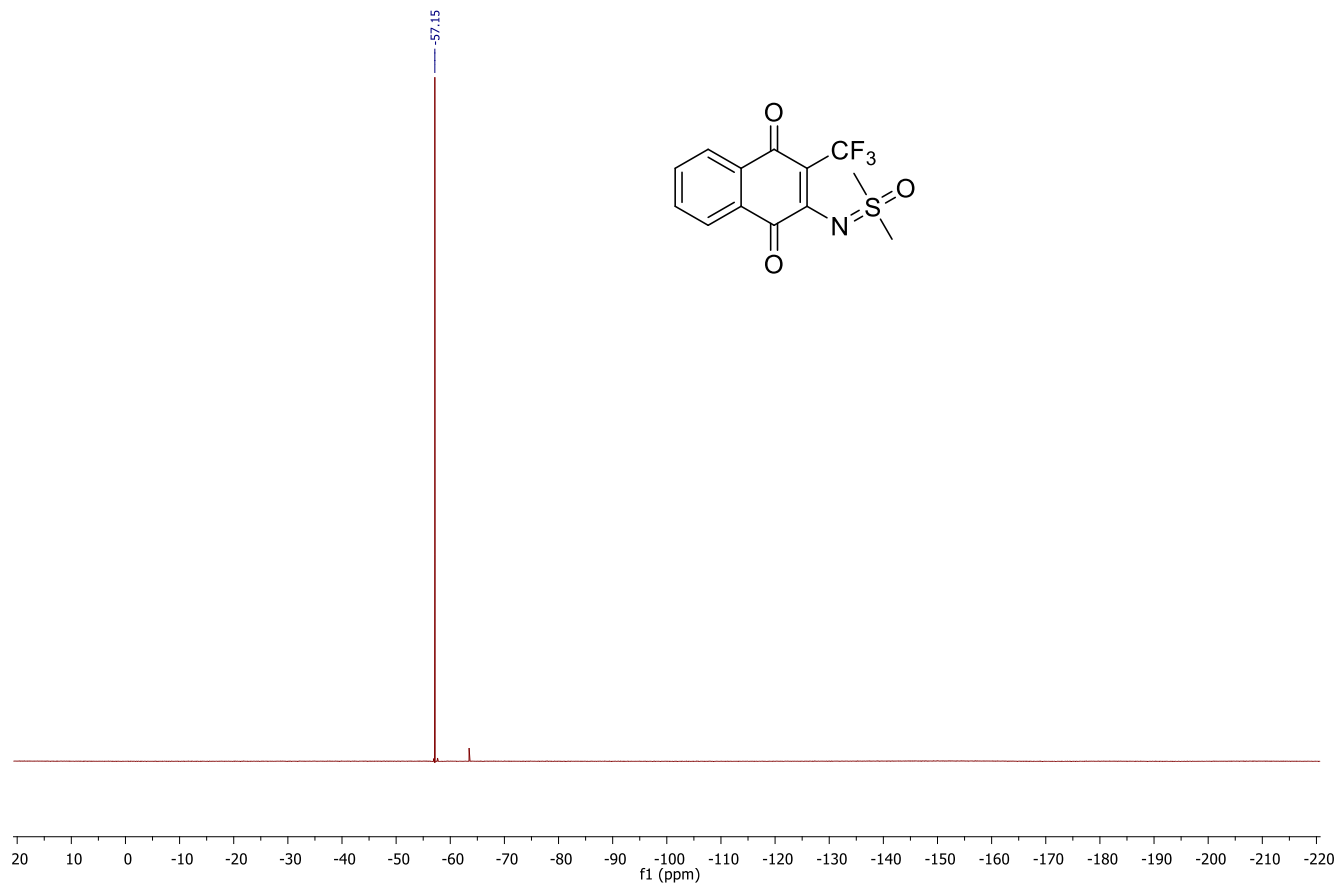

# $^{13}\text{C}$ $\{^1\text{H}\}$ NMR (101 MHz) of 4e in $\text{CDCl}_3$

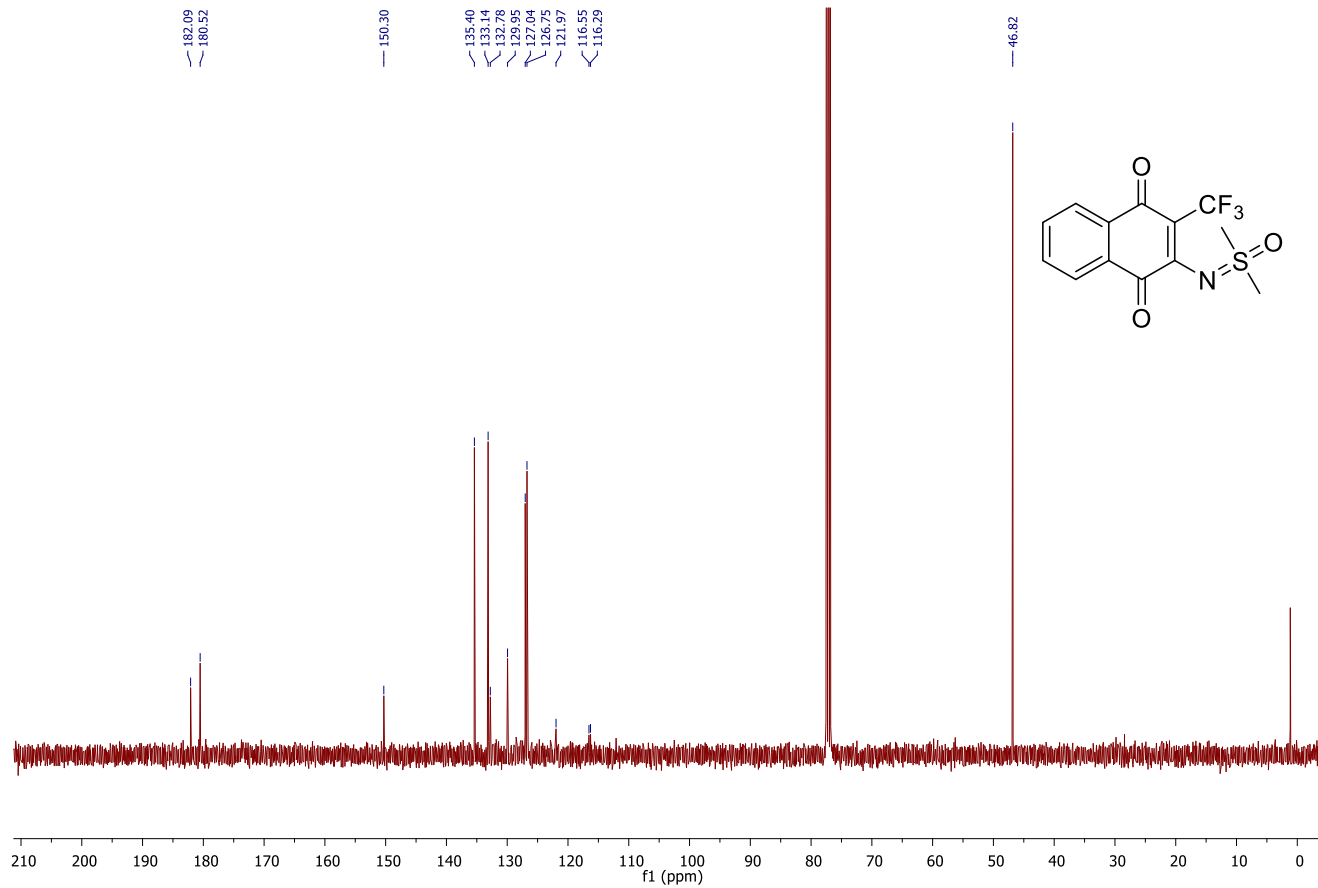

# HRMS of 4e

## Elemental Composition Report

### Single Mass Analysis

Tolerance = 100.0 PPM / DBE: min = -1.5, max = 50.0

Element prediction: Off

Number of isotope peaks used for i-FIT = 3

Monoisotopic Mass, Even Electron Ions

65 formula(e) evaluated with 1 results within limits (up to 3 closest results for each mass)

Elements Used:

C: 0-13 H: 0-100 N: 0-1 O: 0-3 S: 0-1 F: 0-3

NQS-6-CF3

QMI DIVISION, CSIR-IIIM JAMMU  
Xevo G2-XS QTOF YFC2015

15-Mar-2023

13:42:27

1: TOF MS ES+

1.28e+007

150323\_32 6 (0.138)

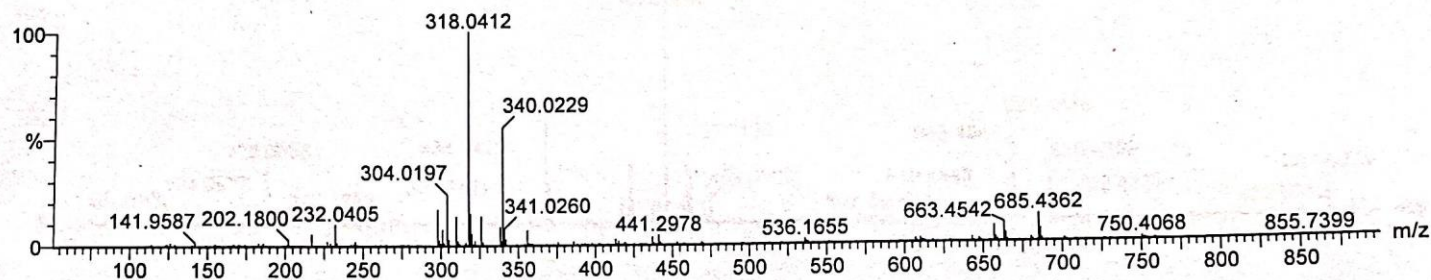

Minimum: -1.5  
Maximum: 2.0 100.0 50.0

| Mass     | Calc. Mass | mDa | PPM | DBE | i-FIT  | Norm | Conf(%) | Formula           |
|----------|------------|-----|-----|-----|--------|------|---------|-------------------|
| 318.0412 | 318.0412   | 0.0 | 0.0 | 7.5 | 1113.3 | n/a  | n/a     | C13 H11 N O3 S F3 |

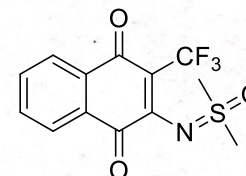

# $^1\text{H}$ NMR (400 MHz) of 4f in $\text{CDCl}_3$

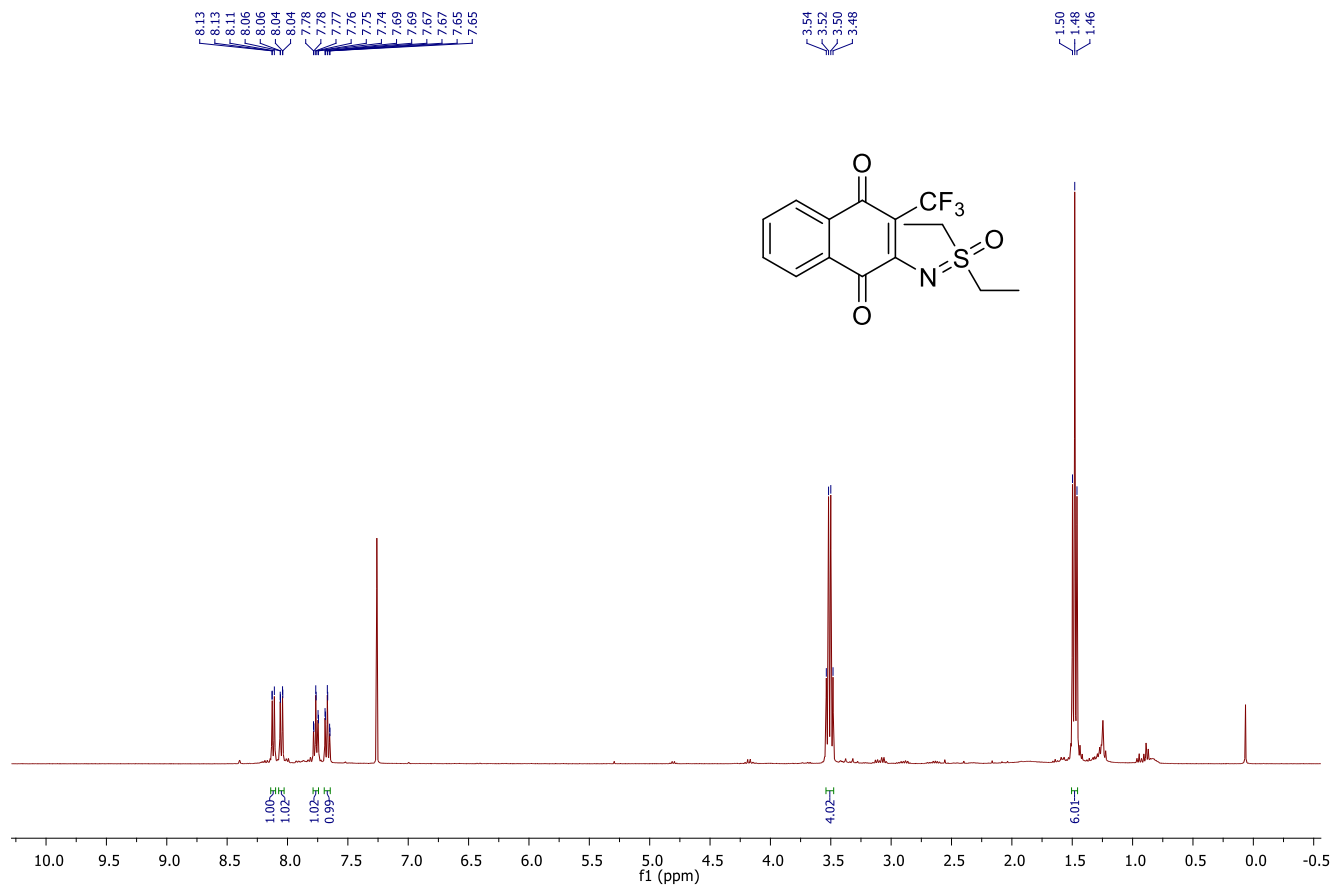



**$^{19}\text{F}$  NMR (377 MHz) of 4f in  $\text{CDCl}_3$**

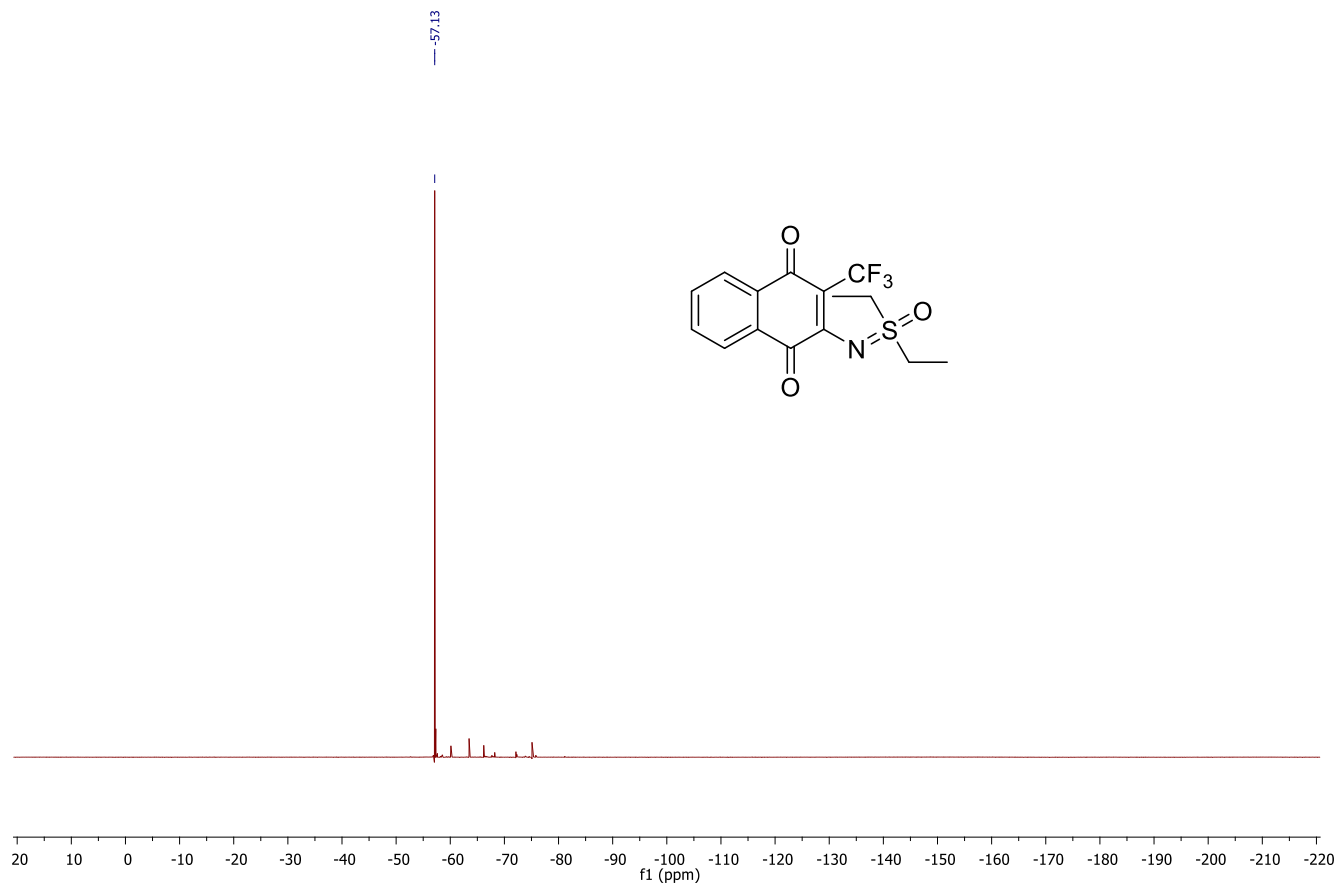

# $^{13}\text{C}$ $\{^1\text{H}\}$ NMR (101 MHz) of 4f in $\text{CDCl}_3$

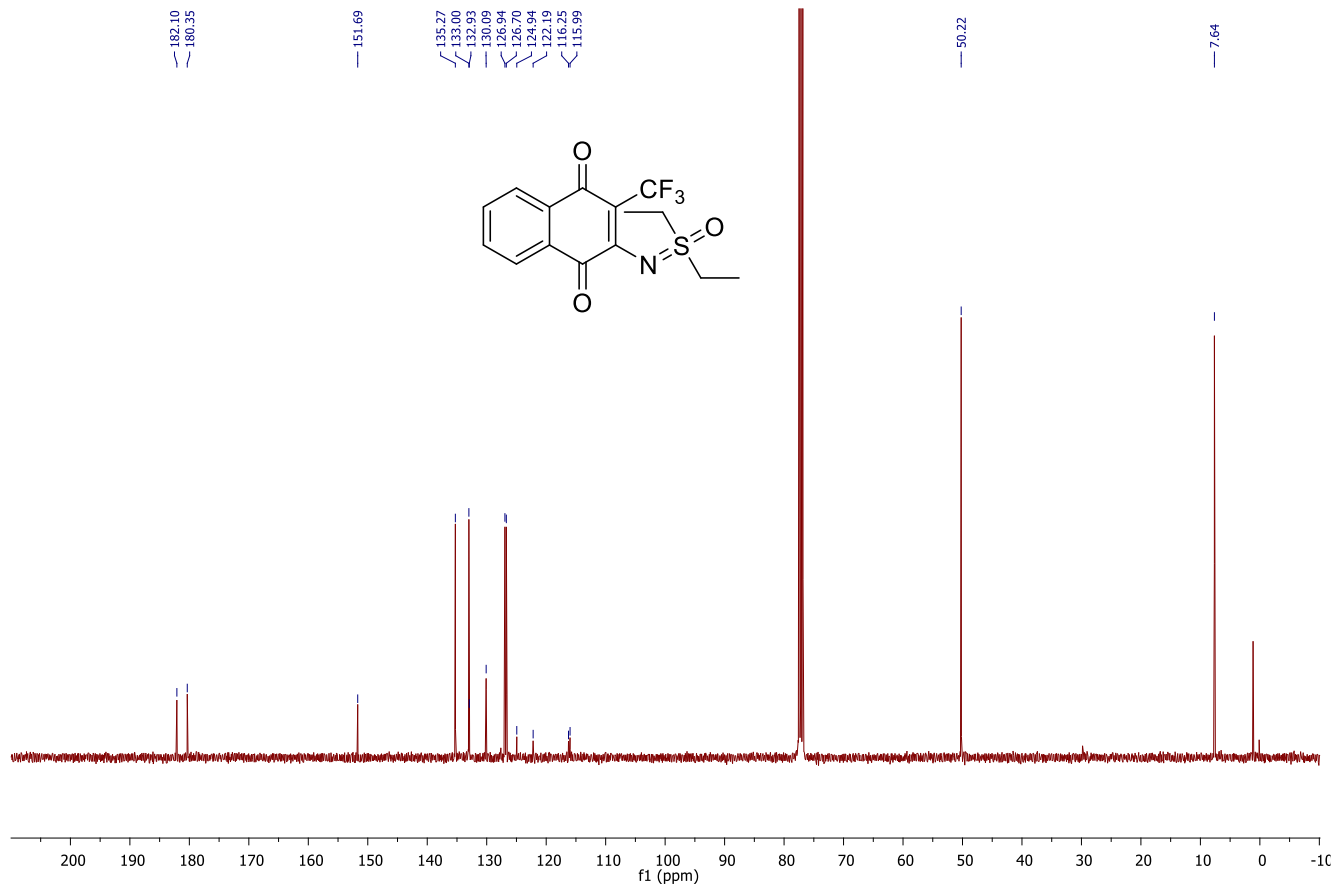

## Elemental Composition Report

### Single Mass Analysis

Tolerance = 100.0 PPM ./ DBE: min = -1.5, max = 50.0

Element prediction: Off

Number of isotope peaks used for i-FIT = 3

Monoisotopic Mass, Even Electron Ions

65 formula(e) evaluated with 1 results within limits (up to 3 closest results for each mass)

Elements Used:

C: 0-15 H: 0-100 N: 0-1 O: 0-3 F: 0-3 S: 0-1

NQS-7-CF3

QMI DIVISION, CSIR-IIIM JAMMU  
Xevo G2-XS QTOF YFC2015

150323\_08 6 (0.138)

15-Mar-2023  
12:39:59  
1: TOF MS ES+  
7.26e+006

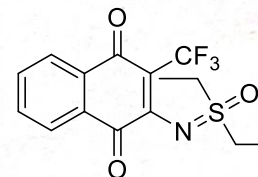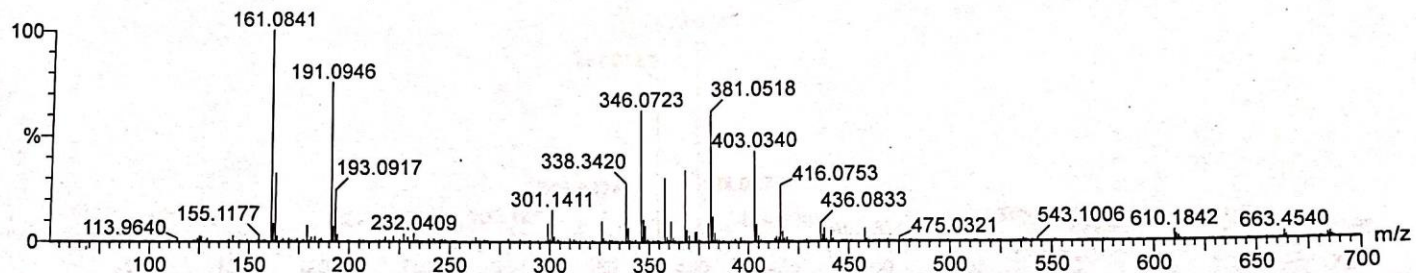

Minimum: -1.5  
Maximum: 2.0 100.0 50.0

| Mass     | Calc. Mass | mDa  | PPM  | DBE | i-FIT  | Norm | Conf (%) | Formula           |
|----------|------------|------|------|-----|--------|------|----------|-------------------|
| 346.0723 | 346.0725   | -0.2 | -0.6 | 7.5 | 1166.6 | n/a  | n/a      | C15 H15 N O3 F3 S |

# $^1\text{H}$ NMR (400 MHz) of 4g in $\text{CDCl}_3$

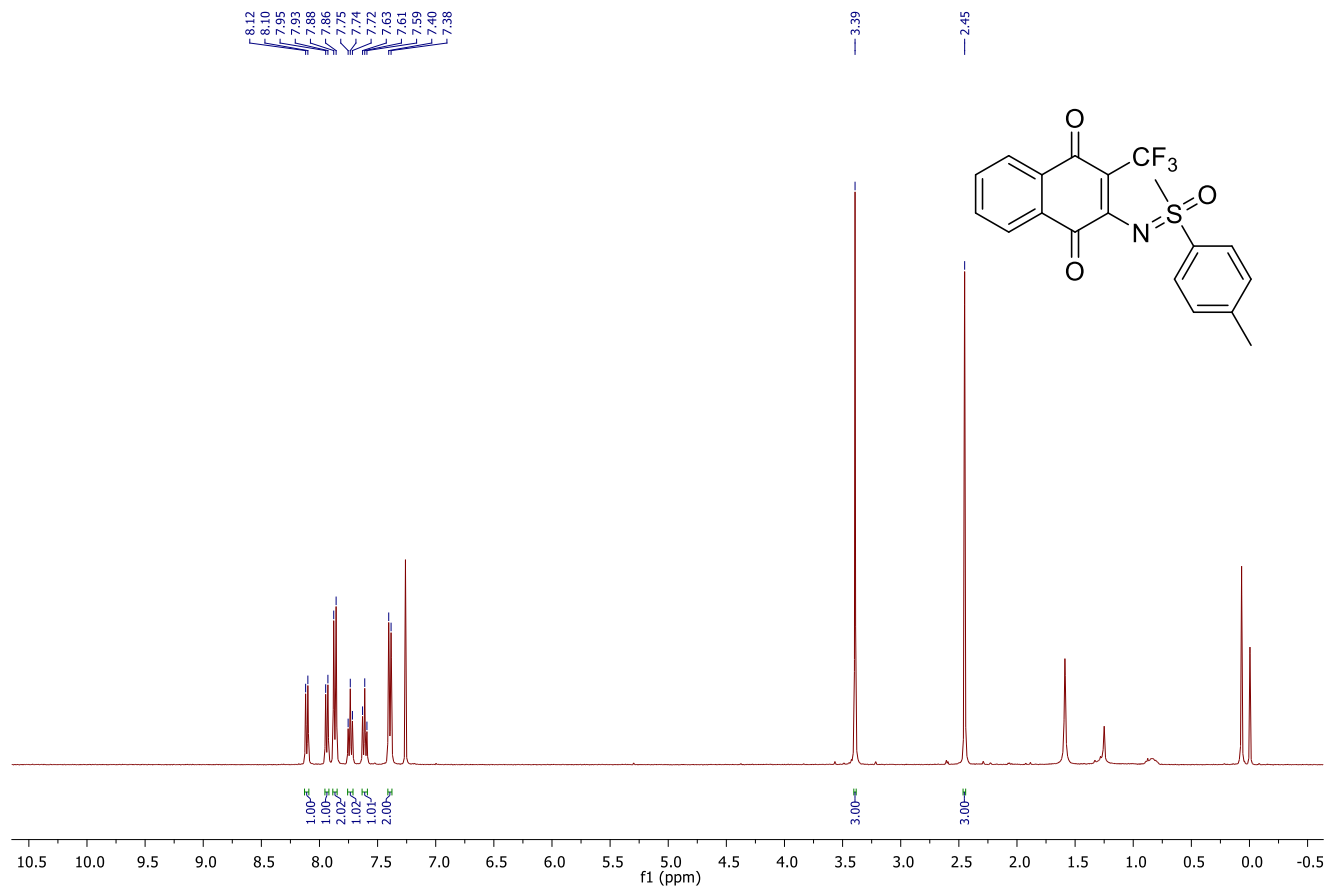

**$^{19}\text{F}$  NMR (377 MHz) of 4g in  $\text{CDCl}_3$**

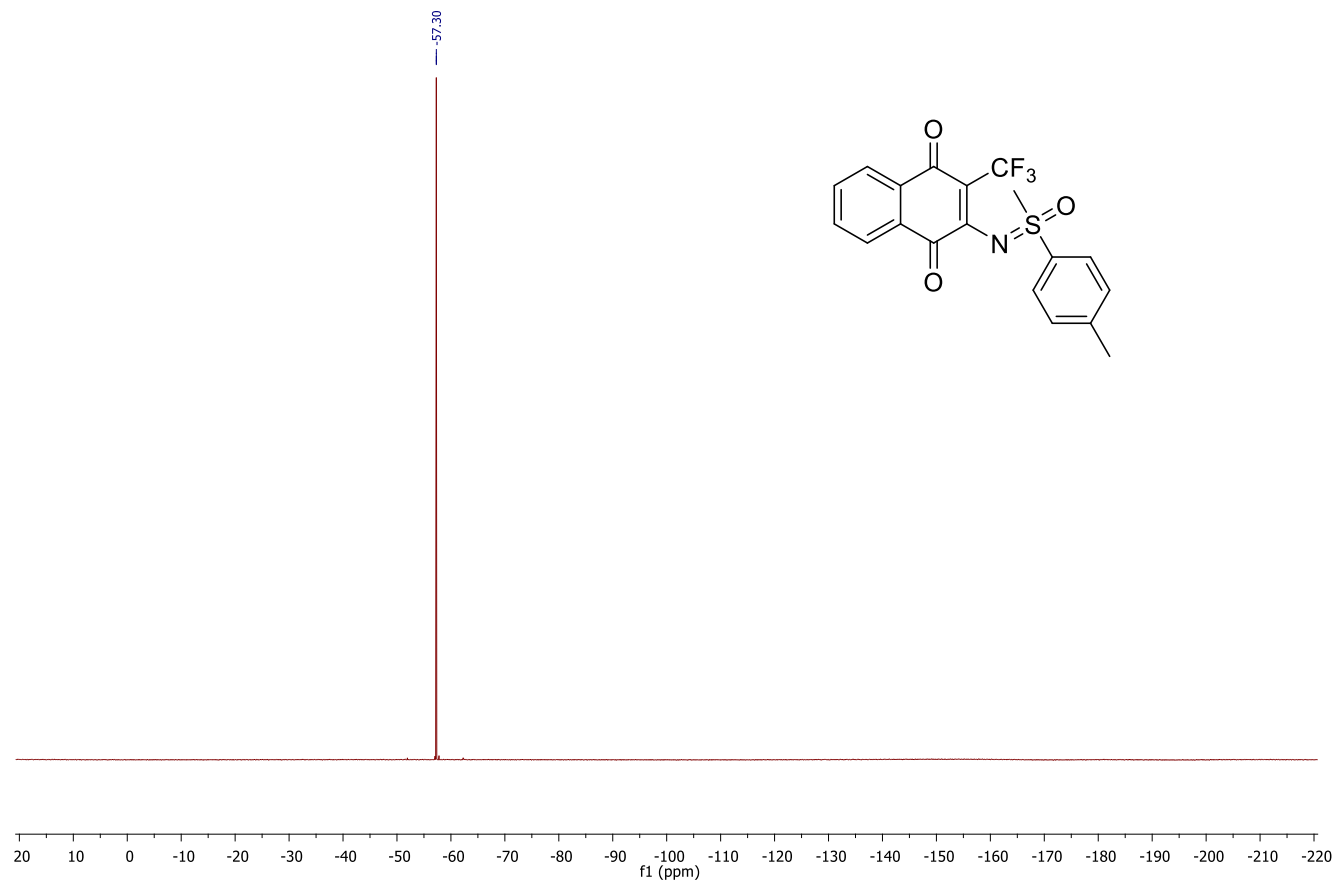

# $^{13}\text{C}$ $\{^1\text{H}\}$ NMR (101 MHz) of 4g in $\text{CDCl}_3$

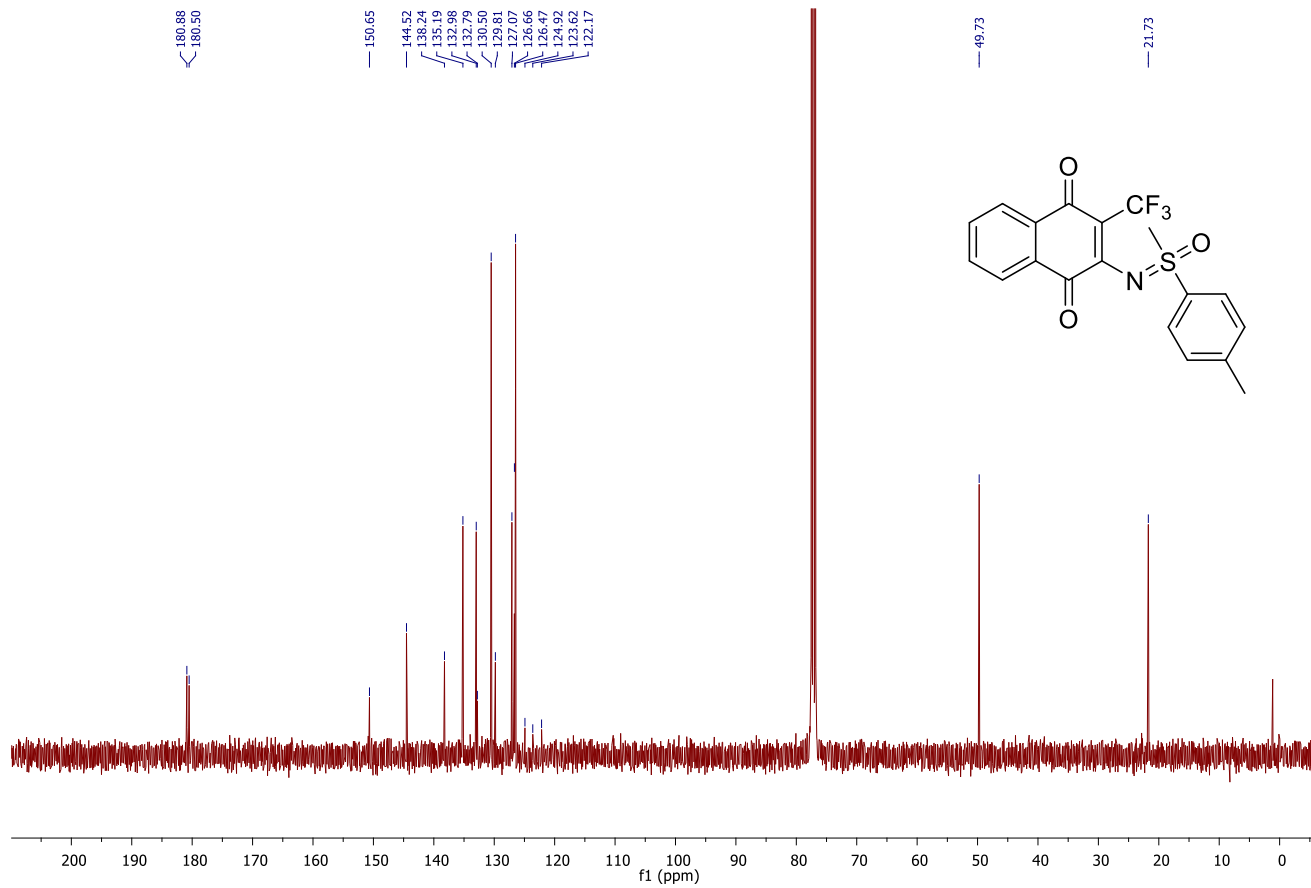

# HRMS of 4g

## Elemental Composition Report

Page 1

### Single Mass Analysis

Tolerance = 50.0 PPM / DBE: min = -1.5, max = 50.0

Element prediction: Off

Number of isotope peaks used for i-FIT = 4

Monoisotopic Mass, Even Electron Ions

69 formula(e) evaluated with 1 results within limits (all results (up to 1000) for each mass)

Elements Used:

C: 0-19 H: 0-100 N: 0-1 O: 0-3 F: 0-3 S: 0-1

280623\_05 17 (0.363)

1: TOF MS ES+

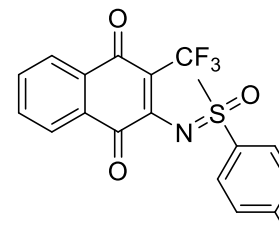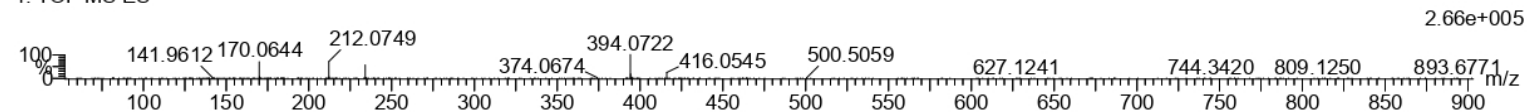

Minimum: -1.5  
Maximum: 5.0 50.0 50.0

| Mass     | Calc. Mass | mDa  | PPM  | DBE  | i-FIT | Norm | Conf (%) | Formula           |
|----------|------------|------|------|------|-------|------|----------|-------------------|
| 394.0722 | 394.0725   | -0.3 | -0.8 | 11.5 | 107.5 | n/a  | n/a      | C19 H15 N O3 F3 S |

# $^1\text{H}$ NMR (400 MHz) of 4h in $\text{CDCl}_3$

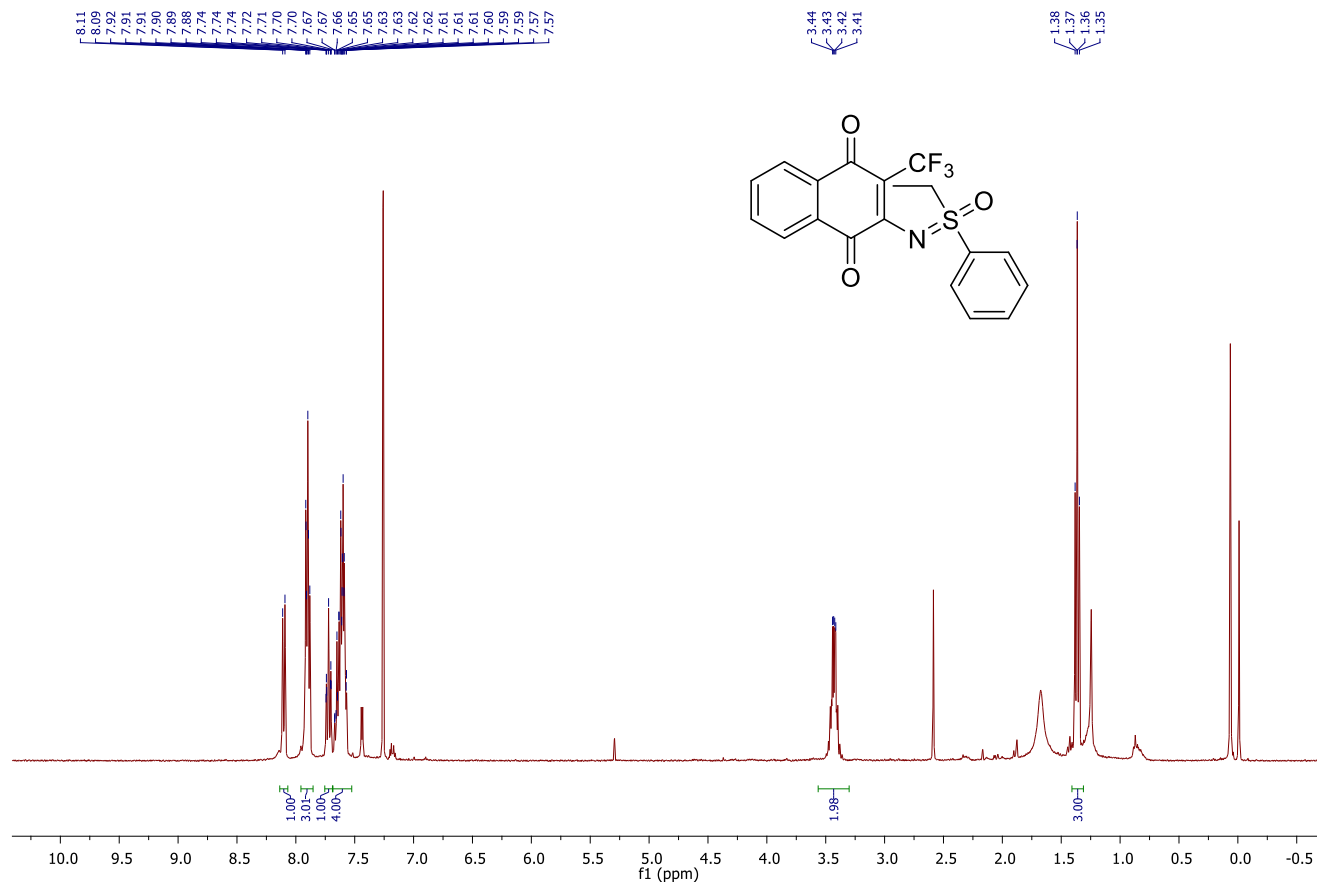



**$^{19}\text{F}$  NMR (377 MHz) of 4h in  $\text{CDCl}_3$**

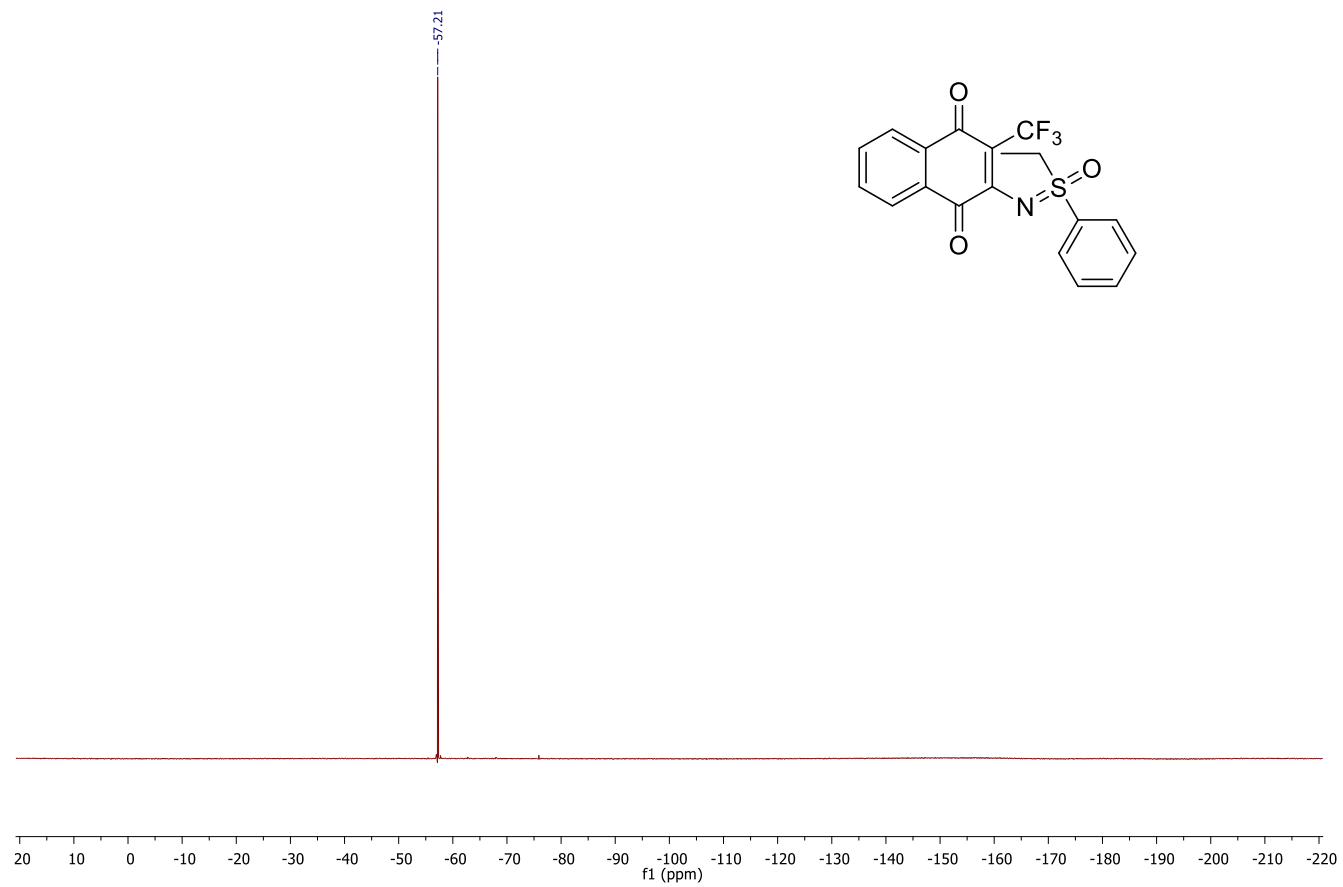

# $^{13}\text{C}$ $\{^1\text{H}\}$ NMR (101 MHz) of 4h in $\text{CDCl}_3$

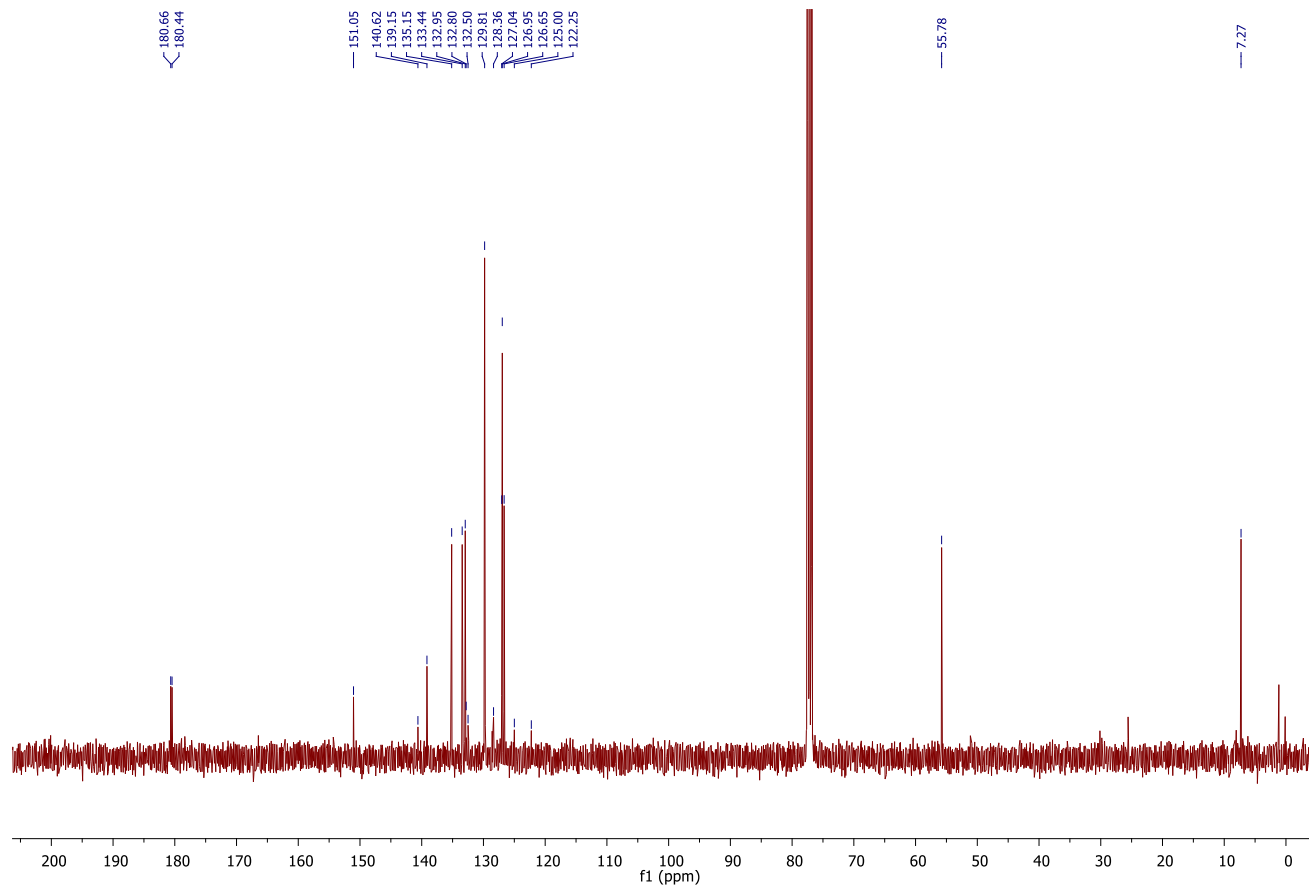

# HRMS of 4h

## Elemental Composition Report

Page 1

### Single Mass Analysis

Tolerance = 100.0 PPM / DBE: min = -1.5, max = 50.0

Element prediction: Off

Number of isotope peaks used for i-FIT = 3

Monoisotopic Mass, Even Electron Ions

69 formula(e) evaluated with 1 results within limits (up to 3 closest results for each mass)

Elements Used:

C: 0-19 H: 0-100 N: 0-1 O: 0-3 S: 0-1 F: 0-3

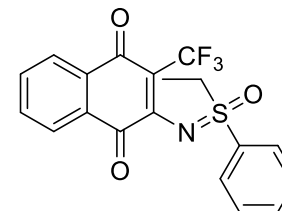

NQS-10-CF3

QMI DIVISION, CSIR-IIIM JAMMU  
Xevo G2-XS QTOF YFC2015

28-Mar-2023

12:40:06

280323\_13 6 (0.138)

1: TOF MS ES+

2.49e+006

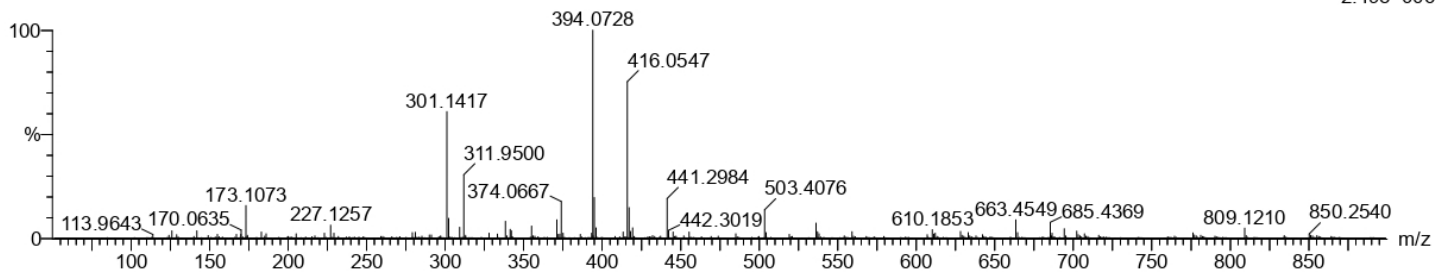

Minimum: -1.5

Maximum: 2.0 100.0 50.0

| Mass     | Calc. Mass | mDa | PPM | DBE  | i-FIT | Norm | Conf(%) | Formula           |
|----------|------------|-----|-----|------|-------|------|---------|-------------------|
| 394.0728 | 394.0725   | 0.3 | 0.8 | 11.5 | 894.9 | n/a  | n/a     | C19 H15 N O3 S F3 |

# $^1\text{H}$ NMR (400 MHz) of 4i in $\text{CDCl}_3$

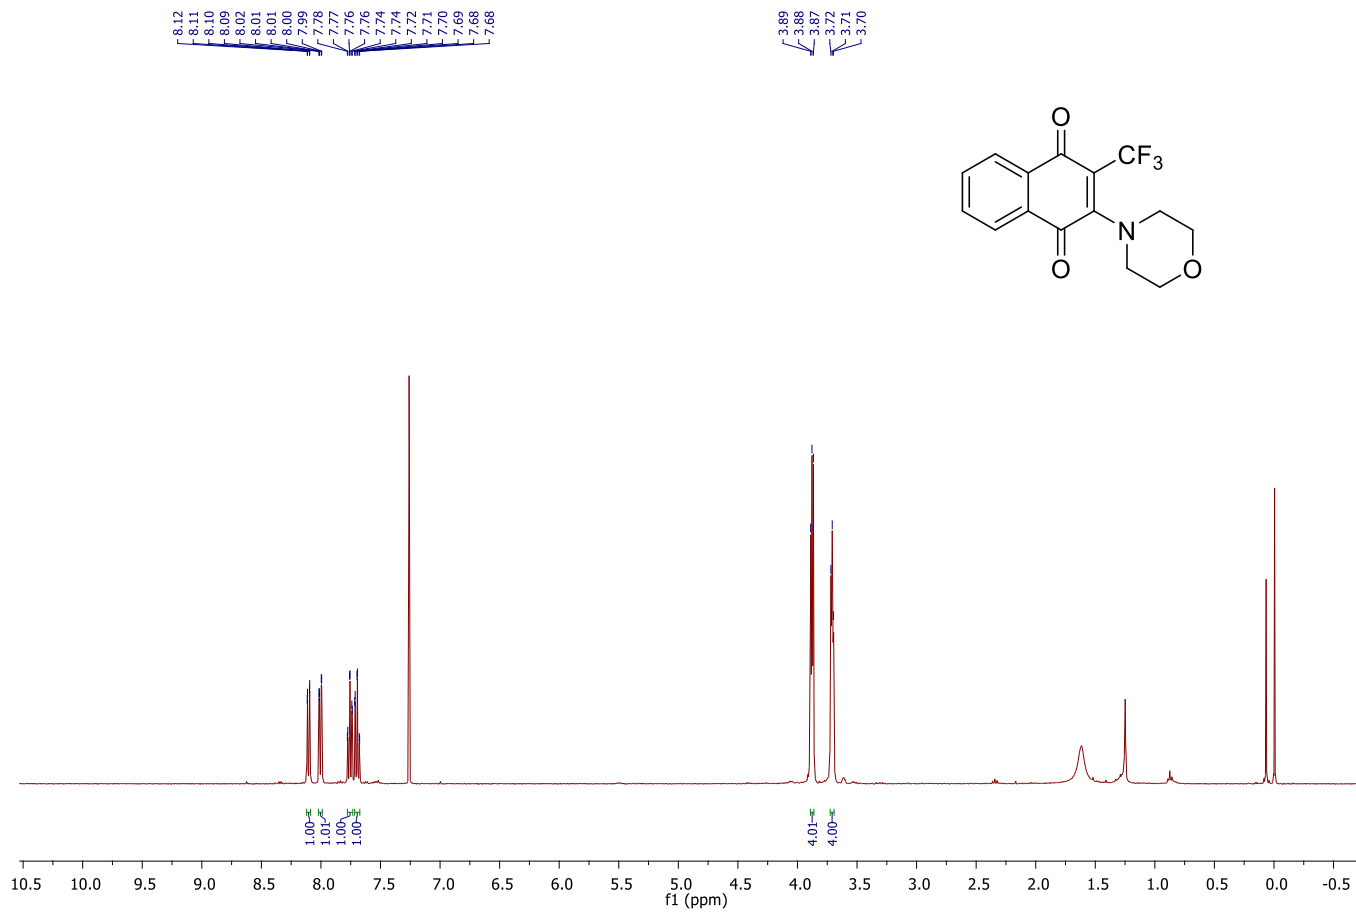

**$^{19}\text{F}$  NMR (377 MHz) of 4i in  $\text{CDCl}_3$**

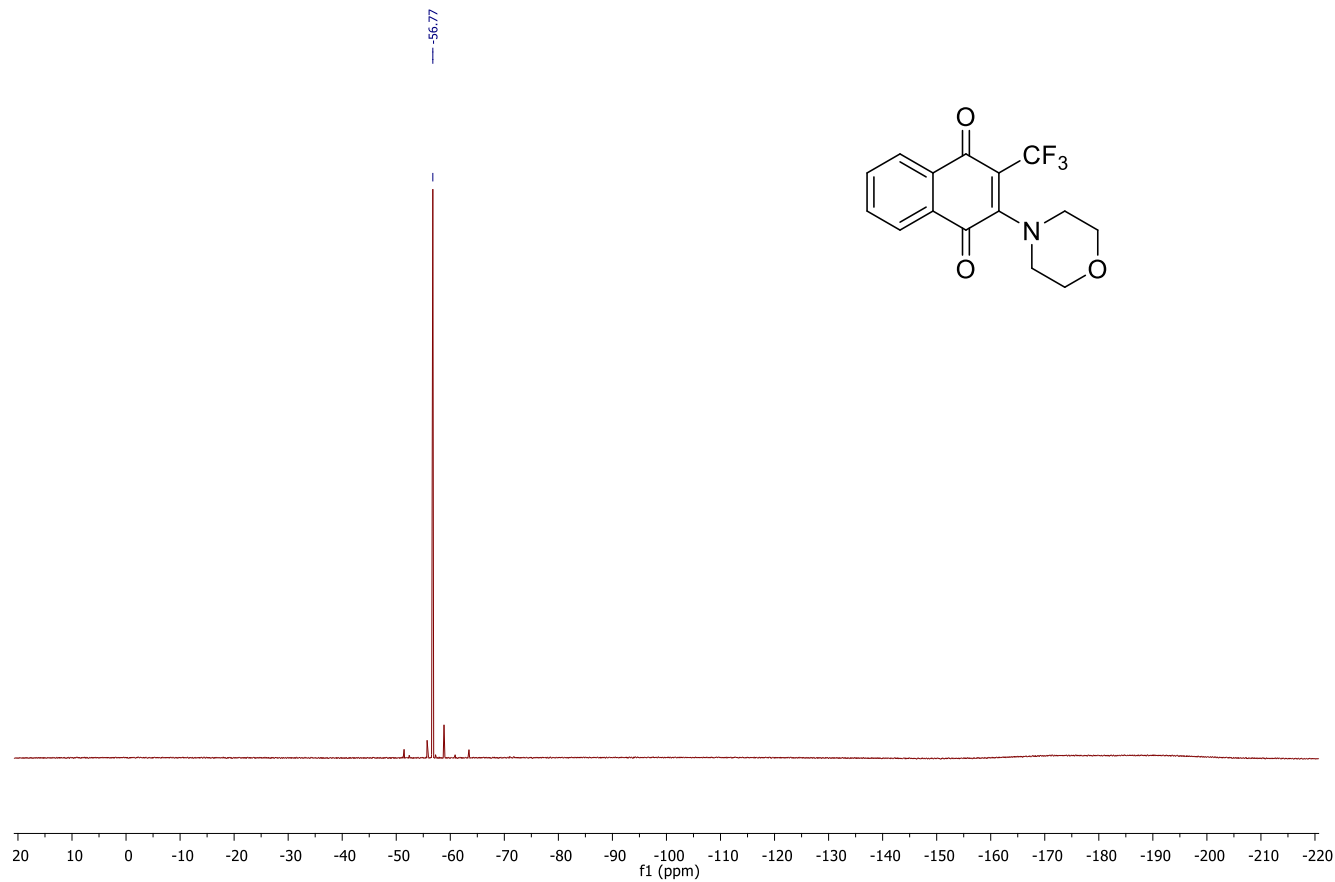

# $^{13}\text{C}$ $\{^1\text{H}\}$ NMR (101 MHz) of 4i in $\text{CDCl}_3$

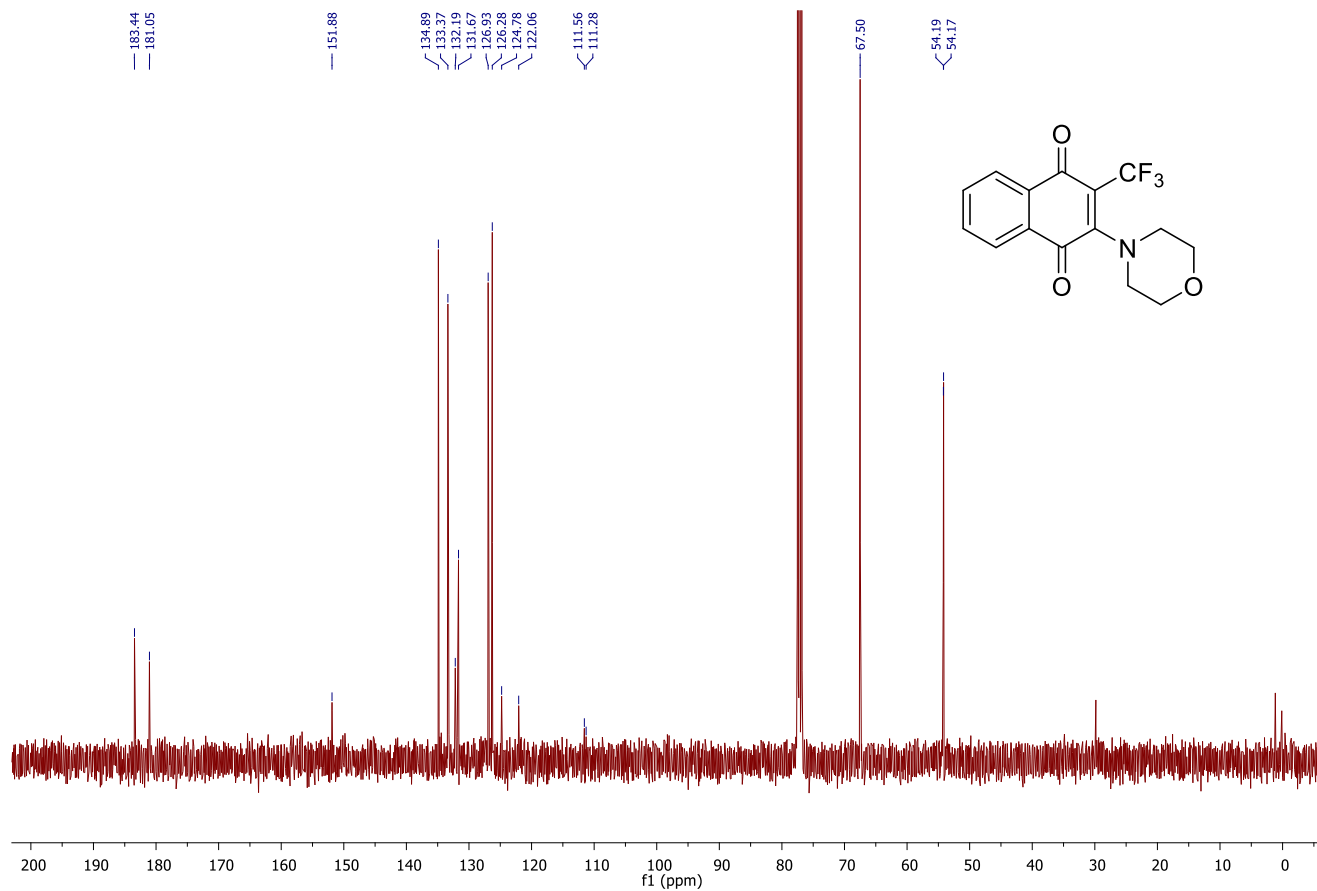

# HRMS of 4i

## Elemental Composition Report

Page 1

### Single Mass Analysis

Tolerance = 100.0 PPM / DBE: min = -1.5, max = 50.0

Element prediction: Off

Number of isotope peaks used for i-FIT = 3

Monoisotopic Mass, Even Electron Ions

33 formula(e) evaluated with 1 results within limits (up to 3 closest results for each mass)

Elements Used:

C: 0-15 H: 0-100 N: 0-1 O: 0-3 F: 0-3

NQA-1-CF<sub>3</sub>

QMI DIVISION, CSIR-IIIM JAMMU  
Xevo G2-XS QTOF YFC2015

28-Mar-2023

12:32:14

1: TOF MS ES+

3.28e+006

280323\_10 6 (0.138)

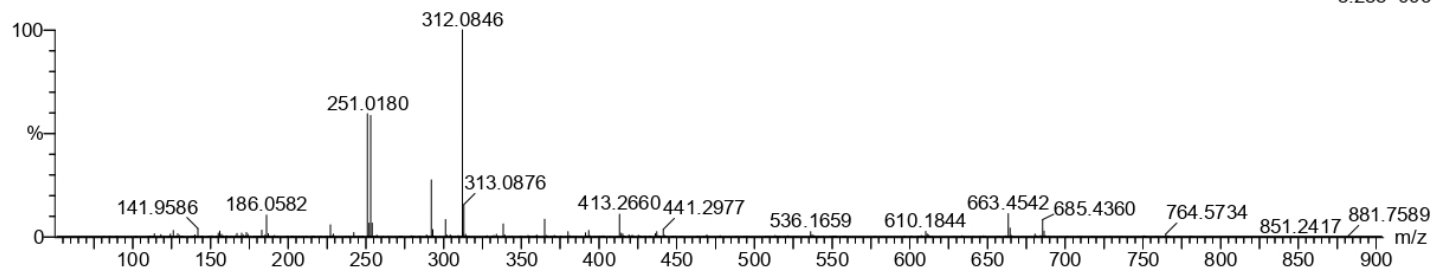

Minimum: -1.5  
Maximum: 2.0 100.0 50.0

| Mass     | Calc. Mass | mDa  | PPM  | DBE | i-FIT  | Norm | Conf(%) | Formula         |
|----------|------------|------|------|-----|--------|------|---------|-----------------|
| 312.0846 | 312.0848   | -0.2 | -0.6 | 8.5 | 1004.4 | n/a  | n/a     | C15 H13 N O3 F3 |

# $^1\text{H}$ NMR (400 MHz) of 4j in $\text{CDCl}_3$

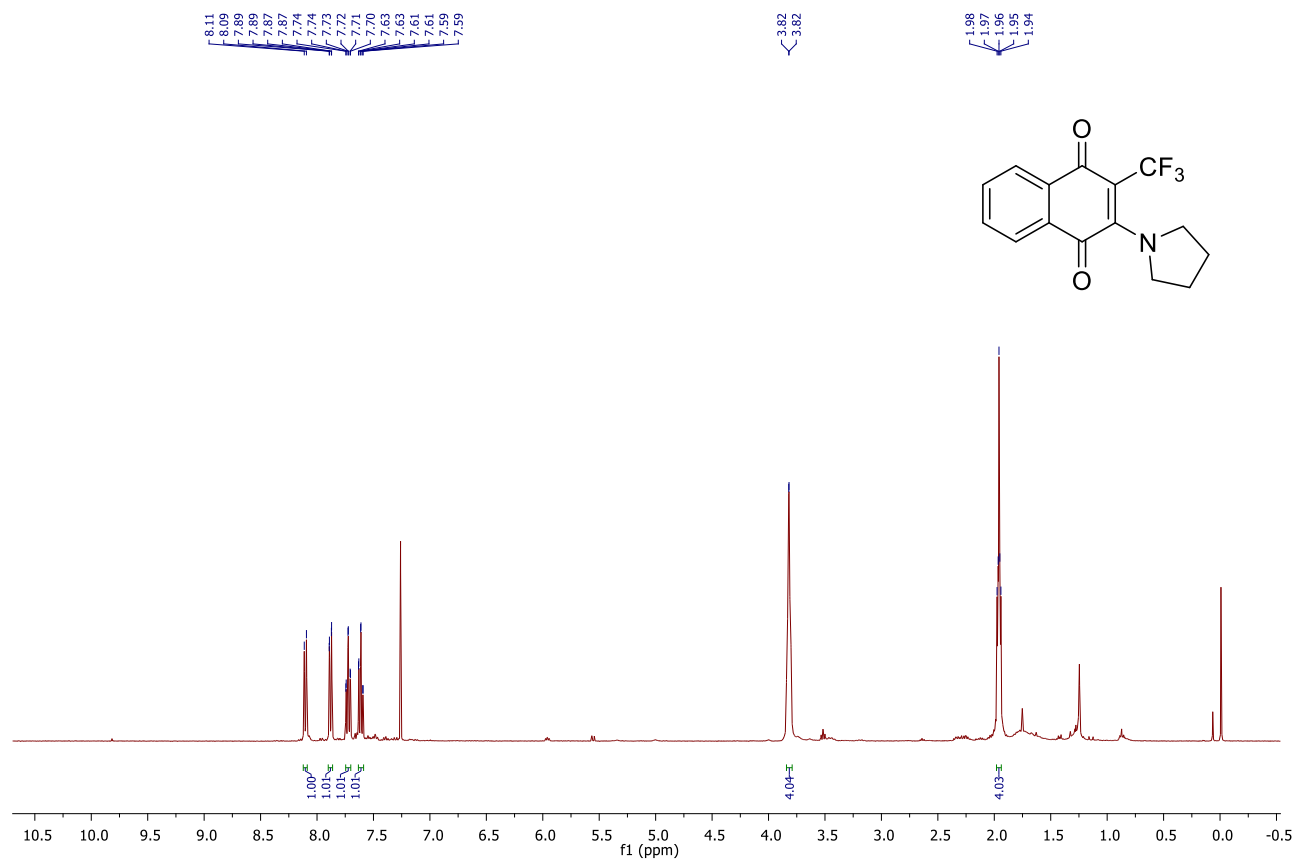



**$^{19}\text{F}$  NMR (377 MHz) of 4j in  $\text{CDCl}_3$**

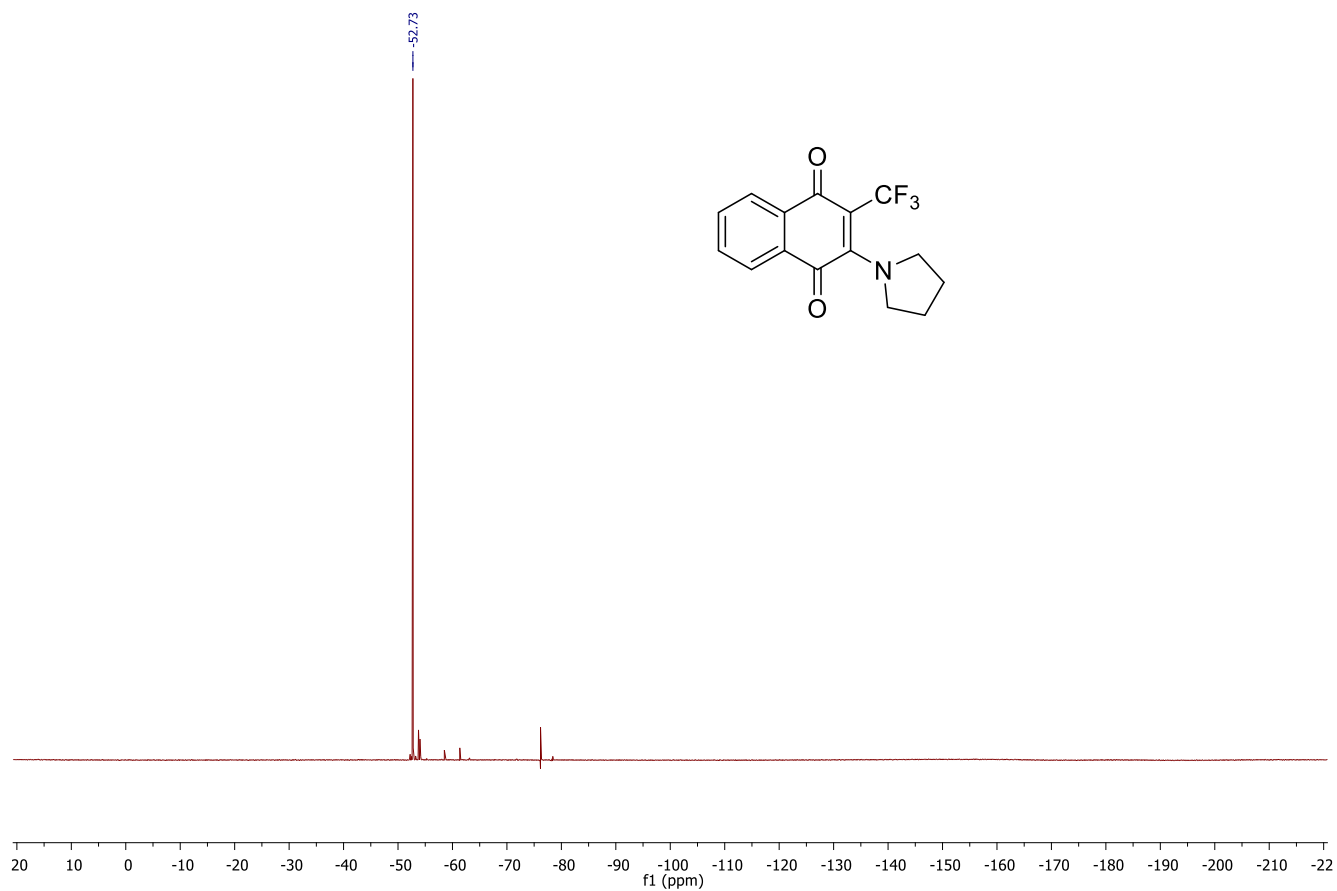

# $^{13}\text{C}$ $\{^1\text{H}\}$ NMR (101 MHz) of 4j in $\text{CDCl}_3$

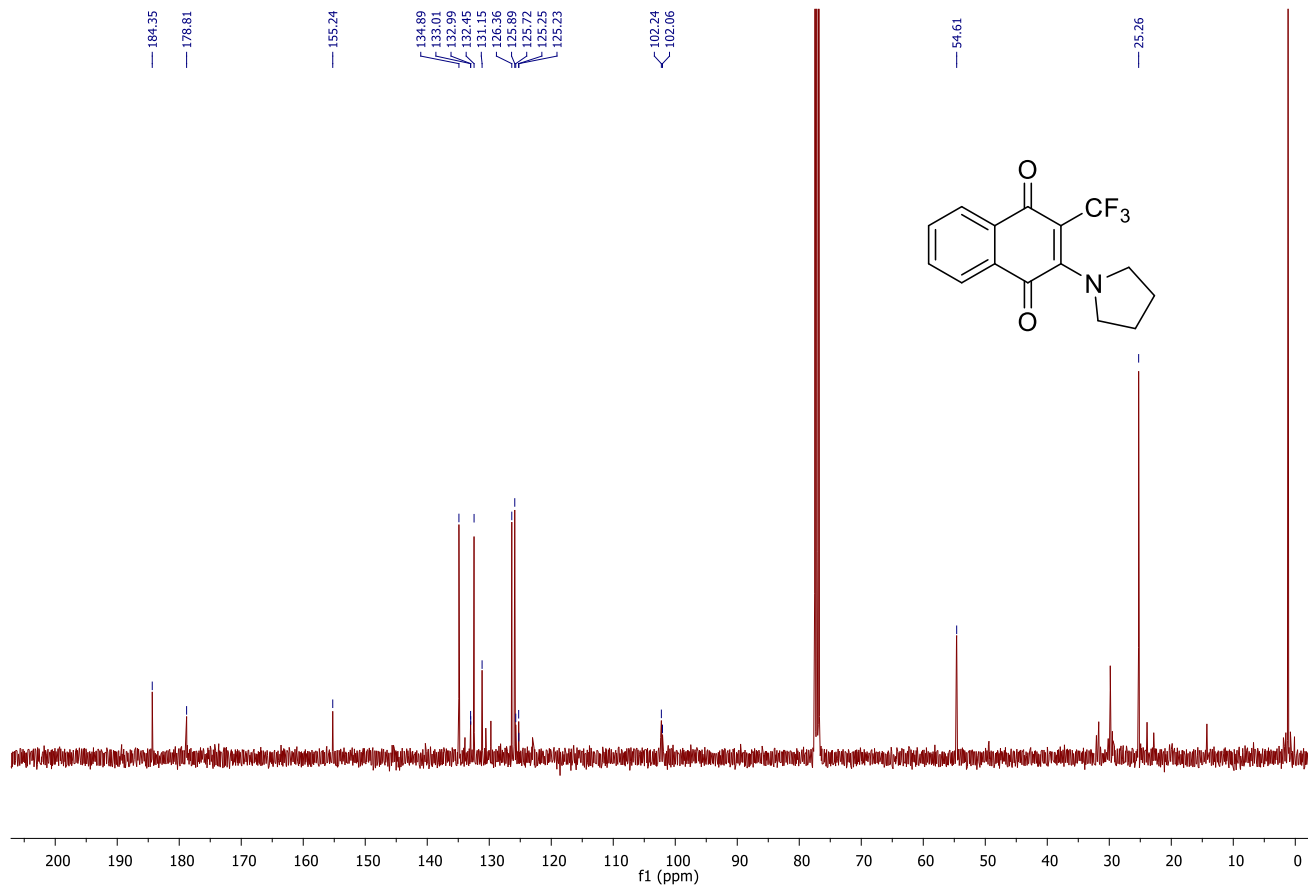

# HRMS of 4j

## Elemental Composition Report

Page 1

### Single Mass Analysis

Tolerance = 50.0 PPM / DBE: min = -1.5, max = 50.0

Element prediction: Off

Number of isotope peaks used for i-FIT = 3

Monoisotopic Mass, Even Electron Ions

25 formula(e) evaluated with 1 results within limits (up to 3 closest results for each mass)

Elements Used:

C: 0-15 H: 0-100 N: 0-1 O: 0-2 F: 0-3

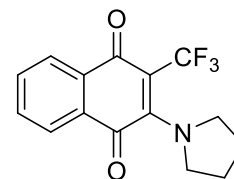

NQA-PYRRP-CF3

QMI DIVISION, CSIR-IIIM JAMMU  
Xevo G2-XS QTOF YFC2015

12-Jul-2023

11:54:48

120723\_05 10 (0.225)

1: TOF MS ES+  
1.59e+006

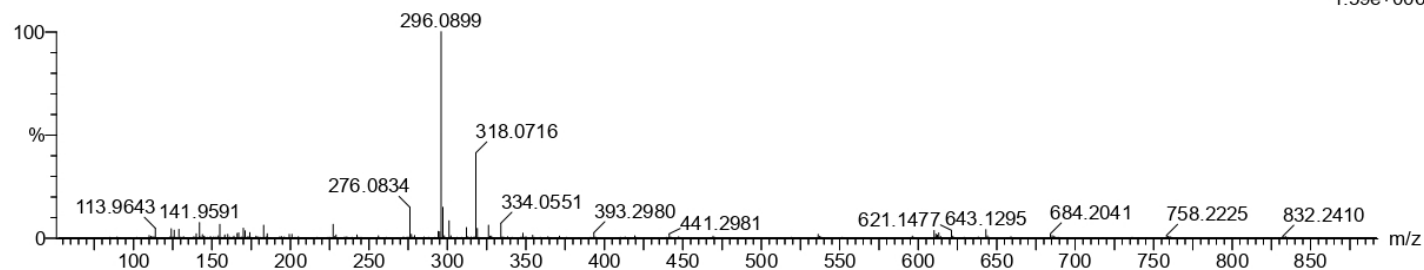

Minimum: -1.5  
Maximum: 2.0 50.0 50.0

| Mass     | Calc. Mass | mDa | PPM | DBE | i-FIT | Norm | Conf(%) | Formula         |
|----------|------------|-----|-----|-----|-------|------|---------|-----------------|
| 296.0899 | 296.0898   | 0.1 | 0.3 | 8.5 | 869.3 | n/a  | n/a     | C15 H13 N O2 F3 |

# $^1\text{H}$ NMR (400 MHz) of 4k in $\text{CDCl}_3$

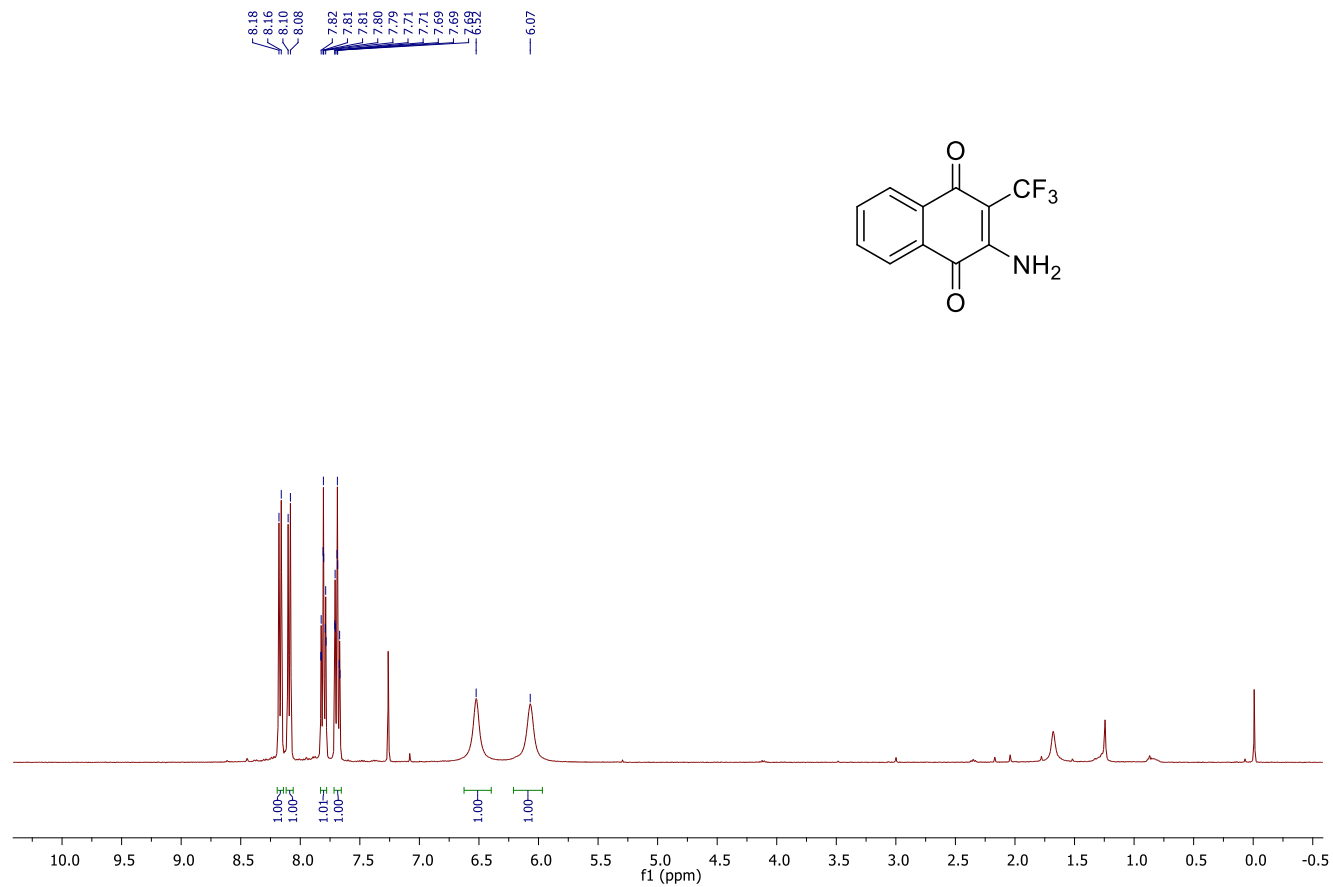

**$^{19}\text{F}$  NMR (377 MHz) of 4k in  $\text{CDCl}_3$**

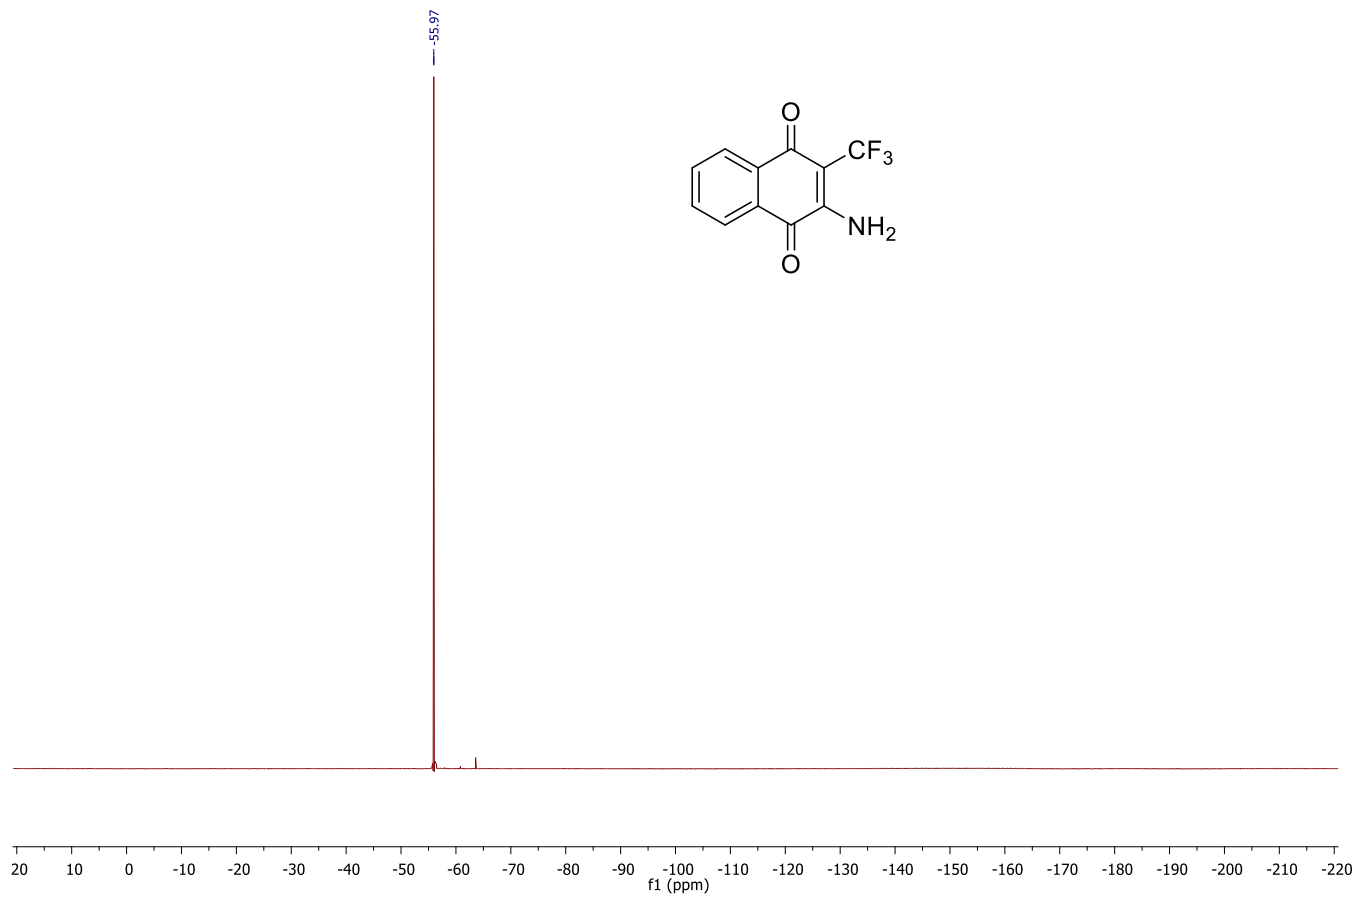

# $^{13}\text{C}$ $\{^1\text{H}\}$ NMR (101 MHz) of 4k in $\text{CDCl}_3$

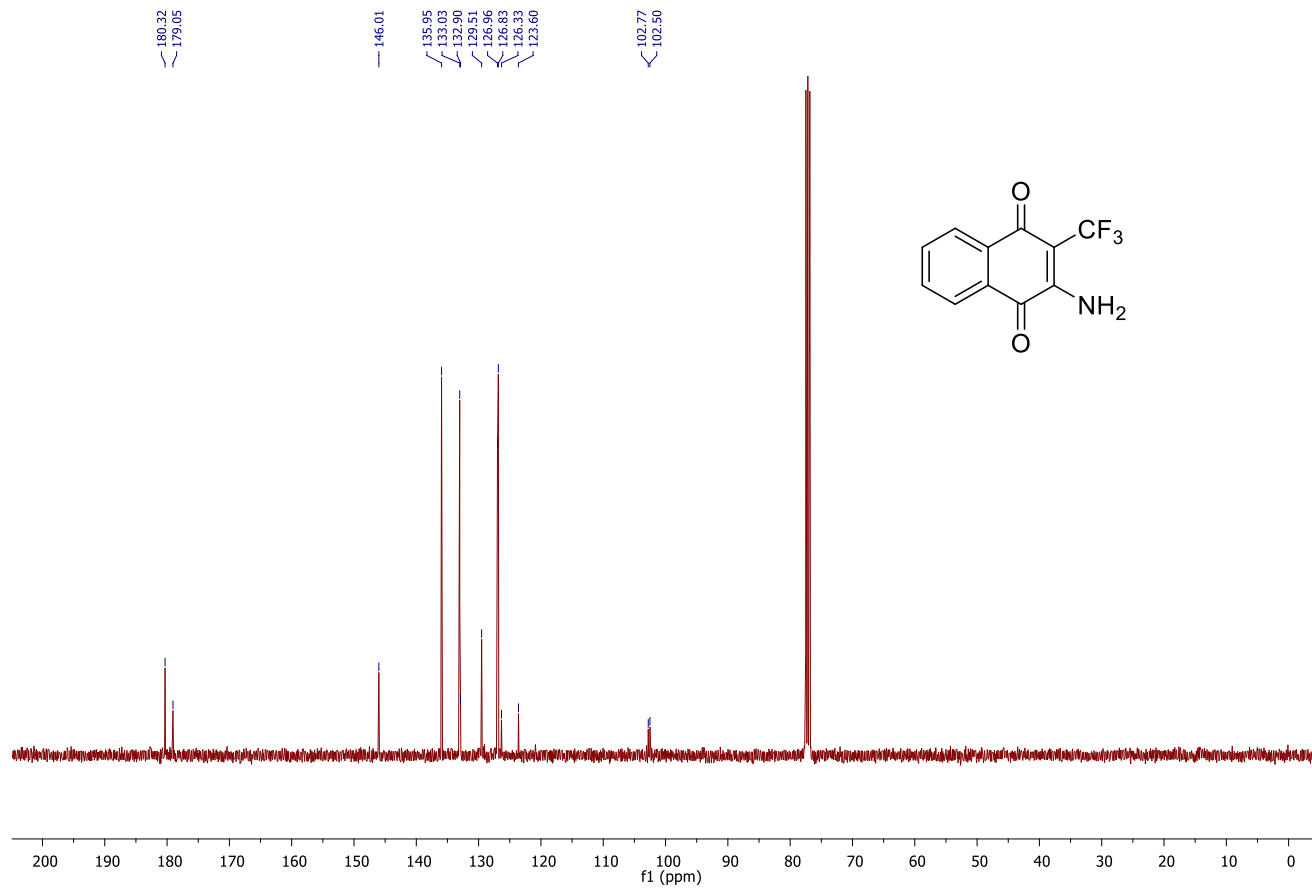

## Elemental Composition Report

### Single Mass Analysis

Tolerance = 100.0 PPM / DBE: min = -1.5, max = 50.0

Element prediction: Off

Number of isotope peaks used for i-FIT = 3

Monoisotopic Mass, Even Electron Ions

25 formula(e) evaluated with 1 results within limits (up to 3 closest results for each mass)

Elements Used:

C: 0-11 H: 0-100 N: 0-1 O: 0-2 F: 0-3

NQ-NH2-CF3

QMI DIVISION, CSIR-IIIM JAMMU  
Xevo G2-XS QTOF YFC2015

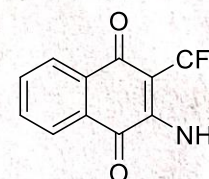

15-Mar-2023

12:34:41

1: TOF MS ES+

4.12e+006

150323\_06 7 (0.155)

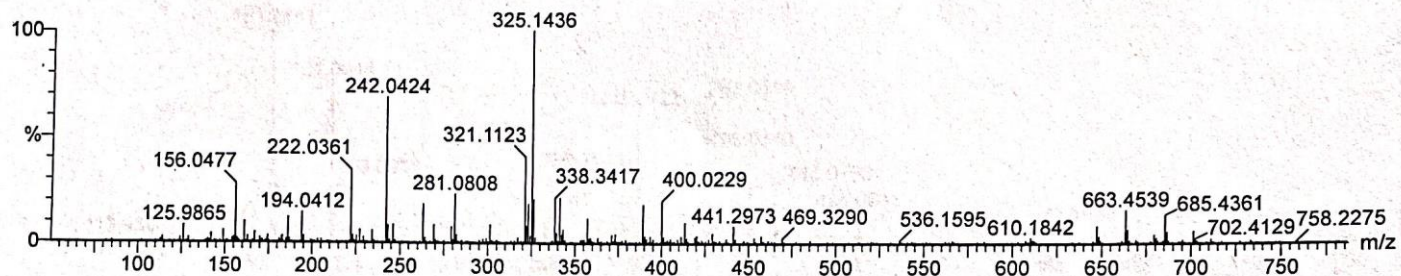

Minimum: -1.5  
Maximum: 2.0 100.0 50.0

| Mass     | Calc. Mass | mDa  | PPM  | DBE | i-FIT  | Norm | Conf(%) | Formula        |
|----------|------------|------|------|-----|--------|------|---------|----------------|
| 242.0424 | 242.0429   | -0.5 | -2.1 | 7.5 | 1391.6 | n/a  | n/a     | C11 H7 N O2 F3 |

# $^1\text{H}$ NMR (400 MHz) of 4l in $\text{CDCl}_3$

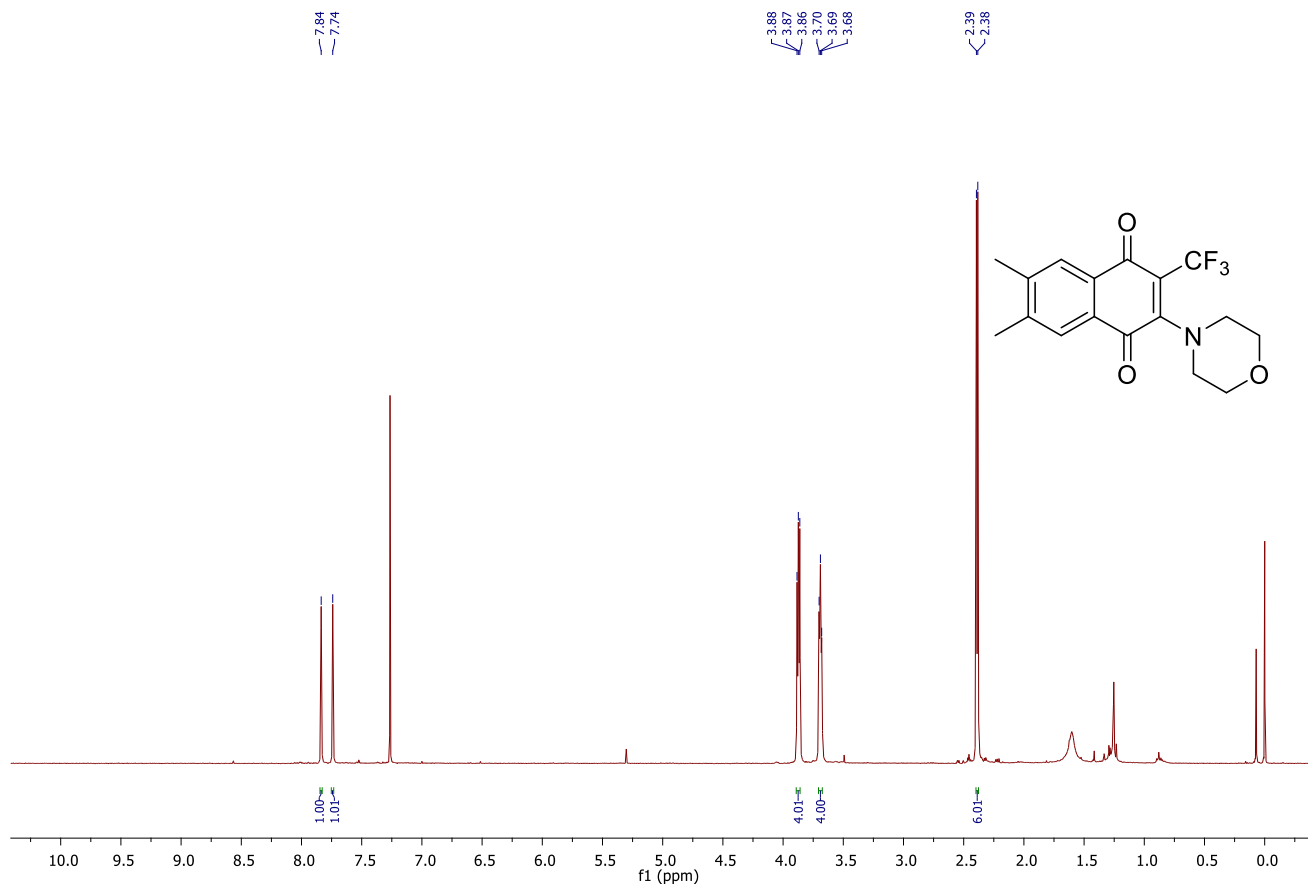



**$^{19}\text{F}$  NMR (377 MHz) of 4l in  $\text{CDCl}_3$**

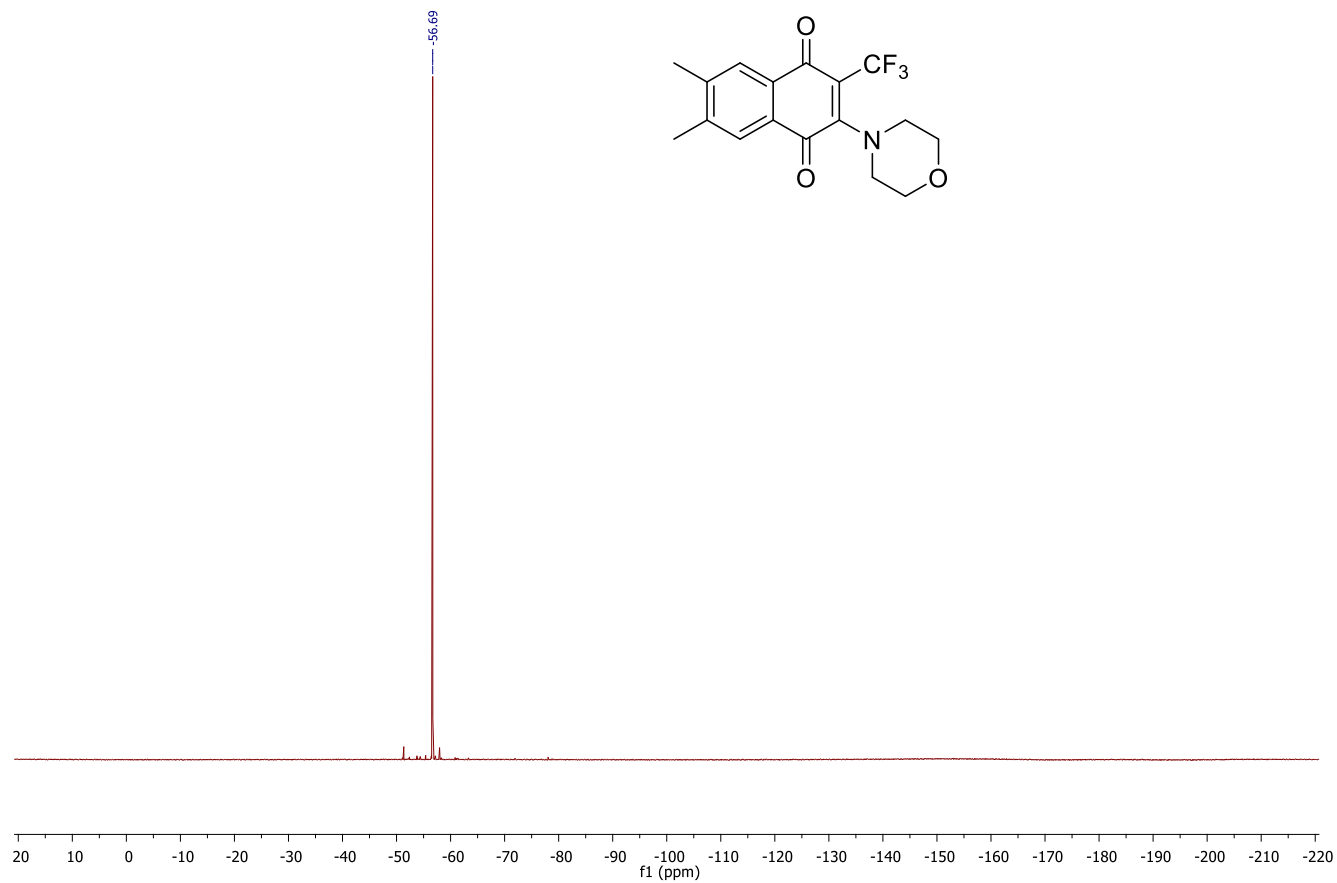

# $^{13}\text{C}$ $\{^1\text{H}\}$ NMR (101 MHz) of 4l in $\text{CDCl}_3$

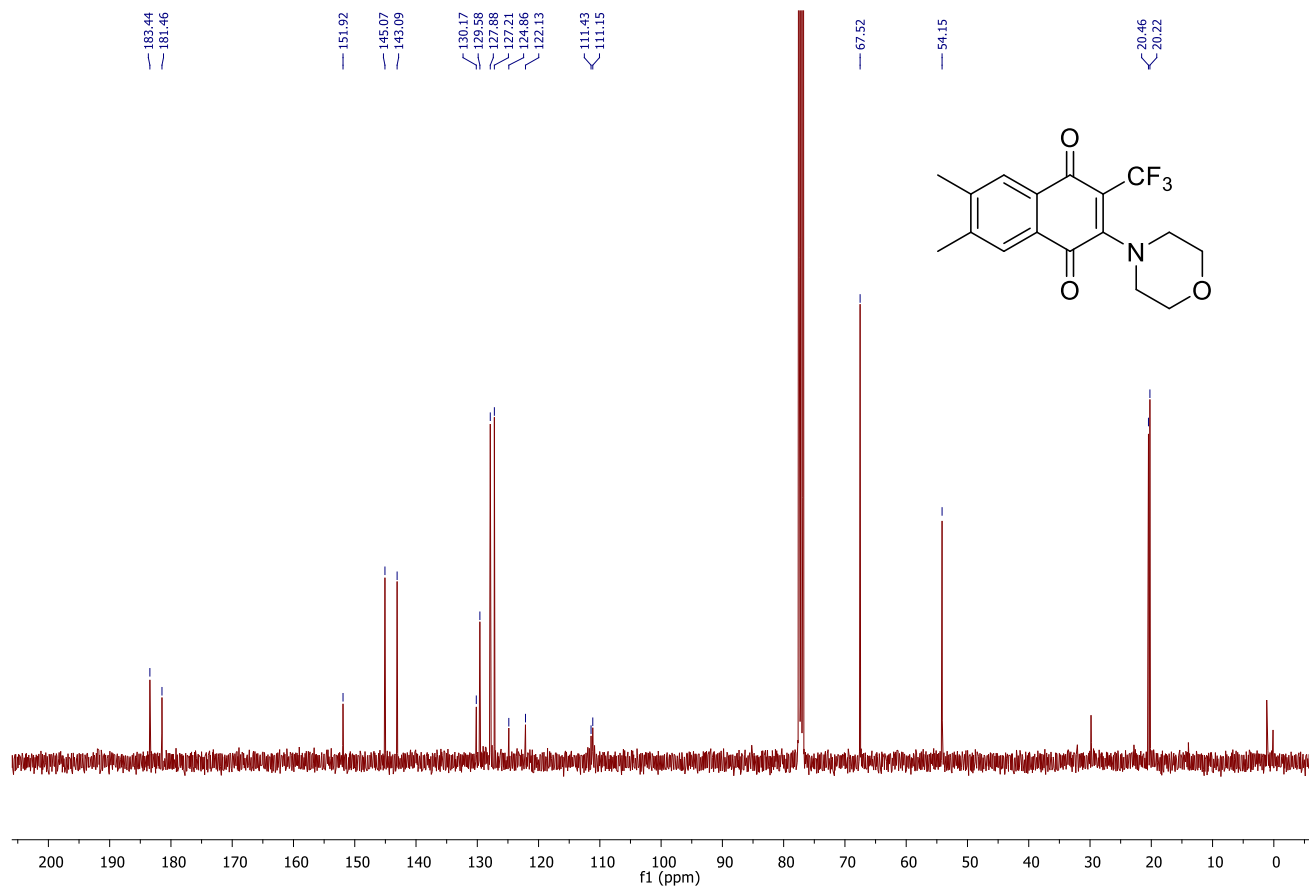

# HRMS of 4l

## Elemental Composition Report

### Single Mass Analysis

Tolerance = 100.0 PPM / DBE: min = -1.5, max = 50.0

Element prediction: Off

Number of isotope peaks used for i-FIT = 3

Monoisotopic Mass, Even Electron Ions

33 formula(e) evaluated with 1 results within limits (up to 3 closest results for each mass)

Elements Used:

C: 0-17 H: 0-100 N: 0-1 O: 0-3 F: 0-3

NQDMA-1-CF3

060423\_11 8 (0.172)

QMI DIVISION, CSIR-IIIM JAMMU  
Xevo G2-XS QTOF YFC2015

Page 1

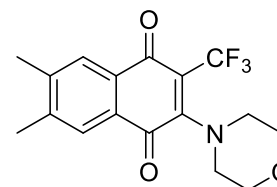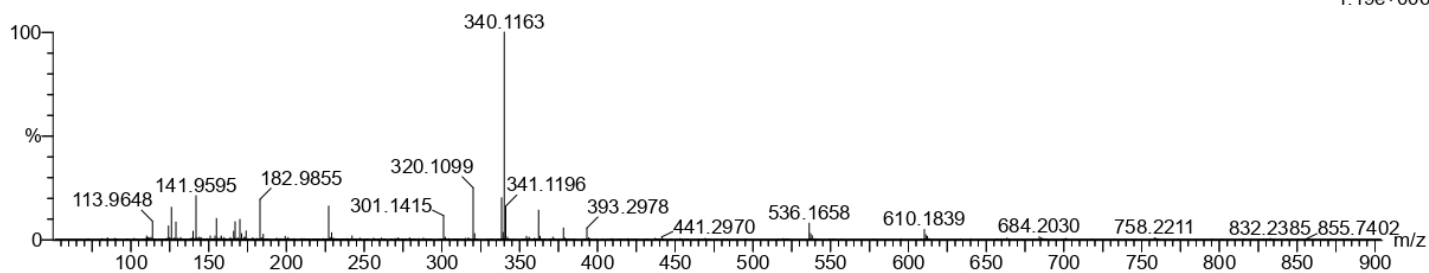

Minimum: -1.5  
Maximum: 2.0 100.0 50.0

| Mass     | Calc. Mass | mDa | PPM | DBE | i-FIT | Norm | Conf(%) | Formula         |
|----------|------------|-----|-----|-----|-------|------|---------|-----------------|
| 340.1163 | 340.1161   | 0.2 | 0.6 | 8.5 | 838.3 | n/a  | n/a     | C17 H17 N O3 F3 |

06-Apr-2023  
12:13:13  
1: TOF MS ES+  
1.19e+006

# $^1\text{H}$ NMR (400 MHz) of 4m in $\text{CDCl}_3$

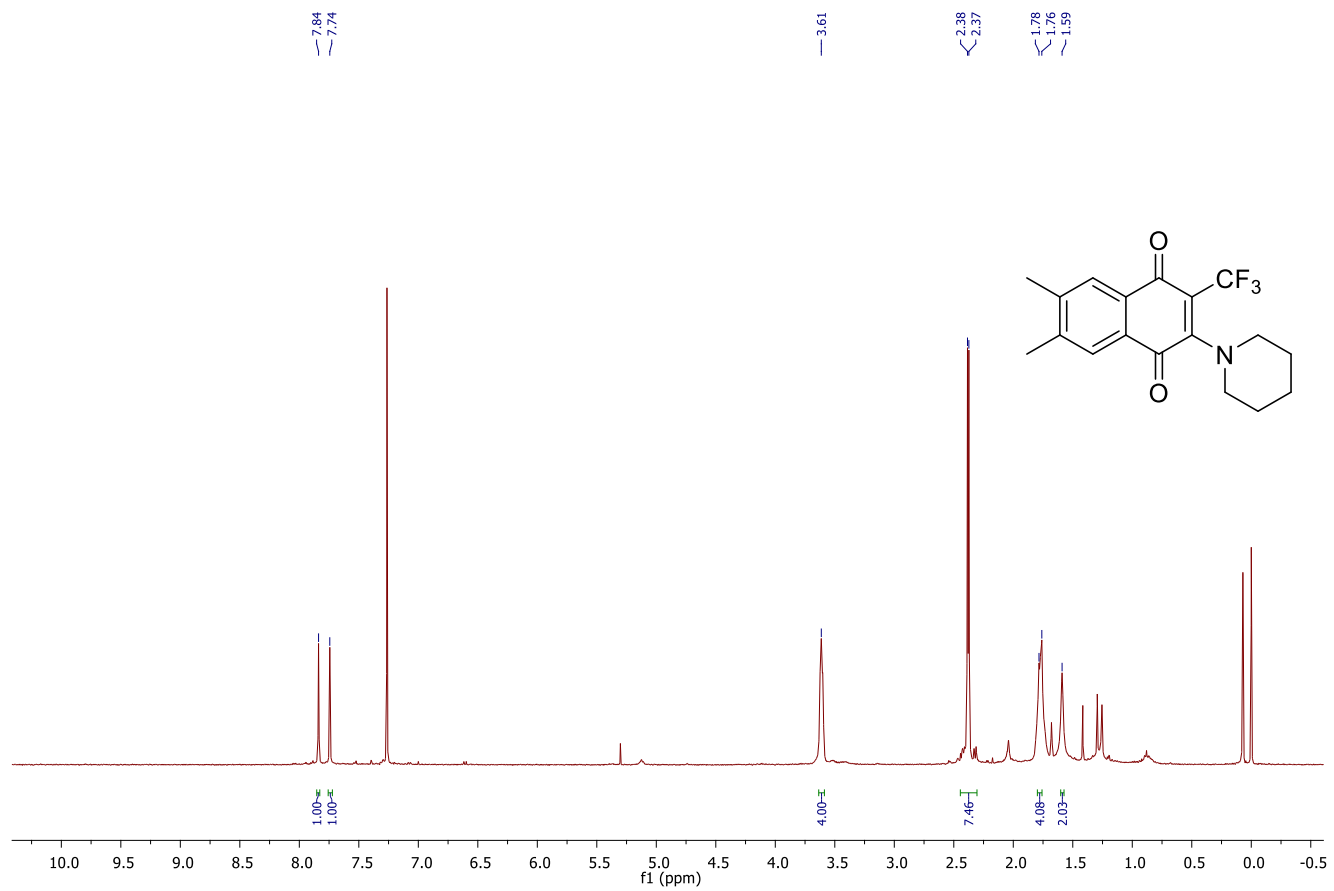

**$^{19}\text{F}$  NMR (377 MHz) of 4m in  $\text{CDCl}_3$**

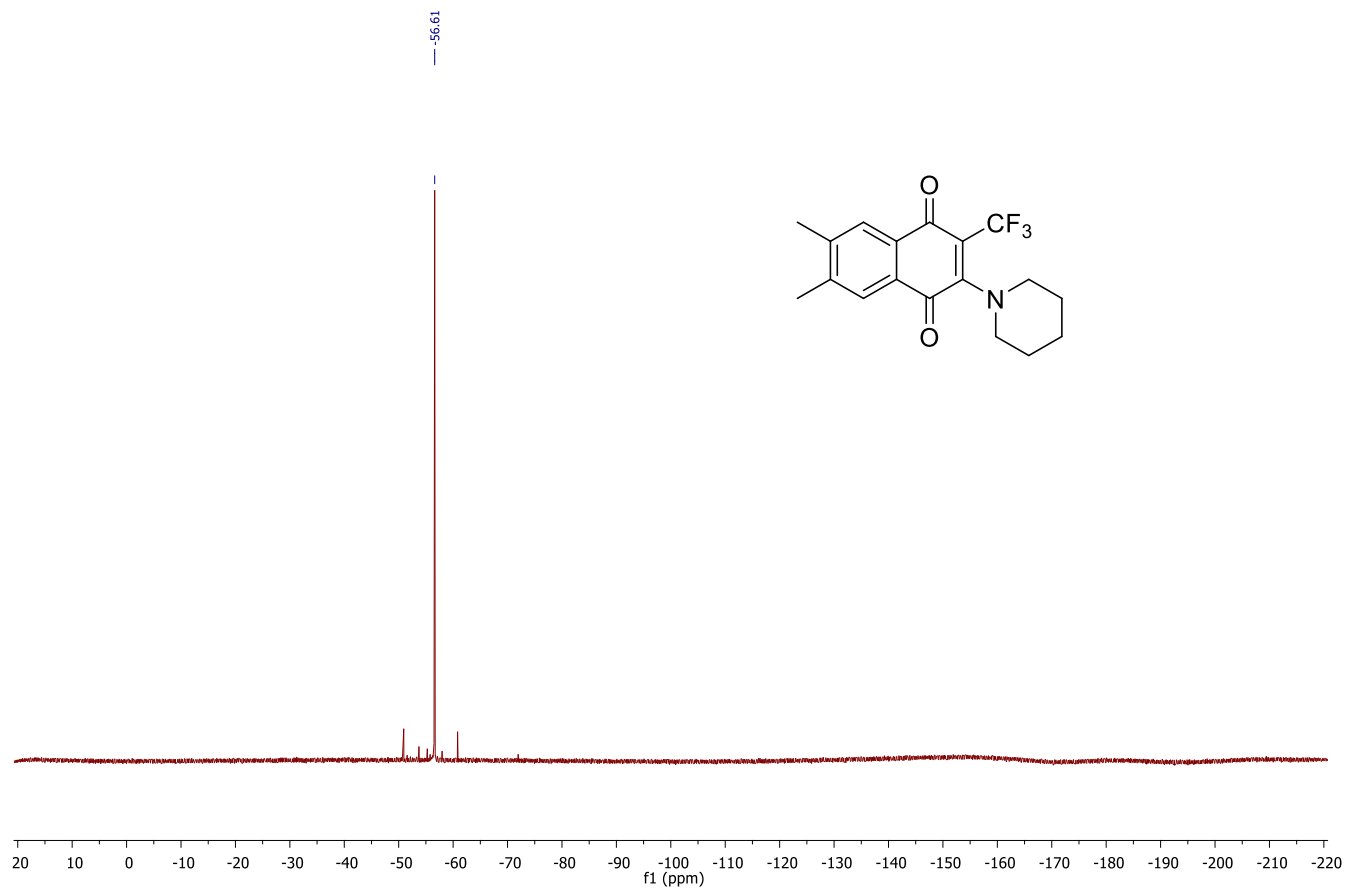

# $^{13}\text{C}$ $\{^1\text{H}\}$ NMR (101 MHz) of 4m in $\text{CDCl}_3$

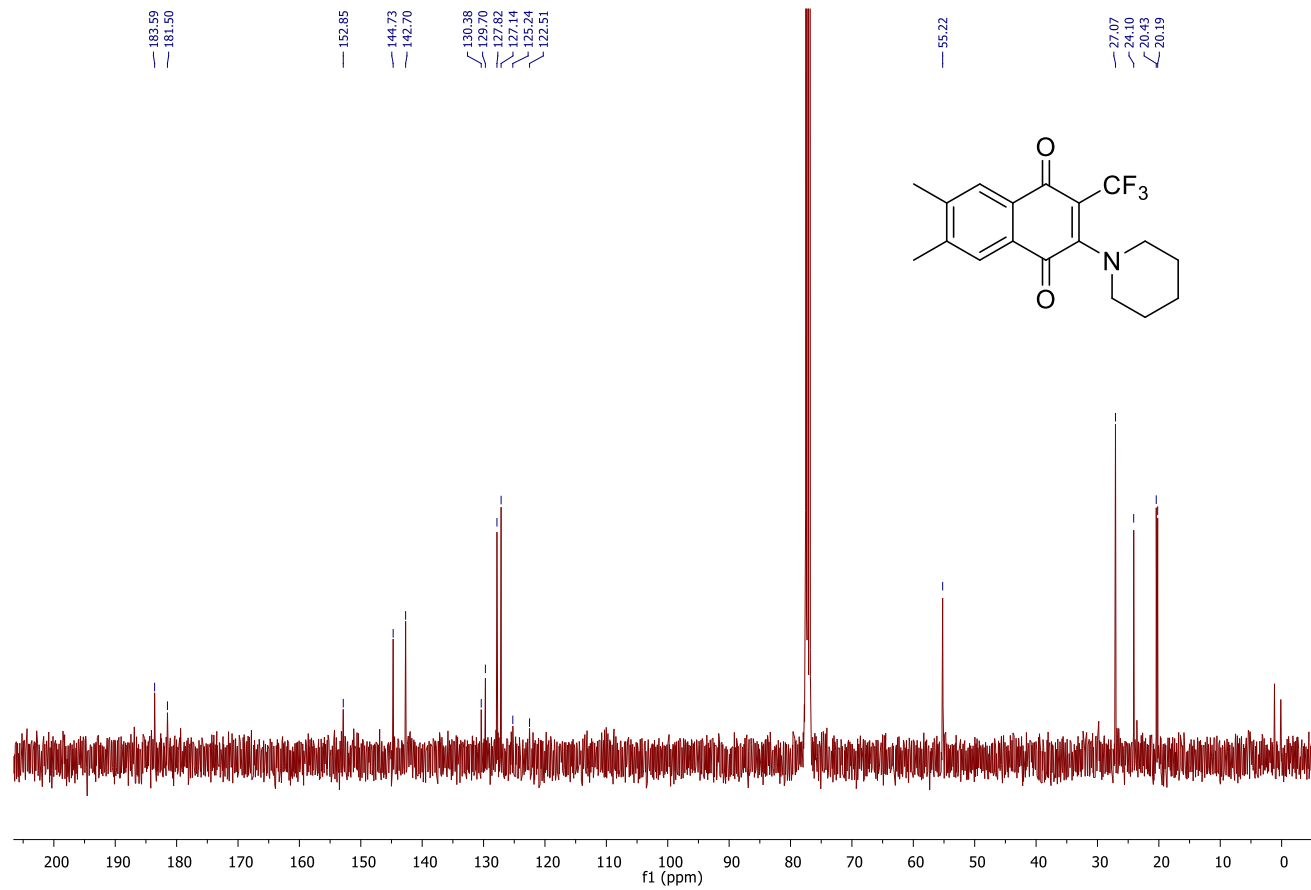

# HRMS of 4m

## Elemental Composition Report

Page 1

### Single Mass Analysis

Tolerance = 50.0 PPM / DBE: min = -1.5, max = 50.0

Element prediction: Off

Number of isotope peaks used for i-FIT = 3

Monoisotopic Mass, Even Electron Ions

25 formula(e) evaluated with 1 results within limits (up to 3 closest results for each mass)

Elements Used:

C: 0-18 H: 0-100 N: 0-1 O: 0-2 F: 0-3

DM-NQ-1

QMI DIVISION, CSIR-IIIM JAMMU  
Xevo G2-XS QTOF YFC2015

11-Jul-2023  
12:01:34  
1: TOF MS ES+  
1.39e+007

110723\_03 9 (0.208)

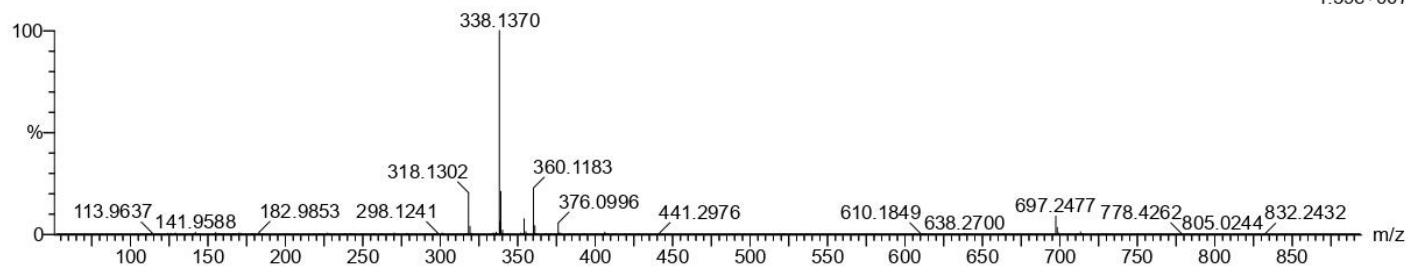

Minimum: -1.5  
Maximum: 2.0 50.0 50.0

| Mass     | Calc. Mass | mDa | PPM | DBE | i-FIT | Norm | Conf (%) | Formula         |
|----------|------------|-----|-----|-----|-------|------|----------|-----------------|
| 338.1370 | 338.1368   | 0.2 | 0.6 | 8.5 | 938.0 | n/a  | n/a      | C18 H19 N O2 F3 |

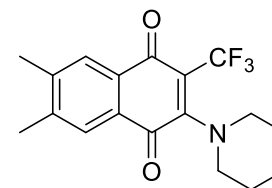

# $^1\text{H}$ NMR (400 MHz) of 4n in $\text{CDCl}_3$

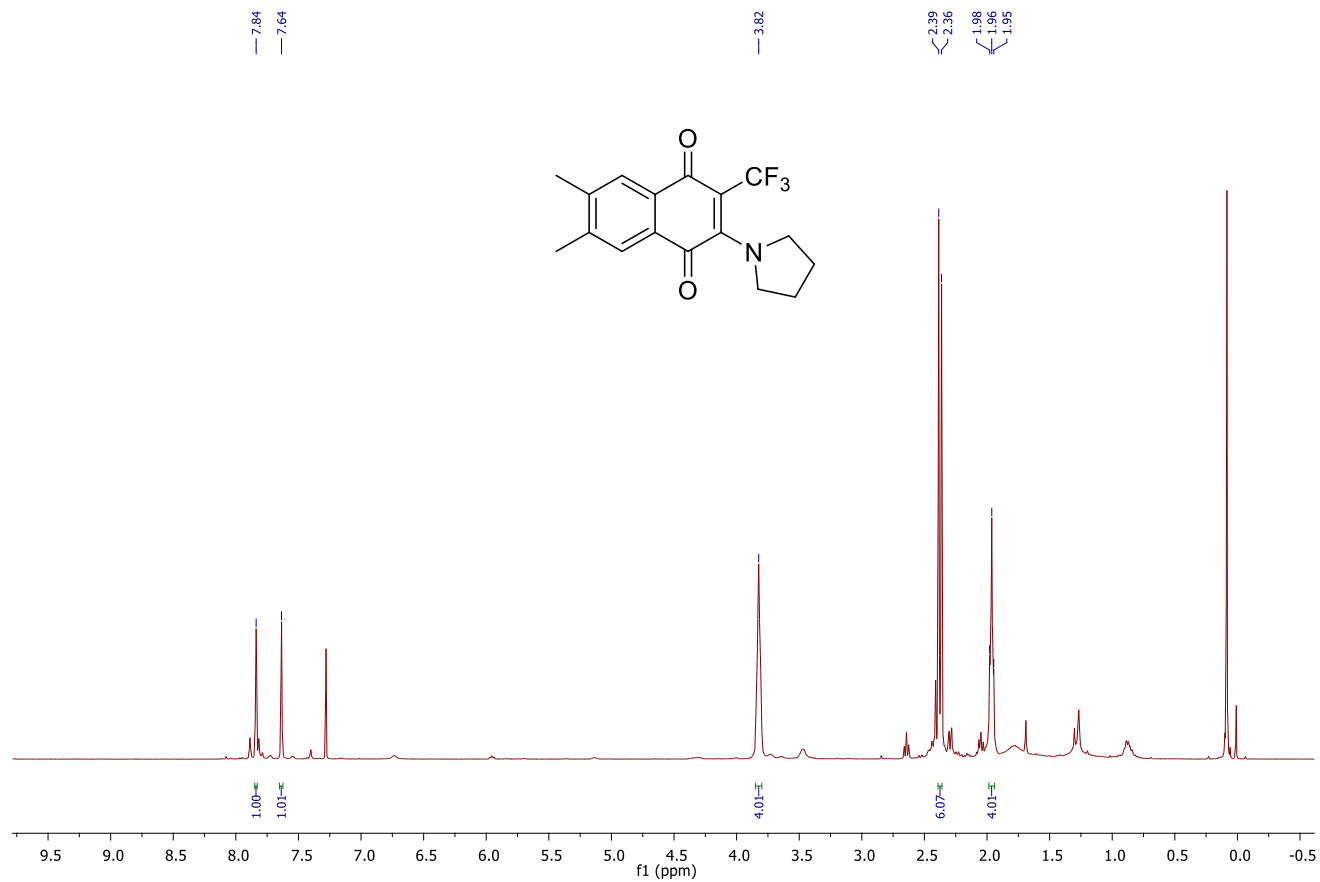



**$^{19}\text{F}$  NMR (377 MHz) of 4n in  $\text{CDCl}_3$**

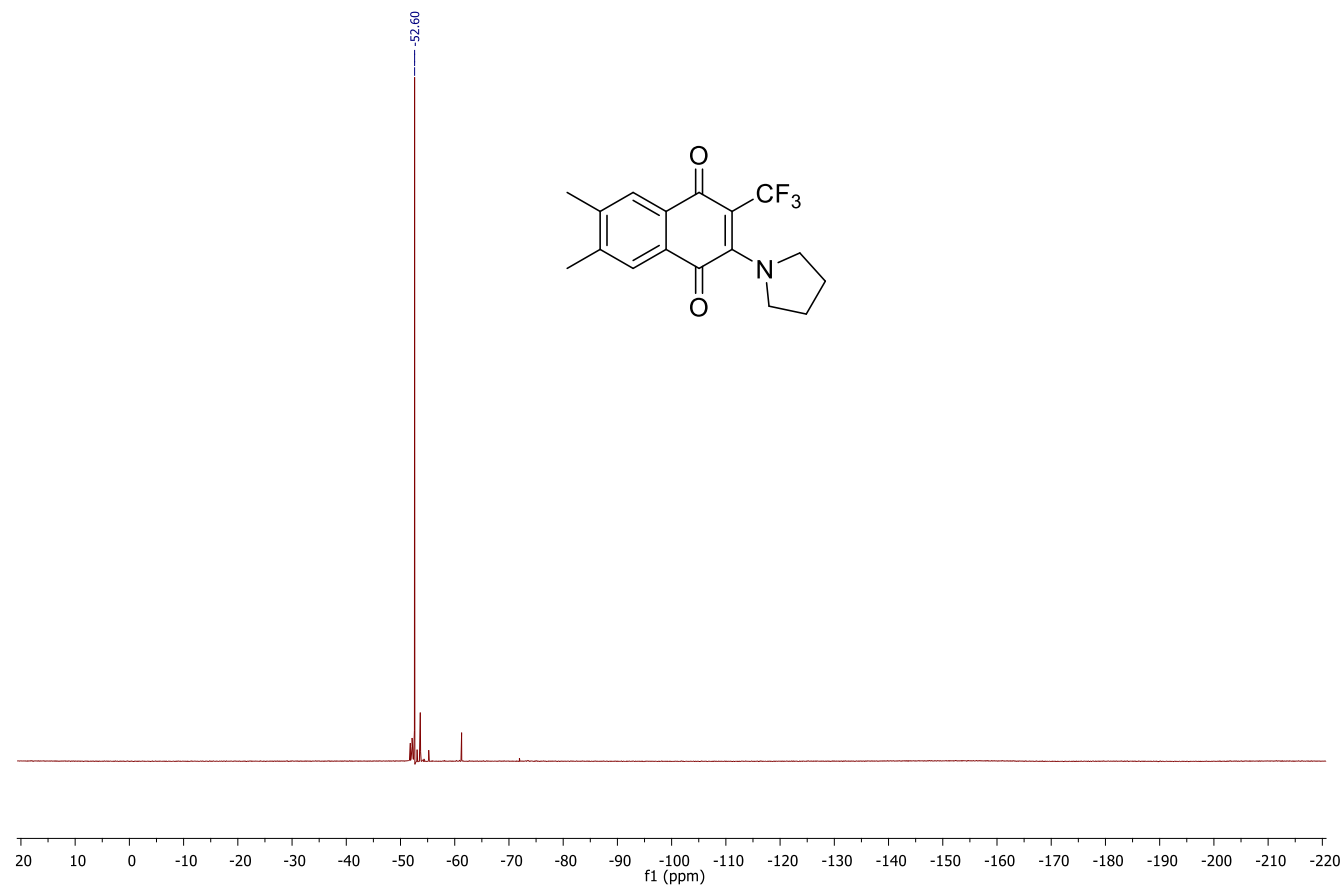

# $^{13}\text{C}$ $\{^1\text{H}\}$ NMR (101 MHz) of 4n in $\text{CDCl}_3$

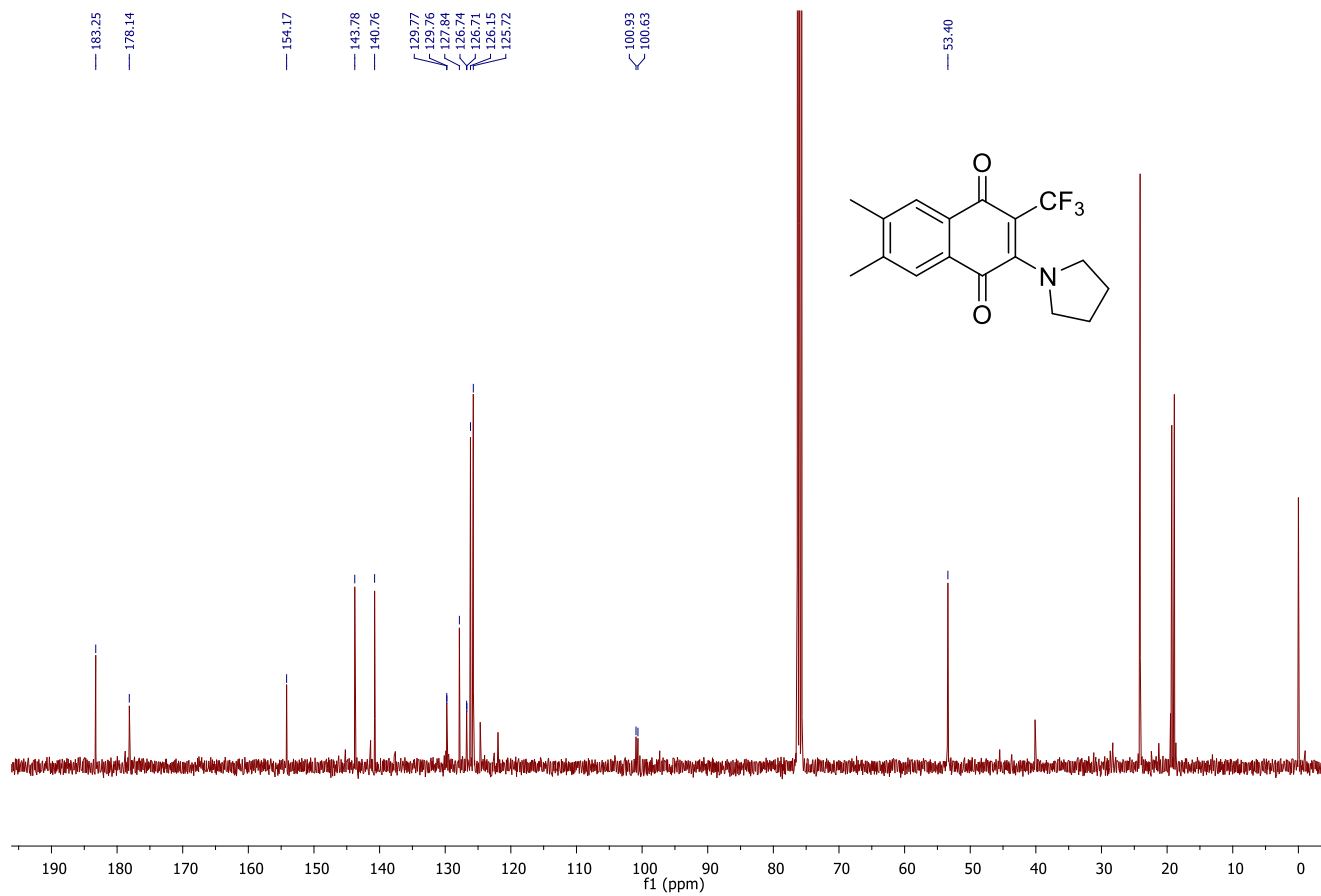

# HRMS of 4n

## Elemental Composition Report

Page 1

### Single Mass Analysis

Tolerance = 50.0 PPM / DBE: min = -1.5, max = 50.0

Element prediction: Off

Number of isotope peaks used for i-FIT = 3

Monoisotopic Mass, Even Electron Ions

25 formula(e) evaluated with 1 results within limits (up to 3 closest results for each mass)

Elements Used:

C: 0-17 H: 0-100 N: 0-1 O: 0-2 F: 0-3

DM-NQ-2

QMI DIVISION, CSIR-IIIM JAMMU  
Xevo G2-XS QTOF YFC2015

10-Jul-2023  
12:58:16  
1: TOF MS ES+  
1.18e+006

100723\_14 4 (0.104)

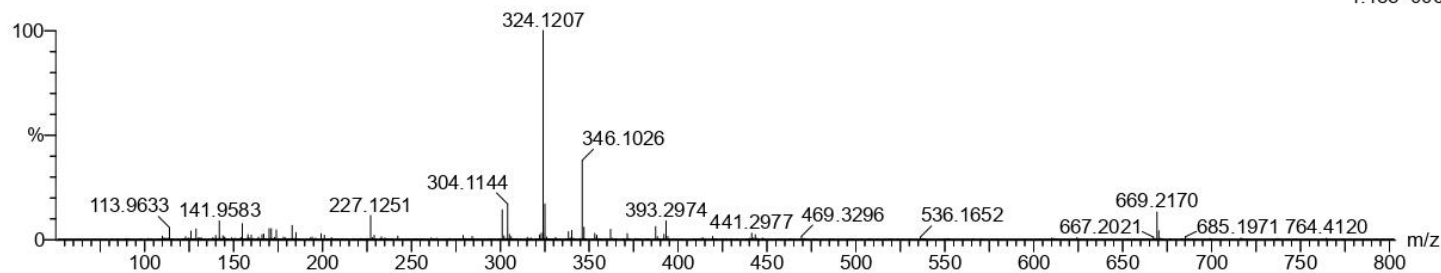

Minimum: -1.5  
Maximum: 2.0 50.0 50.0

| Mass     | Calc. Mass | mDa  | PPM  | DBE | i-FIT | Norm | Conf(%) | Formula         |
|----------|------------|------|------|-----|-------|------|---------|-----------------|
| 324.1207 | 324.1211   | -0.4 | -1.2 | 8.5 | 927.8 | n/a  | n/a     | C17 H17 N O2 F3 |

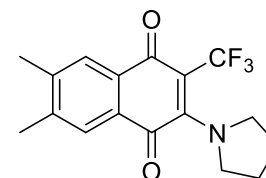

# $^1\text{H}$ NMR (400 MHz) of 5a in $\text{CDCl}_3$

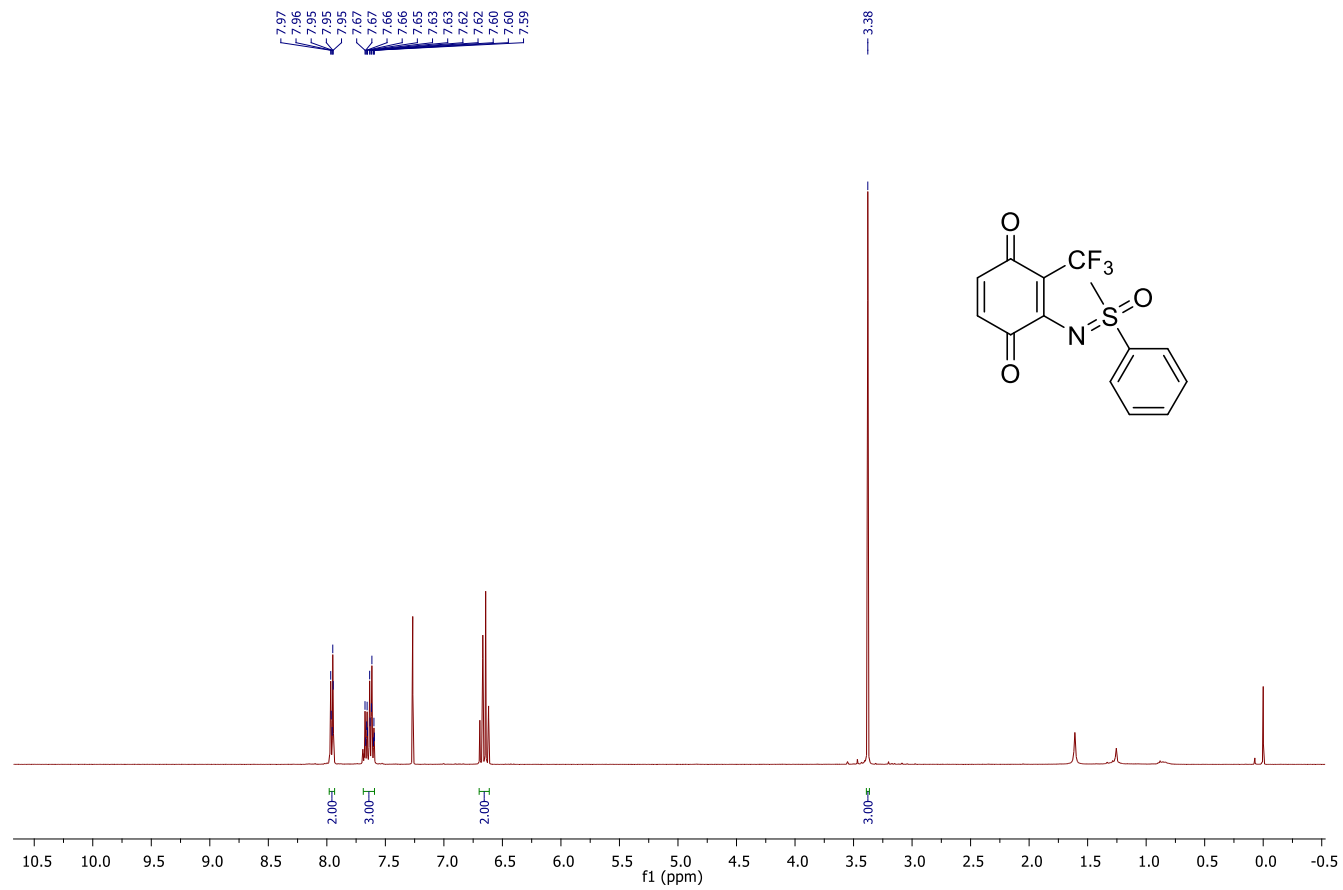

**$^{19}\text{F}$  NMR (377 MHz) of 5a in  $\text{CDCl}_3$**

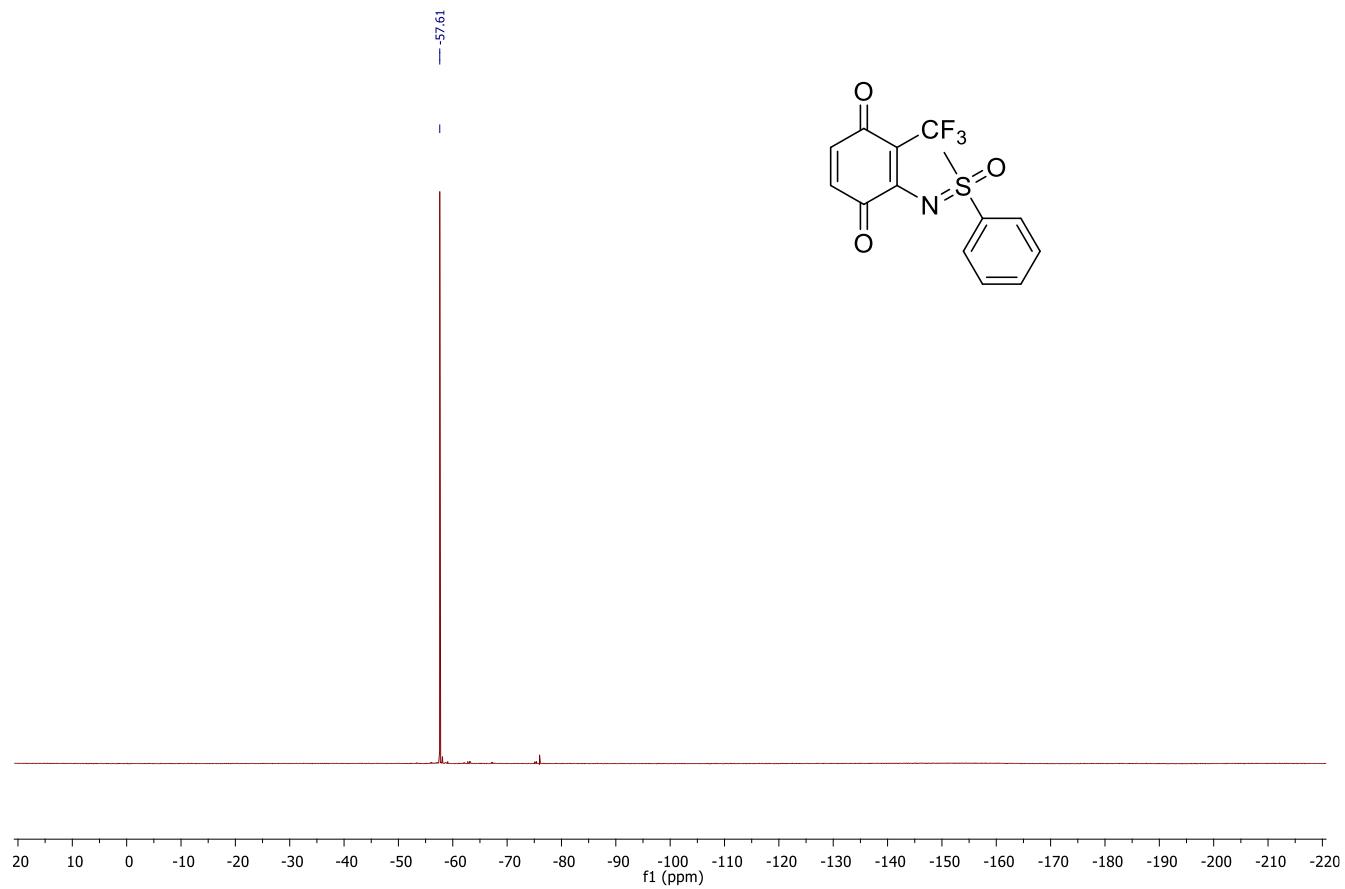

**$^{13}\text{C}$   $\{^1\text{H}\}$  NMR (101 MHz) of 5a in  $\text{CDCl}_3$**

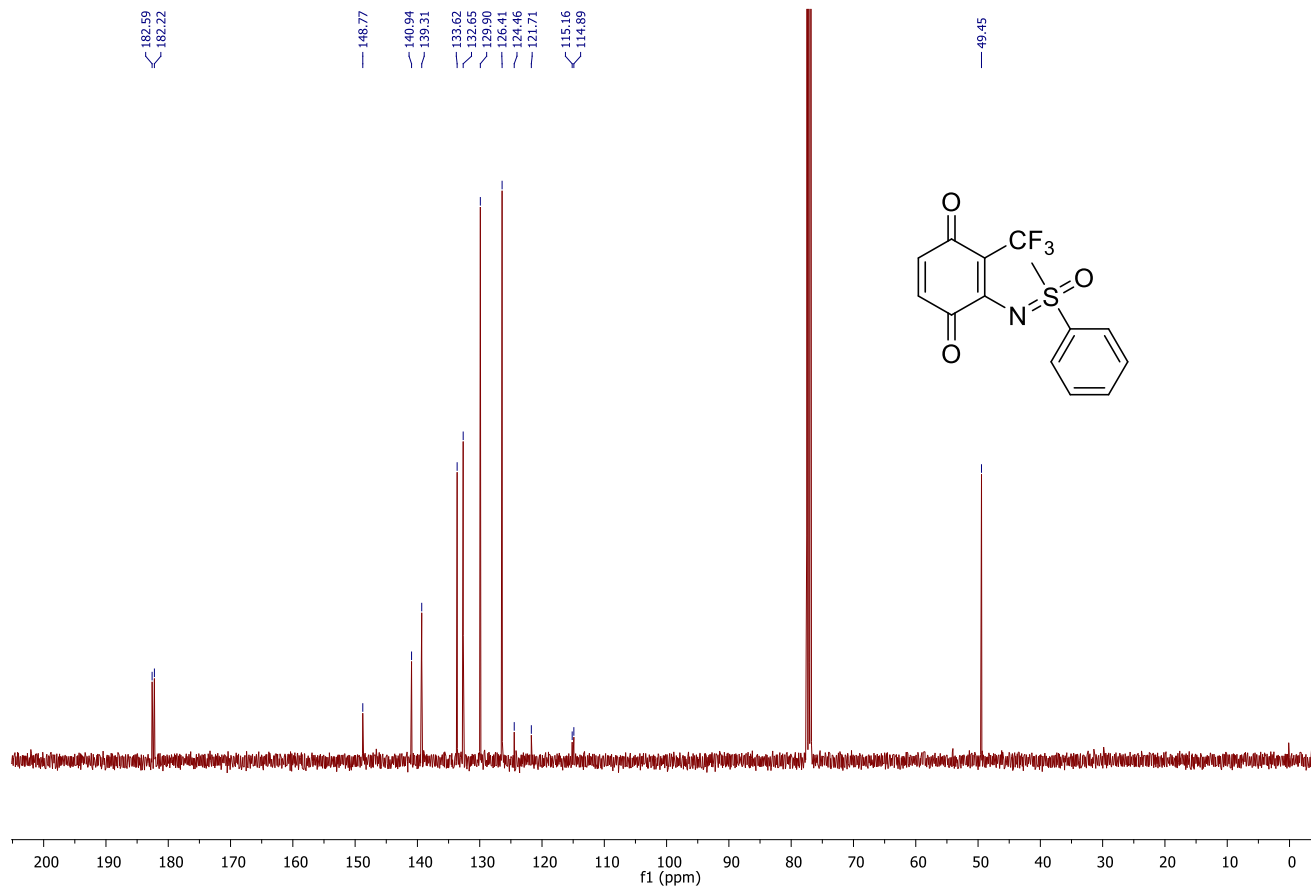

# HRMS of 5a

## Elemental Composition Report

Page 1

### Single Mass Analysis

Tolerance = 100.0 PPM / DBE: min = -1.5, max = 50.0

Element prediction: Off

Number of isotope peaks used for i-FIT = 3

Monoisotopic Mass, Even Electron Ions

65 formula(e) evaluated with 1 results within limits (up to 3 closest results for each mass)

Elements Used:

C: 0-14 H: 0-100 N: 0-1 O: 0-3 F: 0-3 S: 0-1

BQS-1-CF3

QMI DIVISION, CSIR-IIIM JAMMU  
Xevo G2-XS QTOF YFC2015

28-Mar-2023

12:29:40

1: TOF MS ES+  
5.49e+006

280323\_09 7 (0.155)

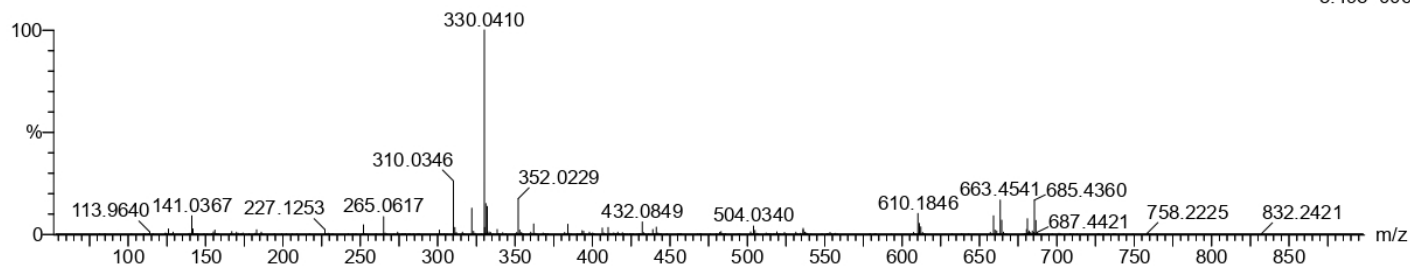

Minimum: -1.5  
Maximum: 2.0 100.0 50.0

| Mass     | Calc. Mass | mDa  | PPM  | DBE | i-FIT | Norm | Conf (%) | Formula           |
|----------|------------|------|------|-----|-------|------|----------|-------------------|
| 330.0410 | 330.0412   | -0.2 | -0.6 | 8.5 | 807.8 | n/a  | n/a      | C14 H11 N O3 F3 S |

# $^1\text{H}$ NMR (400 MHz) of 5b in $\text{CDCl}_3$

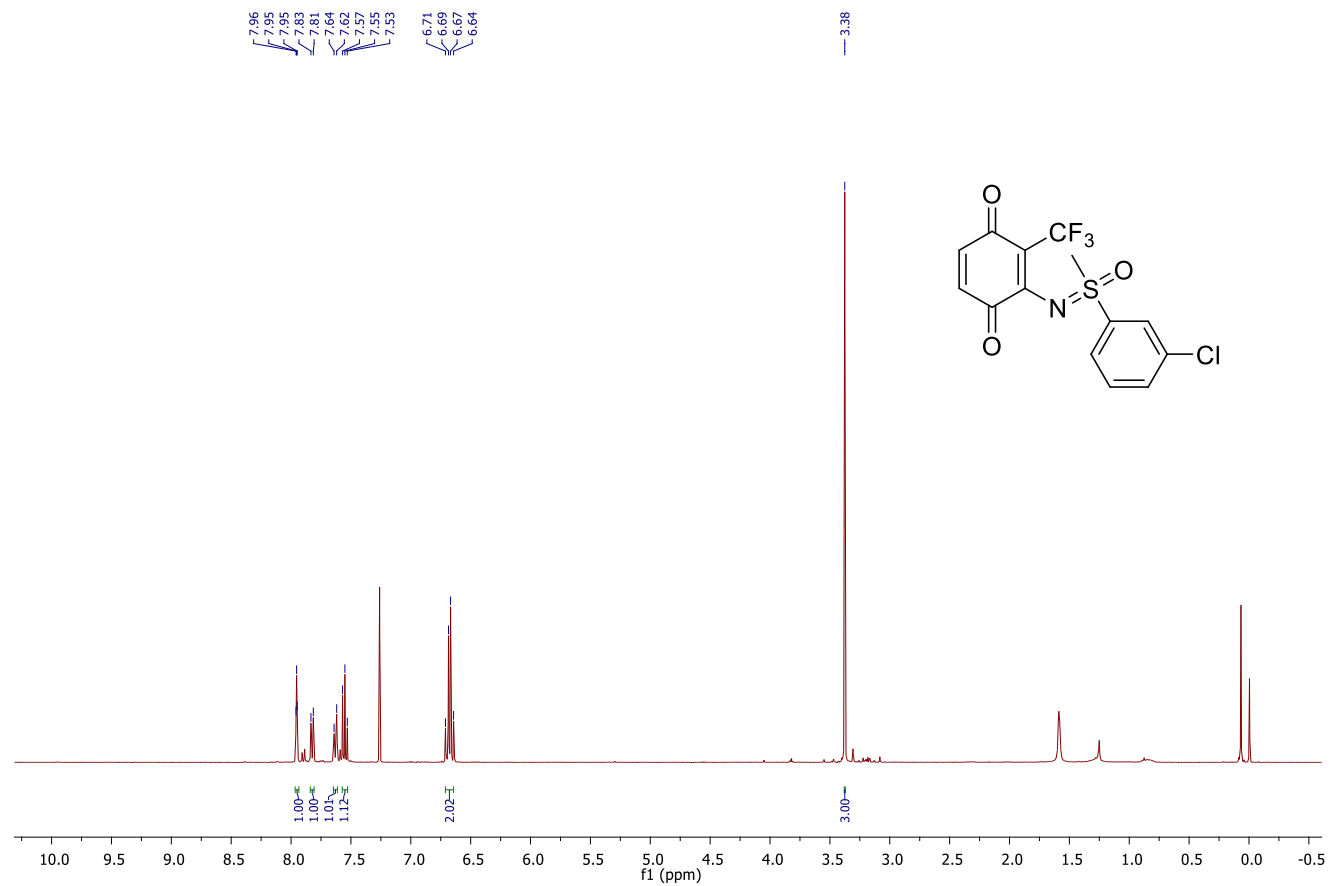



# $^{13}\text{C}$ $\{^1\text{H}\}$ NMR (101 MHz) of 5b in $\text{CDCl}_3$

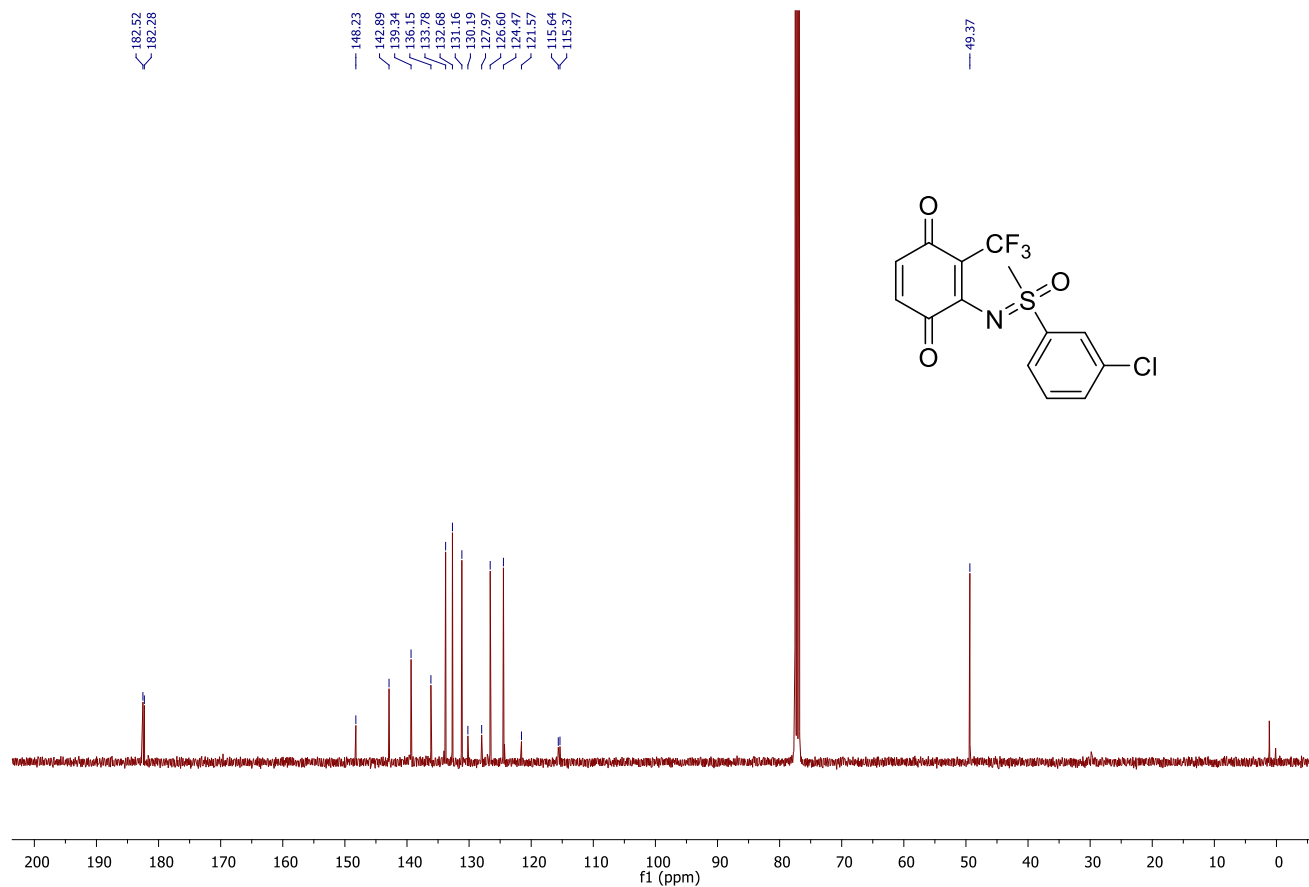

# HRMS of 5b

## Elemental Composition Report

Page 1

### Single Mass Analysis

Tolerance = 100.0 PPM / DBE: min = -1.5, max = 50.0

Element prediction: Off

Number of isotope peaks used for i-FIT = 3

Monoisotopic Mass, Even Electron Ions

129 formula(e) evaluated with 1 results within limits (up to 3 closest results for each mass)

Elements Used:

C: 0-14 H: 0-100 N: 0-1 O: 0-3 F: 0-3 S: 0-1 Cl: 0-1

BQS-3-CF3

QMI DIVISION, CSIR-IIIM JAMMU  
Xevo G2-XS QTOF YFC2015

280323\_11 6 (0.138)

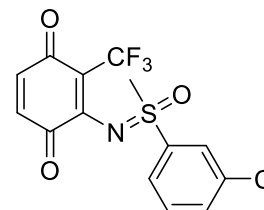

28-Mar-2023  
12:34:48  
1: TOF MS ES+  
4.50e+006

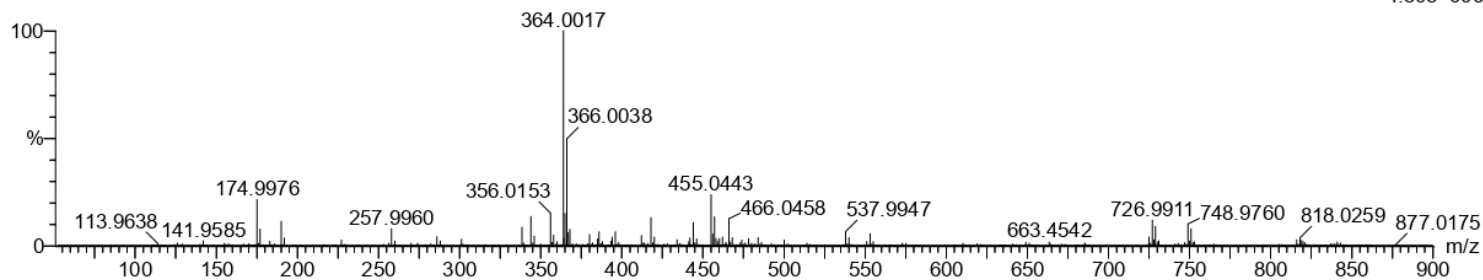

Minimum: -1.5  
Maximum: 2.0 100.0 50.0

| Mass     | Calc. Mass | mDa  | PPM  | DBE | i-FIT | Norm | Conf (%) | Formula              |
|----------|------------|------|------|-----|-------|------|----------|----------------------|
| 364.0017 | 364.0022   | -0.5 | -1.4 | 8.5 | 916.9 | n/a  | n/a      | C14 H10 N O3 F3 S Cl |

# $^1\text{H}$ NMR (400 MHz) of 5c in $\text{CDCl}_3$

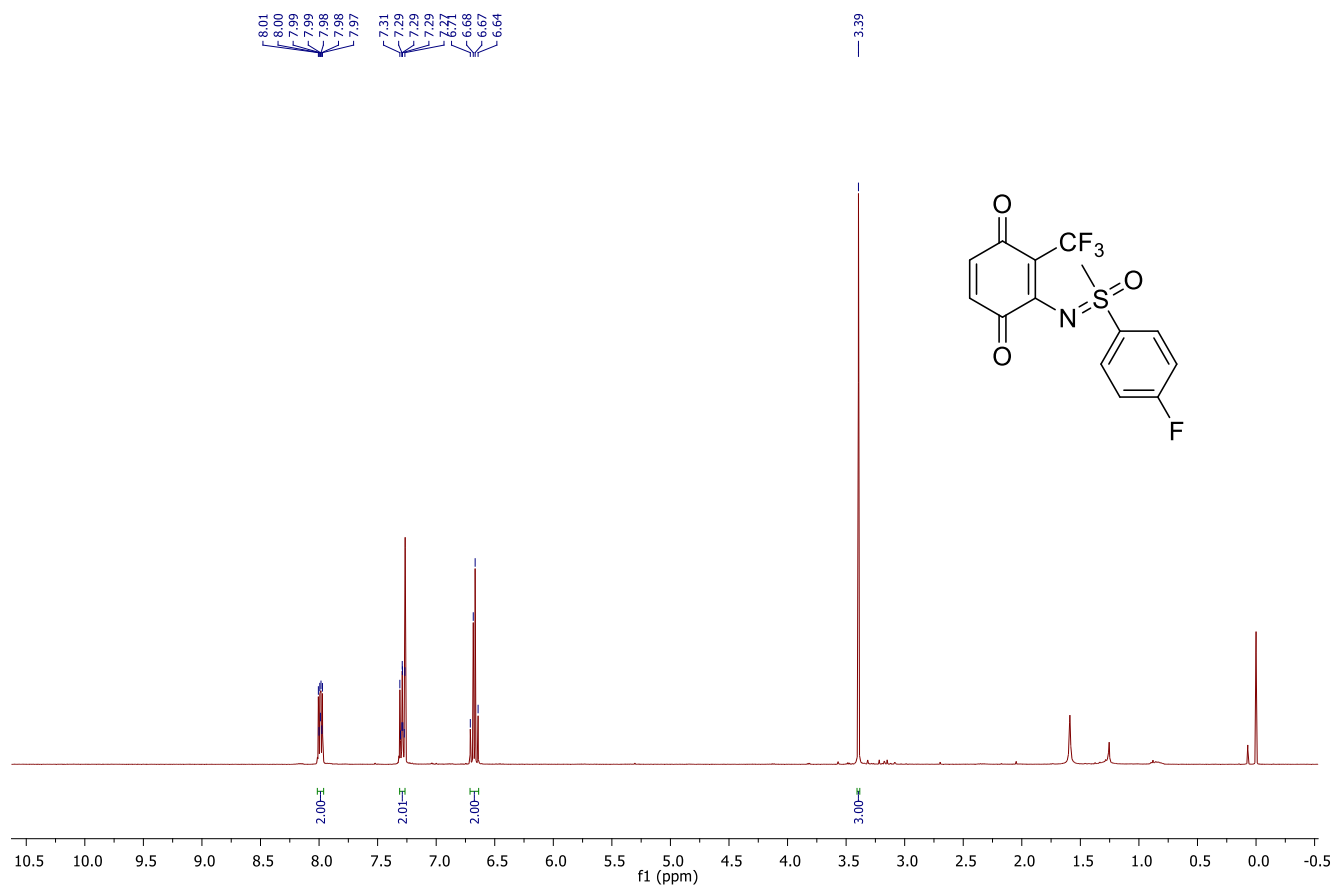

# $^{19}\text{F}$ NMR (377 MHz) of 5c in $\text{CDCl}_3$

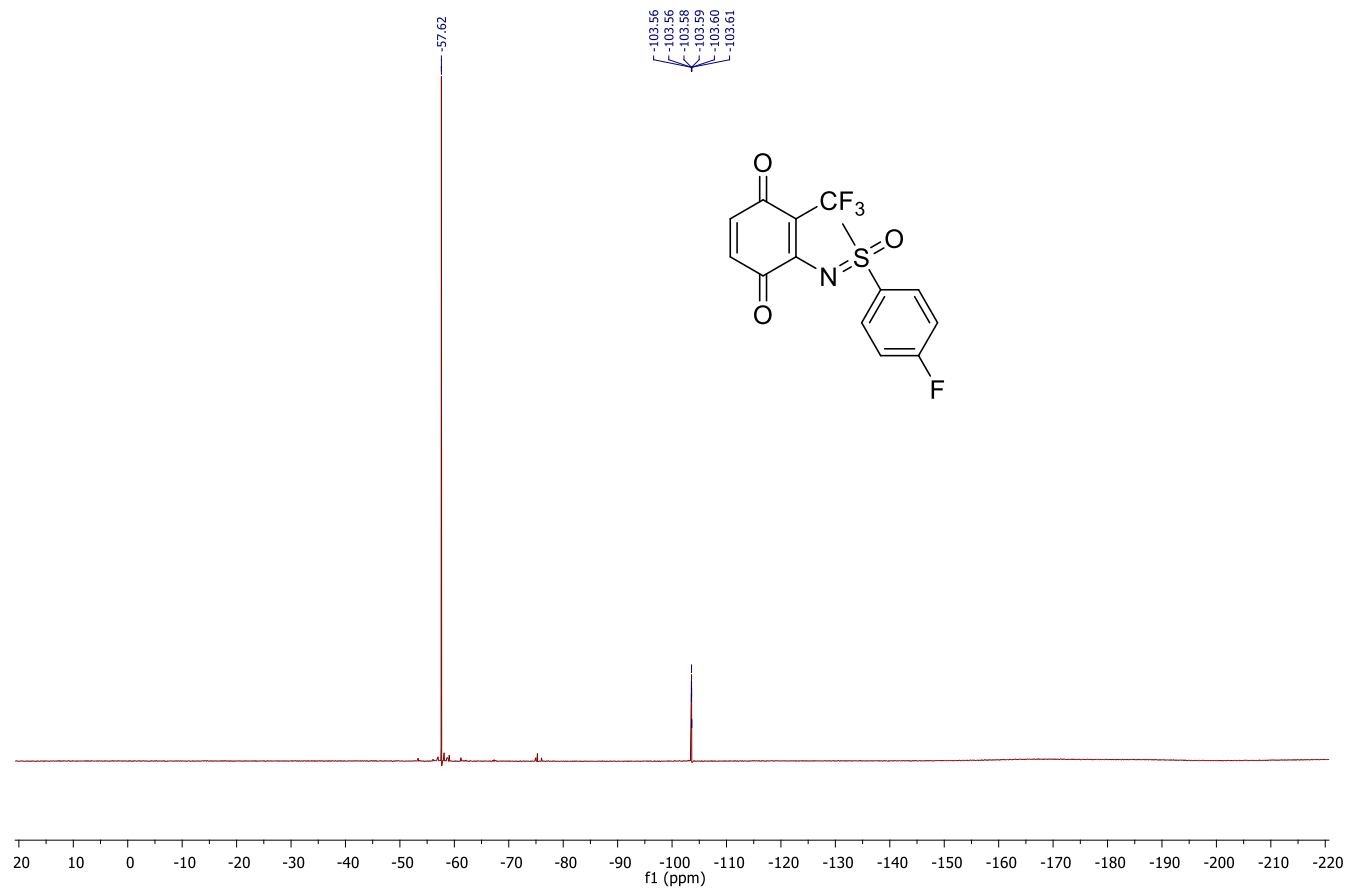

# $^{13}\text{C}$ $\{^1\text{H}\}$ NMR (101 MHz) of 5c in $\text{CDCl}_3$

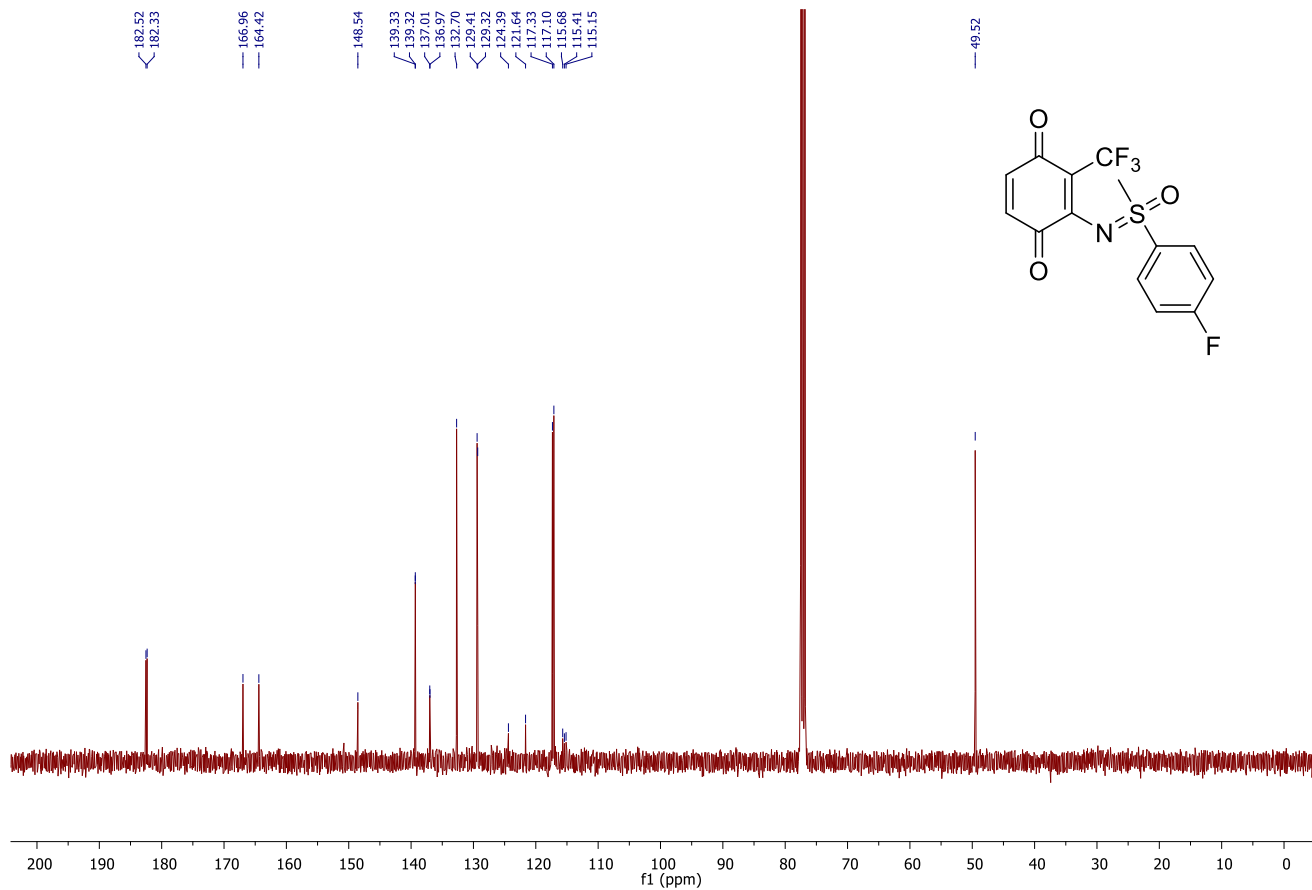

# HRMS of 5b

## Elemental Composition Report

Page 1

### Single Mass Analysis

Tolerance = 100.0 PPM / DBE: min = -1.5, max = 50.0

Element prediction: Off

Number of isotope peaks used for i-FIT = 3

Monoisotopic Mass, Even Electron Ions

81 formula(e) evaluated with 1 results within limits (up to 3 closest results for each mass)

Elements Used:

C: 0-14 H: 0-100 N: 0-1 O: 0-3 F: 0-4 S: 0-1

BQS-4-CF3

QMI DIVISION, CSIR-IIIM JAMMU  
Xevo G2-XS QTOF YFC2015

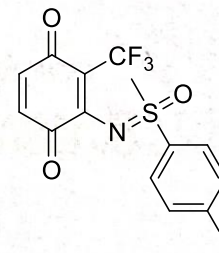

15-Mar-2023  
13:50:09  
1: TOF MS ES+  
7.90e+006

150323\_35 6 (0.138)

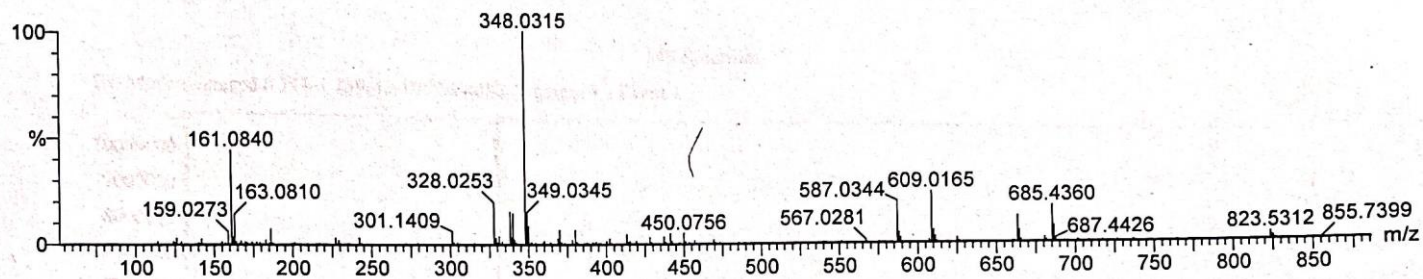

Minimum: -1.5  
Maximum: 2.0 100.0 50.0

| Mass     | Calc. Mass | mDa  | PPM  | DBE | i-FIT  | Norm | Conf (%) | Formula           |
|----------|------------|------|------|-----|--------|------|----------|-------------------|
| 348.0315 | 348.0318   | -0.3 | -0.9 | 8.5 | 1058.5 | n/a  | n/a      | C14 H10 N O3 F4 S |

# $^1\text{H}$ NMR (400 MHz) of 5d in $\text{CDCl}_3$

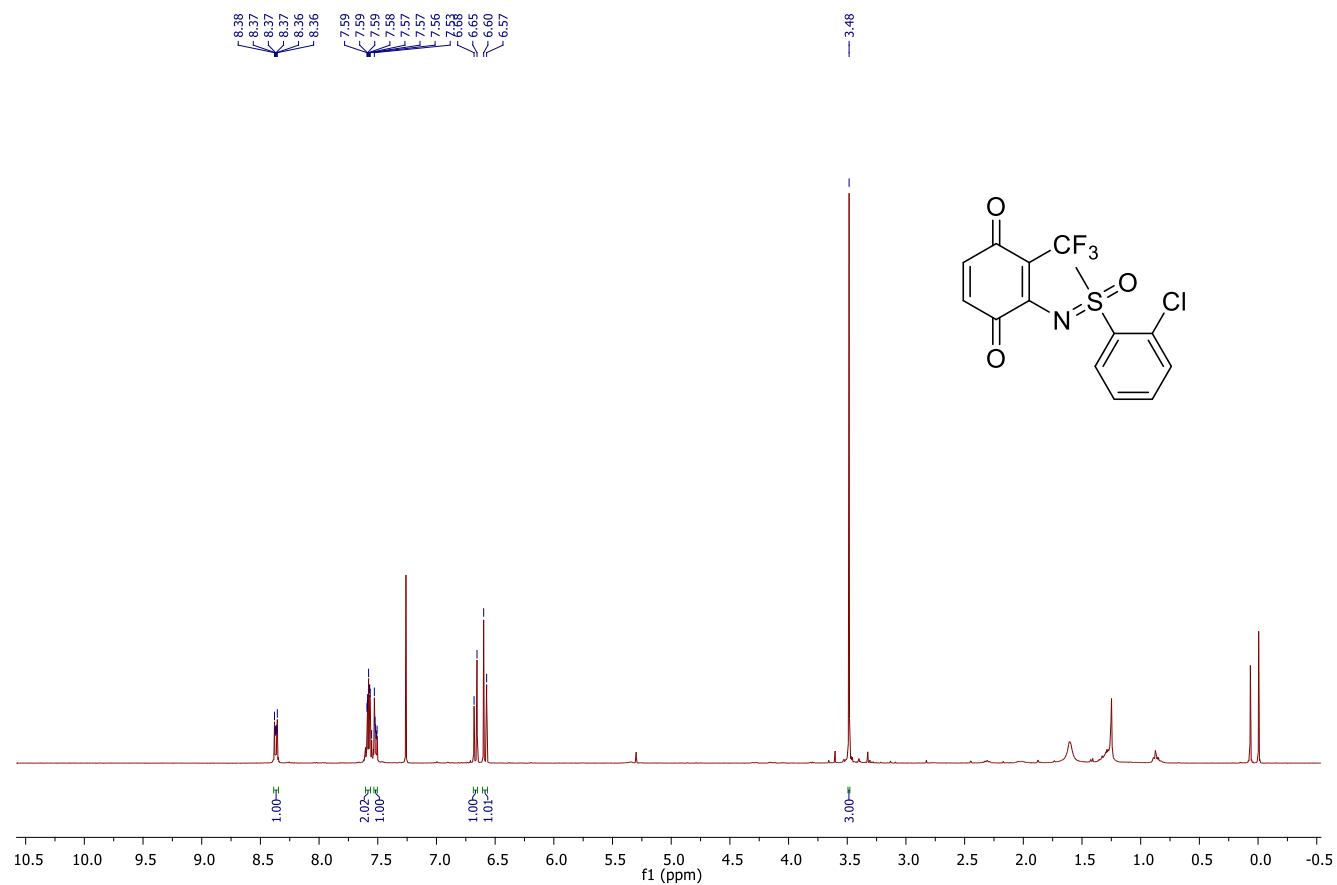

**$^{19}\text{F}$  NMR (377 MHz) of 5d in  $\text{CDCl}_3$**

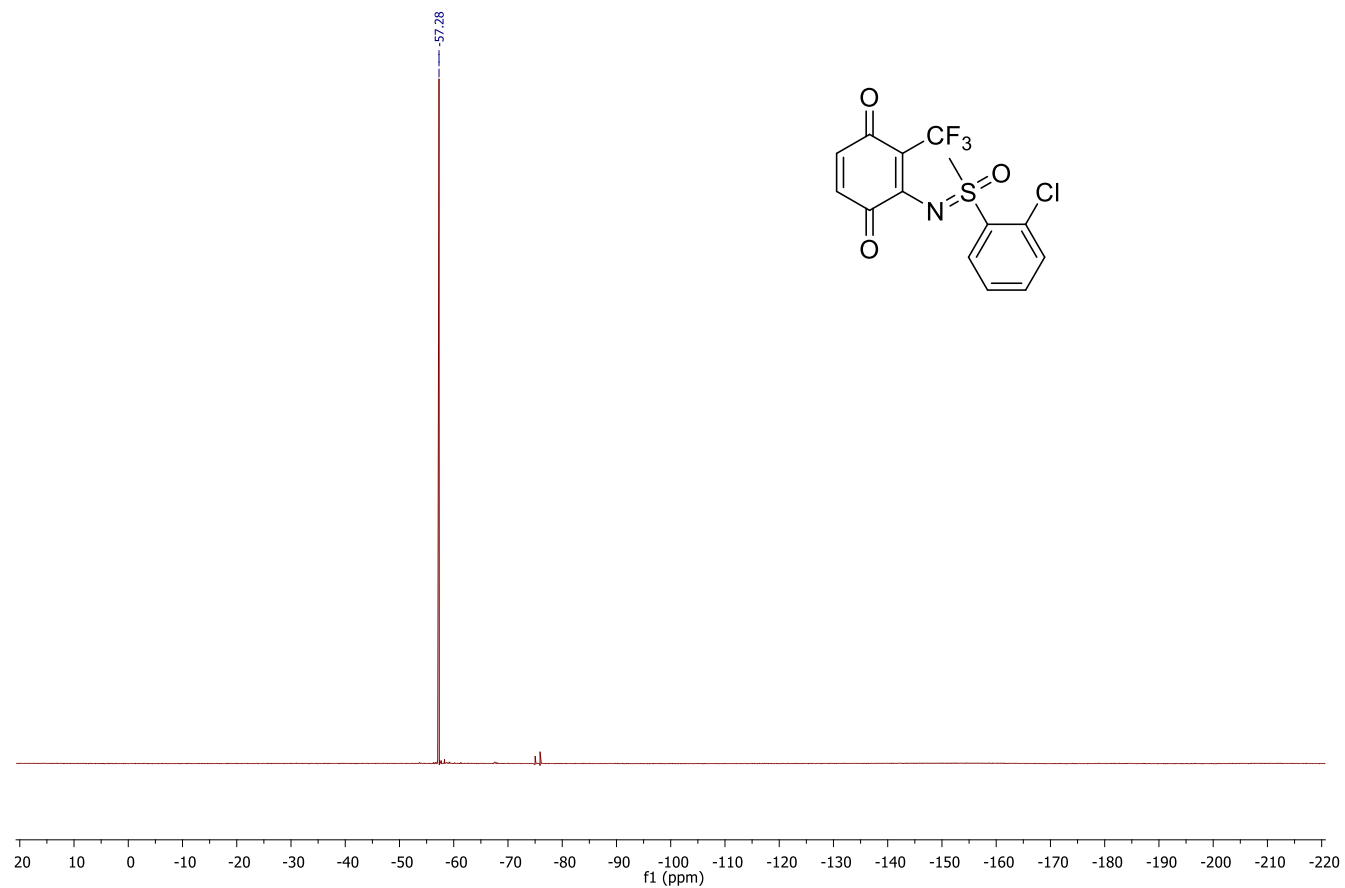



# $^{13}\text{C}$ $\{^1\text{H}\}$ NMR (101 MHz) of 5d in $\text{CDCl}_3$

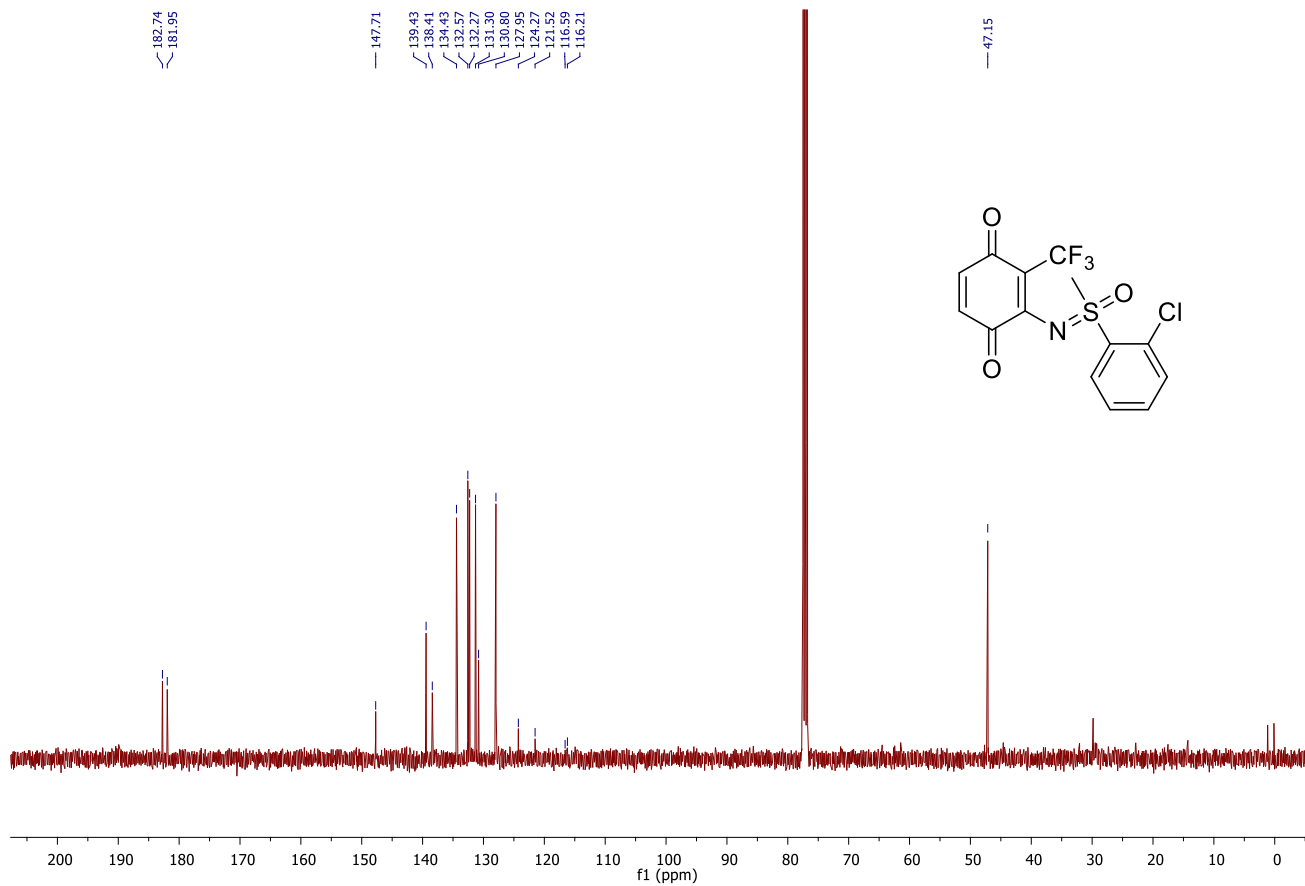

# HRMS of 5d

## Elemental Composition Report

Page 1

### Single Mass Analysis

Tolerance = 100.0 PPM / DBE: min = -1.5, max = 50.0

Element prediction: Off

Number of isotope peaks used for i-FIT = 3

Monoisotopic Mass, Even Electron Ions

129 formula(e) evaluated with 1 results within limits (up to 3 closest results for each mass)

Elements Used:

C: 0-14 H: 0-100 N: 0-1 O: 0-3 F: 0-3 S: 0-1 Cl: 0-1

BQS-5-CF3

QMI DIVISION, CSIR-IIIM JAMMU  
Xevo G2-XS QTOF YFC2015

05-Jul-2023

14:18:11

1: TOF MS ES+

3.32e+006

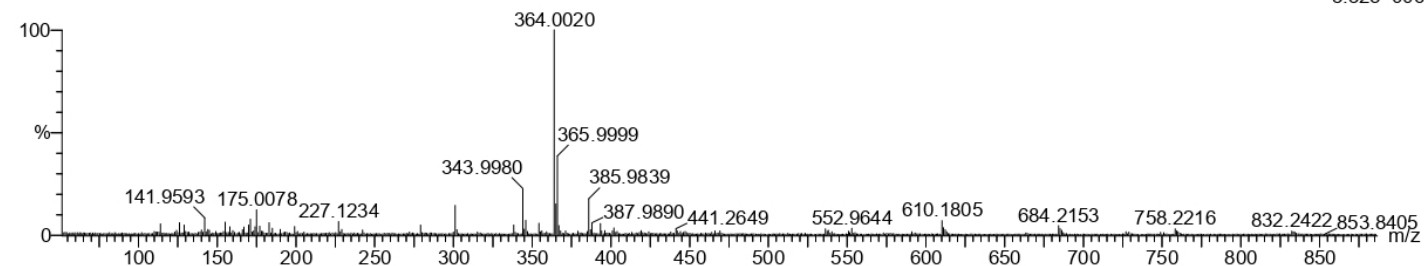

Minimum: -1.5  
Maximum: 2.0 100.0 50.0

| Mass     | Calc. Mass | mDa  | PPM  | DBE | i-FIT | Norm | Conf (%) | Formula              |
|----------|------------|------|------|-----|-------|------|----------|----------------------|
| 364.0020 | 364.0022   | -0.2 | -0.5 | 8.5 | 30.6  | n/a  | n/a      | C14 H10 N O3 F3 S Cl |

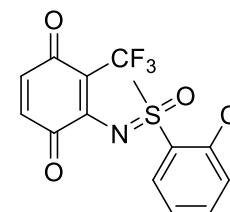

# $^1\text{H}$ NMR (400 MHz) of 5e in $\text{CDCl}_3$

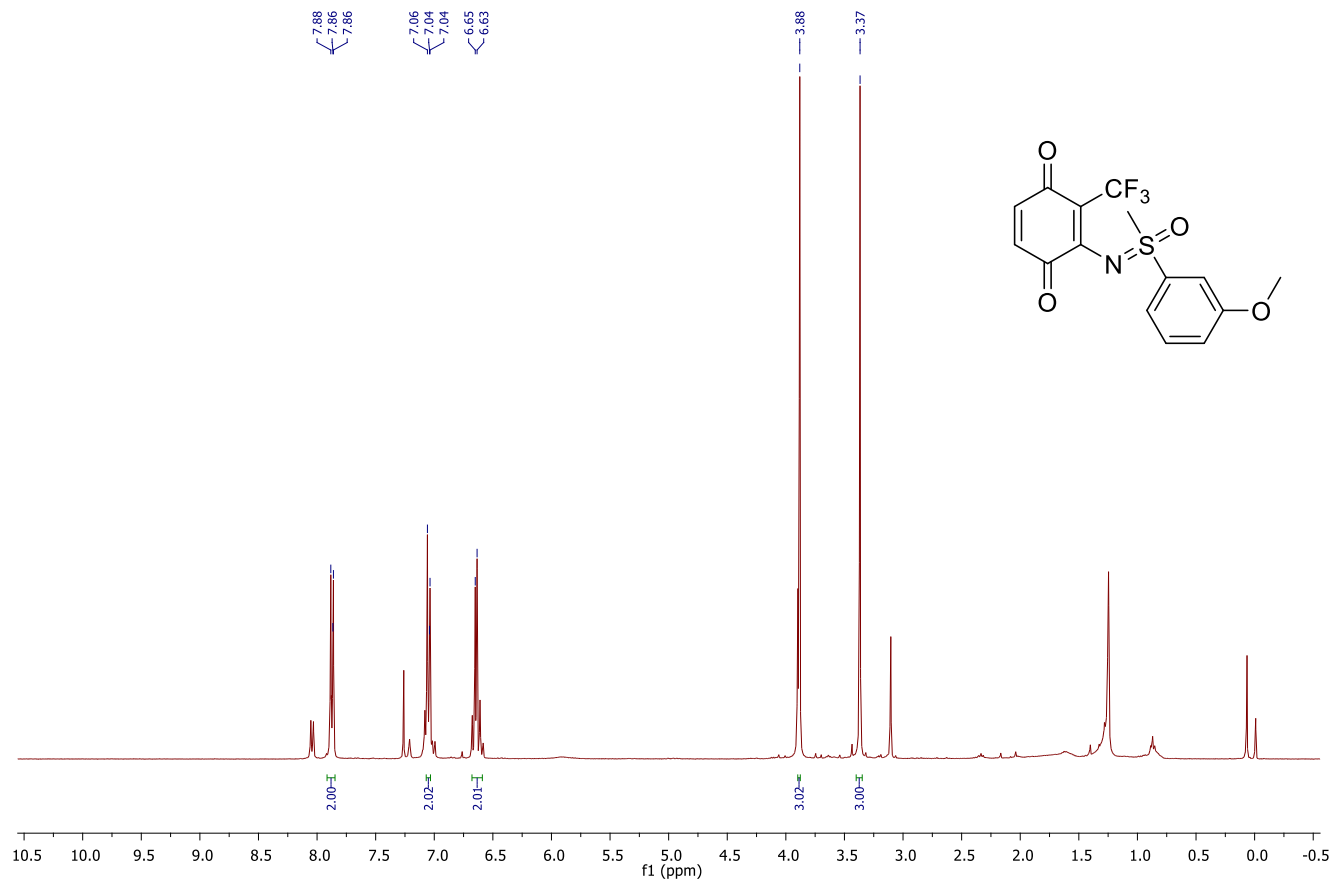

**$^{19}\text{F}$  NMR (377 MHz) of 5e in  $\text{CDCl}_3$**

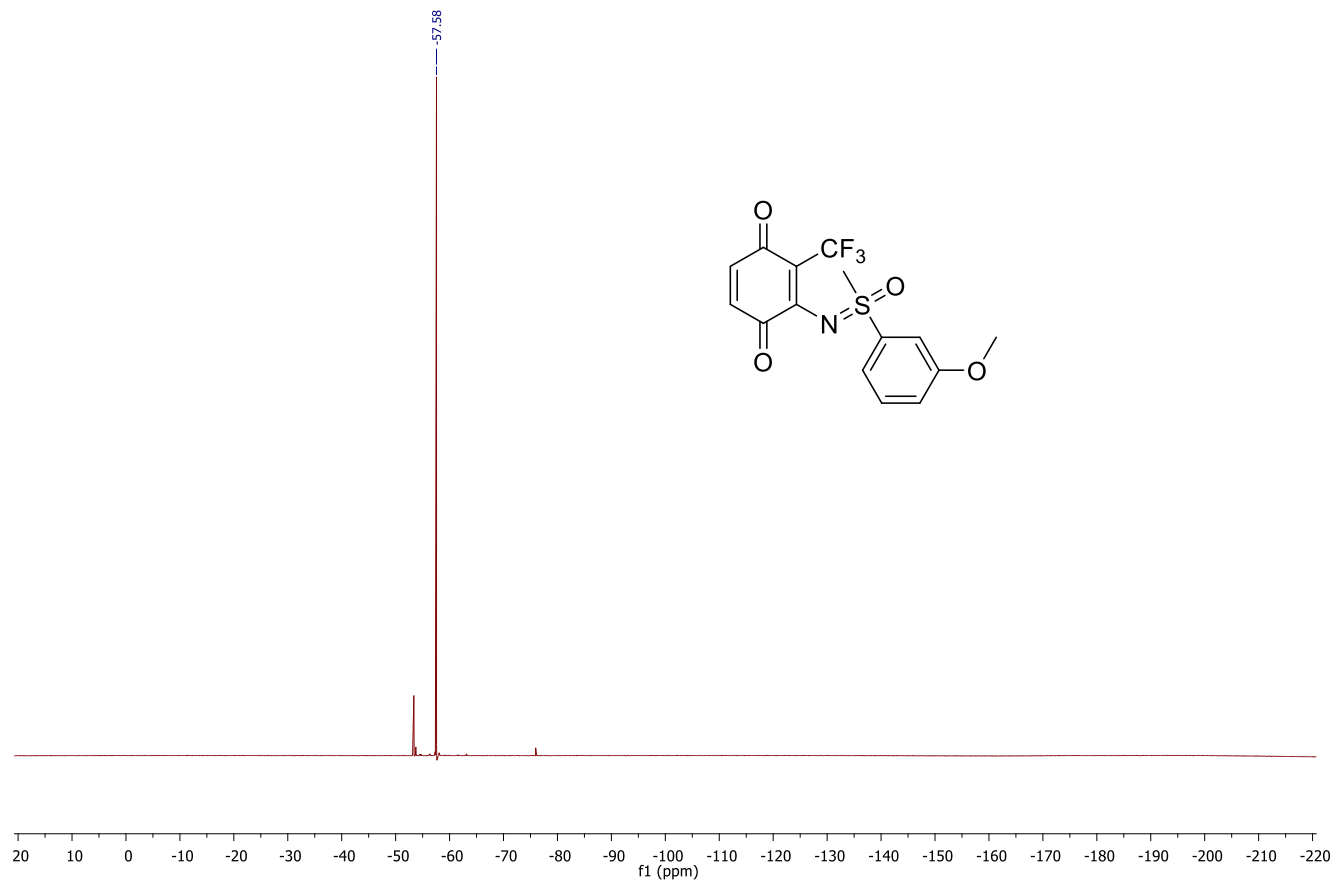

# $^{13}\text{C}$ $\{^1\text{H}\}$ NMR (101 MHz) of 5e in $\text{CDCl}_3$

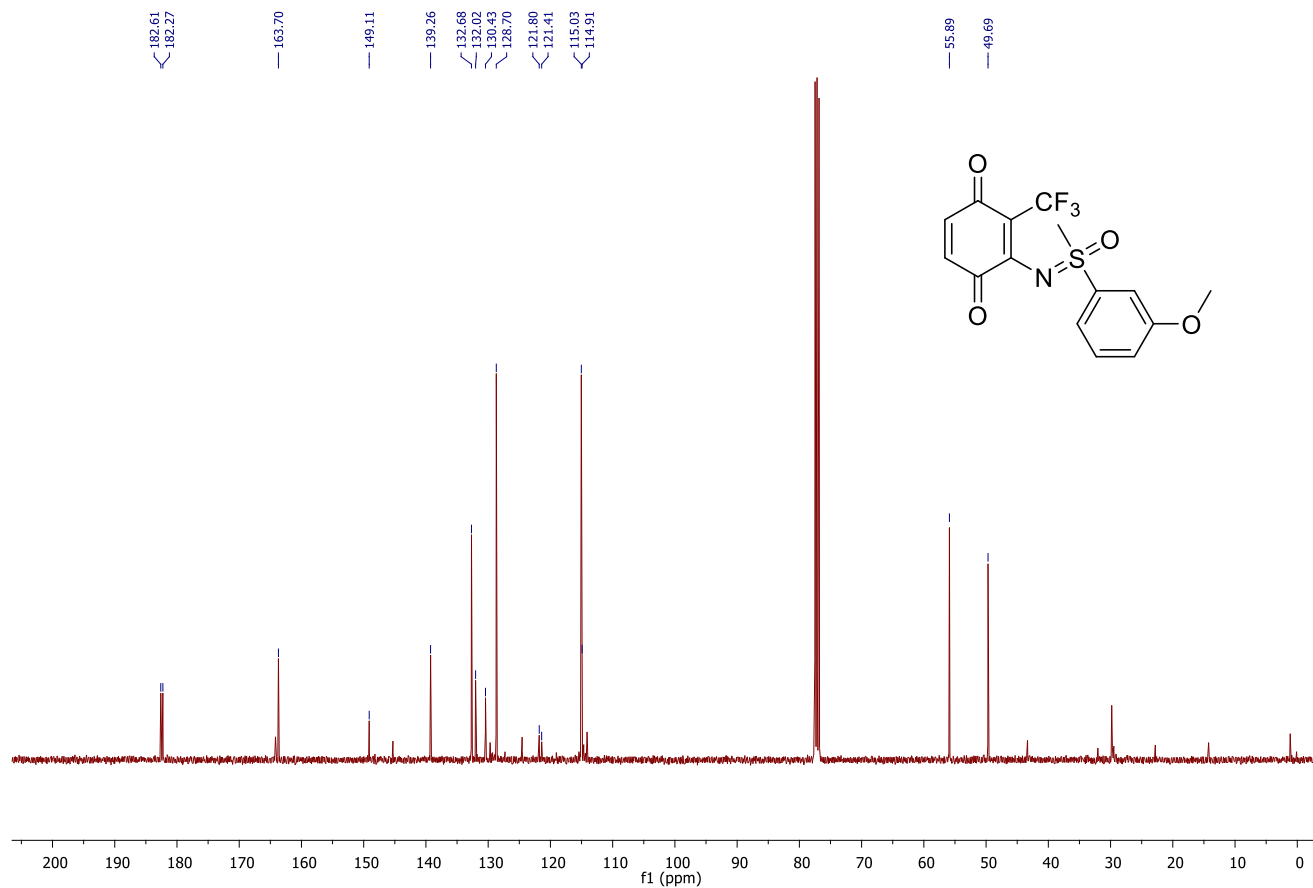

# HRMS of 5e

## Elemental Composition Report

Page 1

### Single Mass Analysis

Tolerance = 100.0 PPM / DBE: min = -1.5, max = 50.0

Element prediction: Off

Number of isotope peaks used for i-FIT = 3

Monoisotopic Mass, Even Electron Ions

81 formula(e) evaluated with 1 results within limits (up to 3 closest results for each mass)

Elements Used:

C: 0-15 H: 0-100 N: 0-1 O: 0-4 F: 0-3 S: 0-1

BQ-OMe

QMI DIVISION, CSIR-IIIM JAMMU  
Xevo G2-XS QTOF YFC2015

050723\_06 7 (0.155)

05-Jul-2023  
14:23:20  
1: TOF MS ES+  
1.50e+007

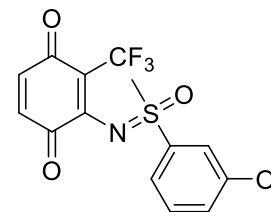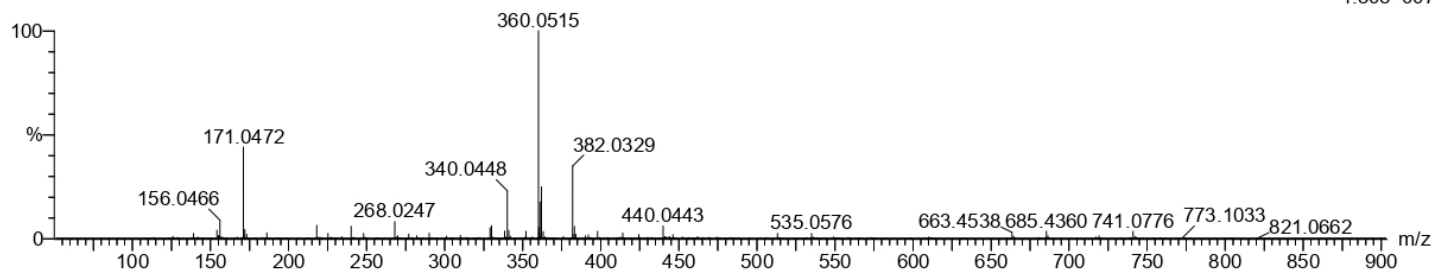

Minimum: -1.5  
Maximum: 2.0 100.0 50.0

| Mass     | Calc. Mass | mDa  | PPM  | DBE | i-FIT  | Norm | Conf (%) | Formula           |
|----------|------------|------|------|-----|--------|------|----------|-------------------|
| 360.0515 | 360.0517   | -0.2 | -0.6 | 8.5 | 1038.0 | n/a  | n/a      | C15 H13 N O4 F3 S |

# $^1\text{H}$ NMR (400 MHz) of 5f in $\text{CDCl}_3$

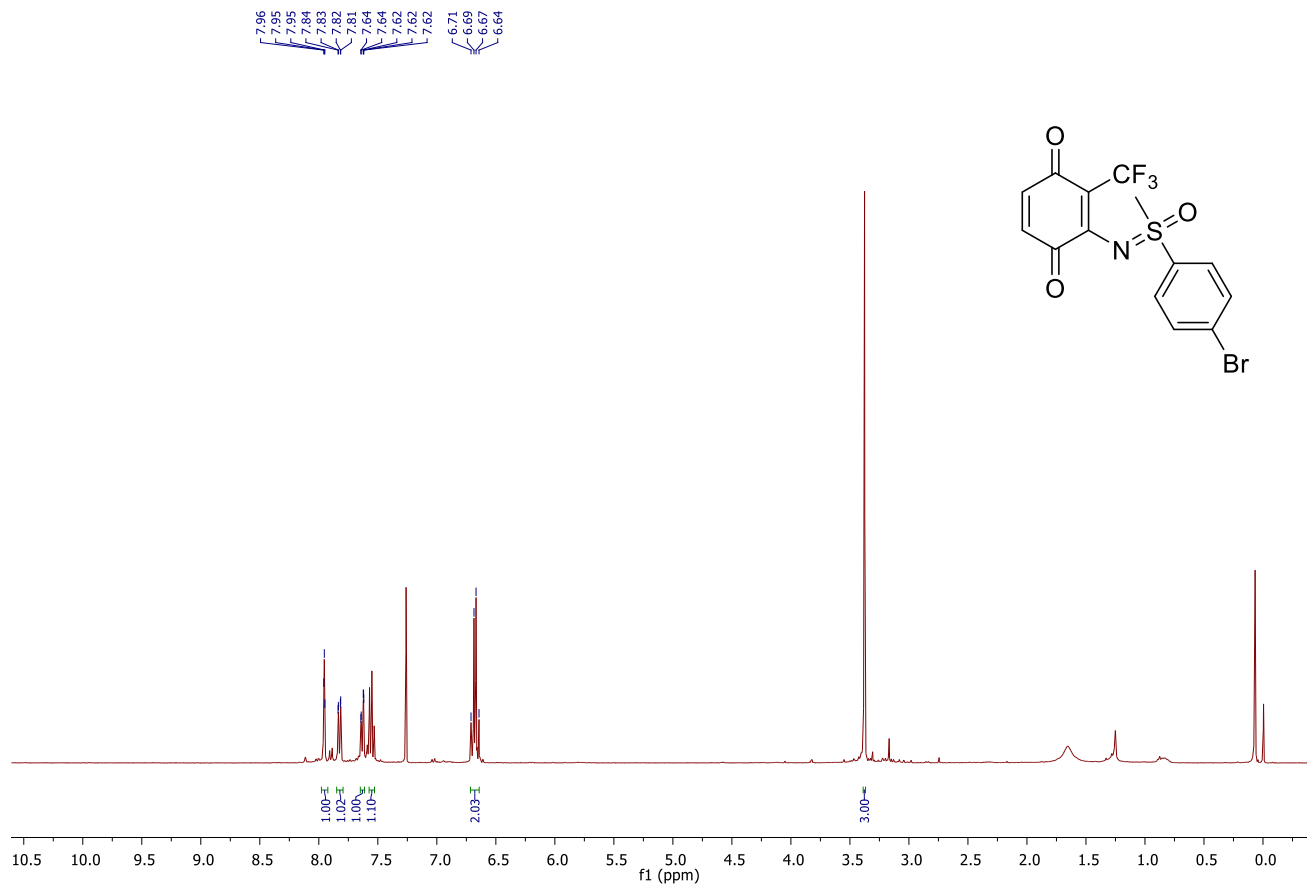

**$^{19}\text{F}$  NMR (377 MHz) of 5f in  $\text{CDCl}_3$**

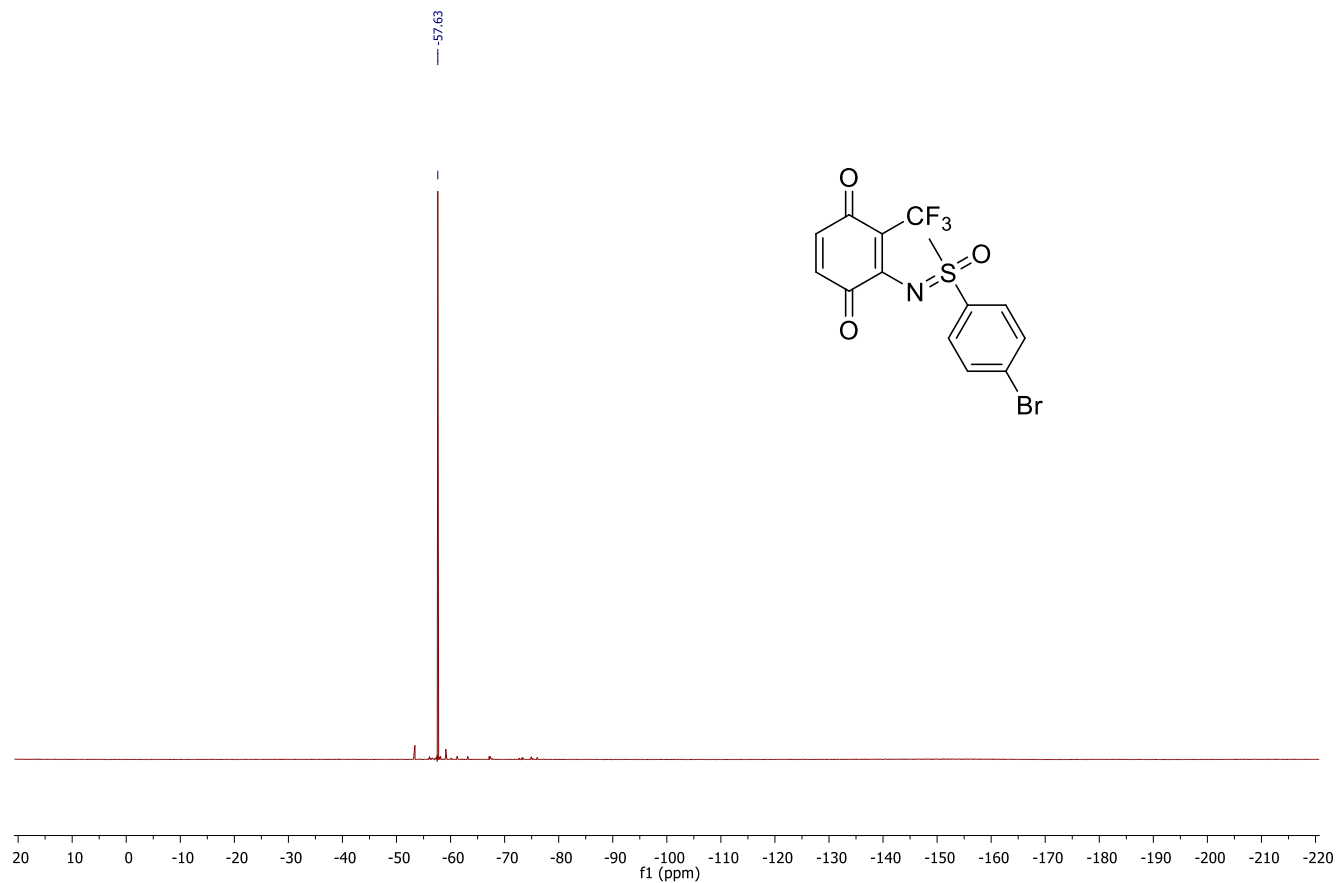



# $^{13}\text{C}$ $\{^1\text{H}\}$ NMR (101 MHz) of 5f in $\text{CDCl}_3$

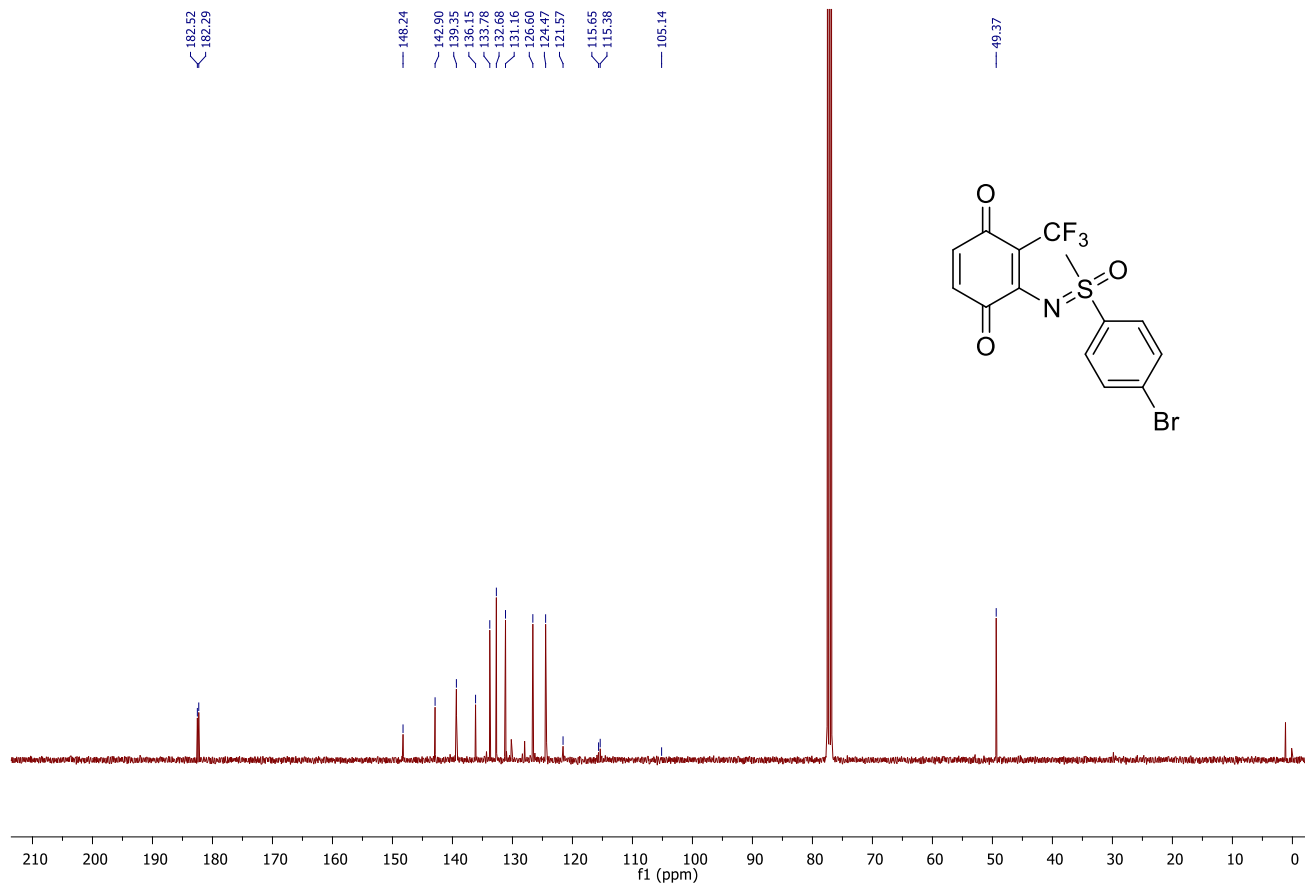

# HRMS of 5f

## Elemental Composition Report

Page 1

### Single Mass Analysis

Tolerance = 50.0 PPM / DBE: min = -1.5, max = 50.0

Element prediction: Off

Number of isotope peaks used for i-FIT = 4

Monoisotopic Mass, Even Electron Ions

129 formula(e) evaluated with 1 results within limits (all results (up to 1000) for each mass)

Elements Used:

C: 0-14 H: 0-100 N: 0-1 O: 0-3 F: 0-3 S: 0-1 Br: 0-1

280623\_04 10 (0.225)

1: TOF MS ES+

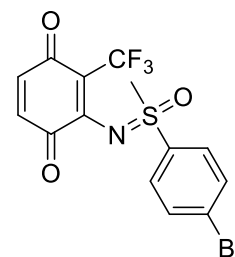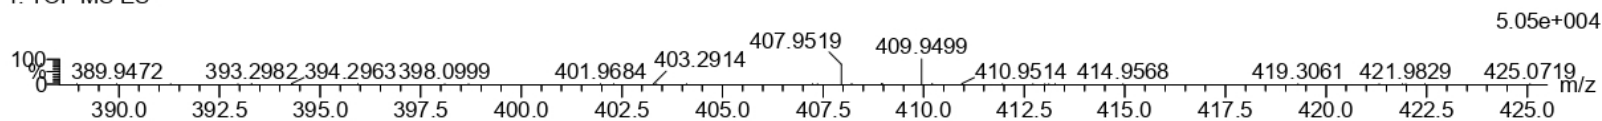

Minimum: -1.5  
Maximum: 5.0 50.0 50.0

| Mass     | Calc. Mass | mDa | PPM | DBE | i-FIT | Norm | Conf (%) | Formula              |
|----------|------------|-----|-----|-----|-------|------|----------|----------------------|
| 407.9519 | 407.9517   | 0.2 | 0.5 | 8.5 | 76.9  | n/a  | n/a      | C14 H10 N O3 F3 S Br |

**$^1\text{H}$  NMR (400 MHz) of 5g in  $\text{CDCl}_3$**

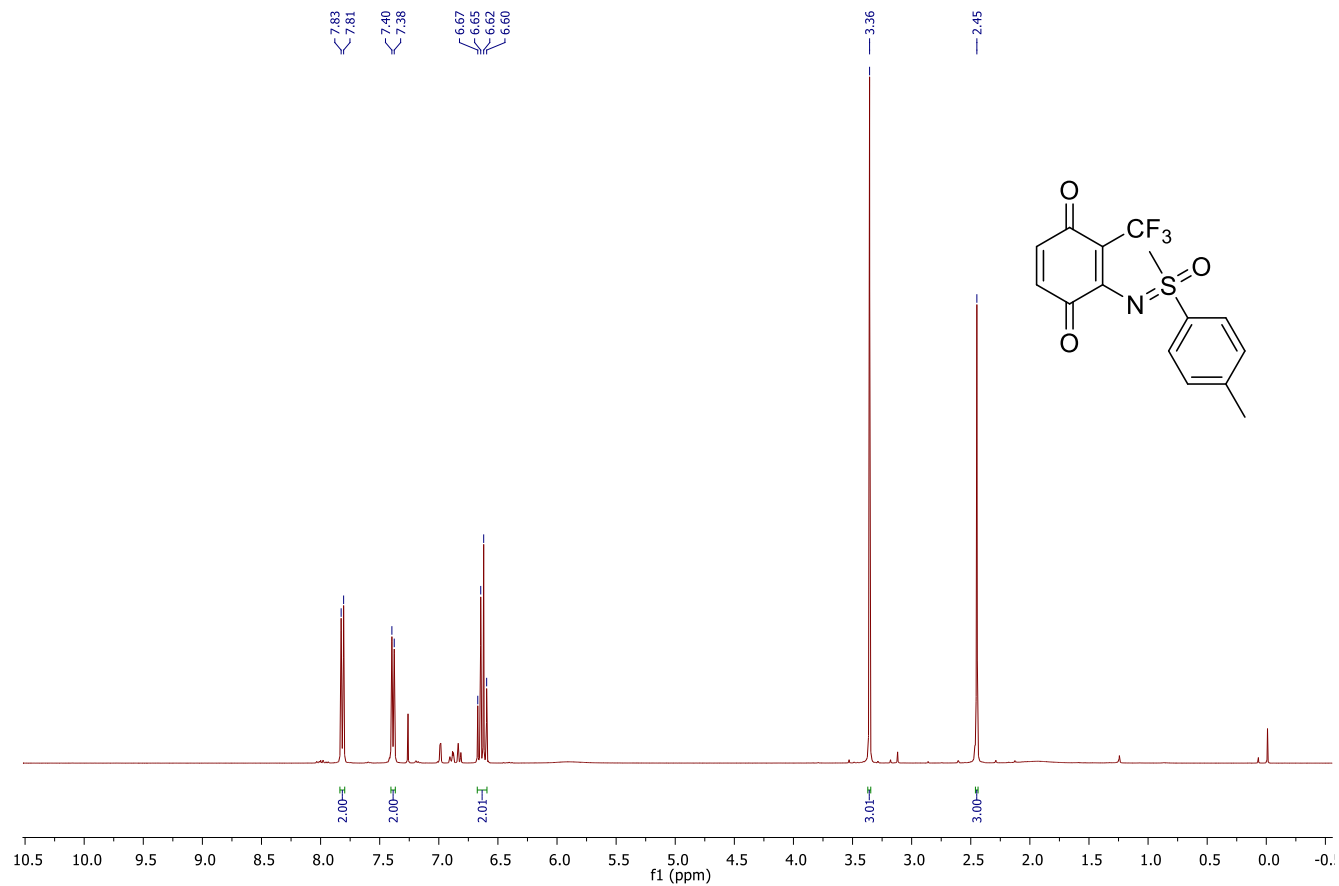

**$^{19}\text{F}$  NMR (377 MHz) of 5g in  $\text{CDCl}_3$**

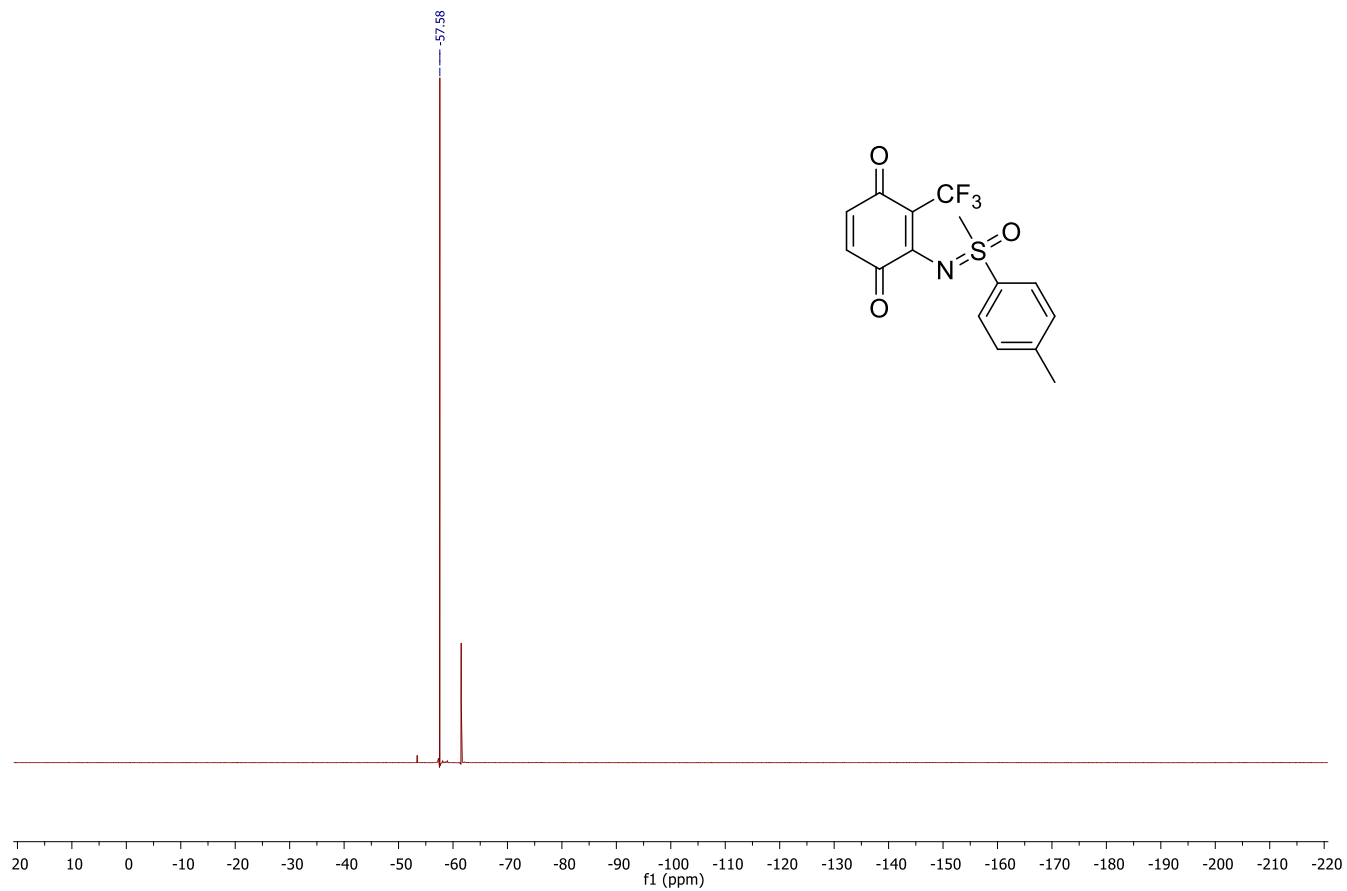

# $^{13}\text{C}$ $\{^1\text{H}\}$ NMR (101 MHz) of 5g in $\text{CDCl}_3$

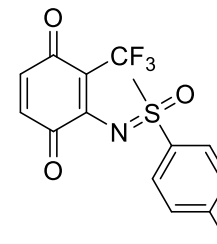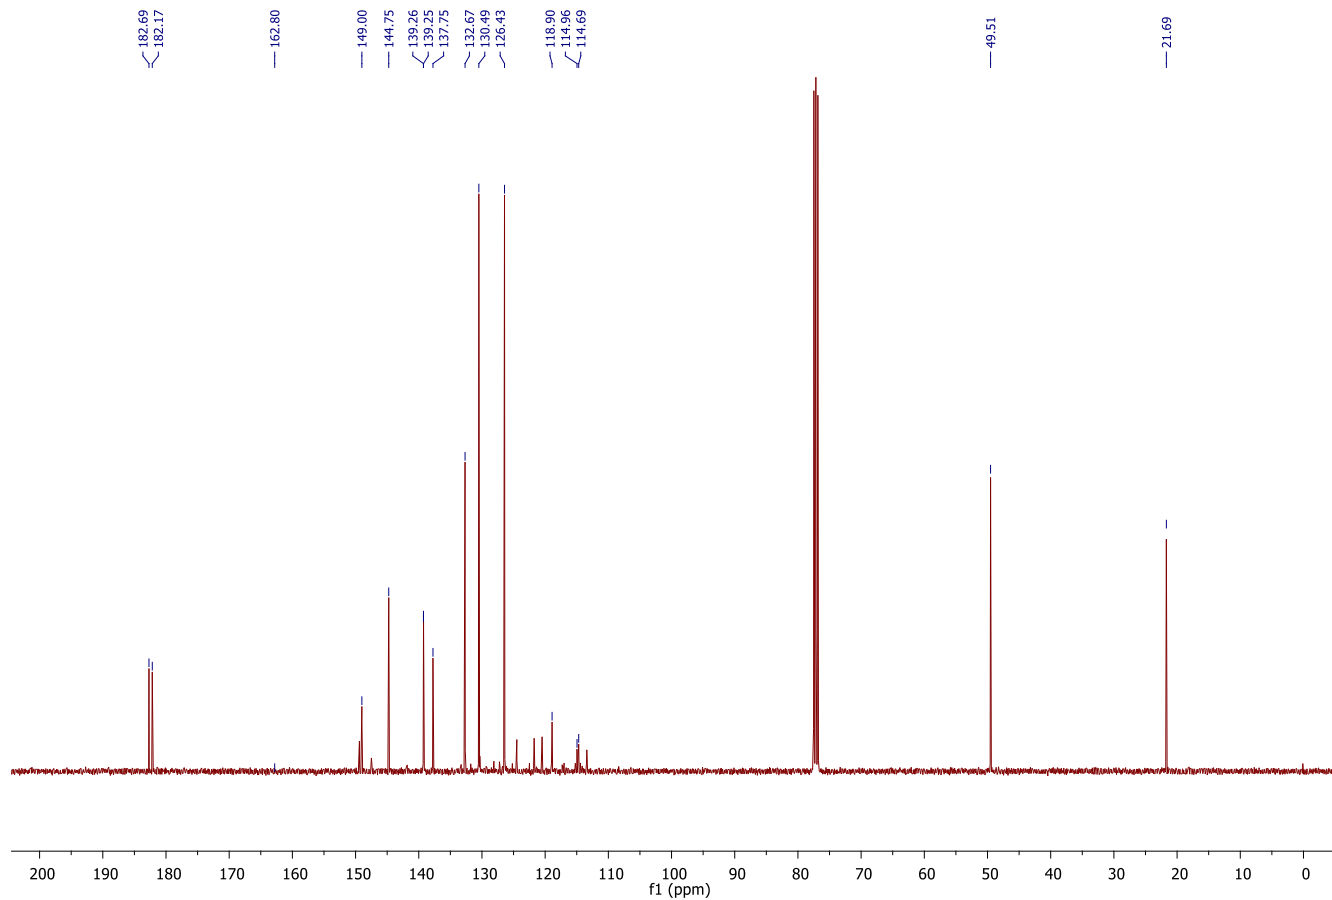

# HRMS of 5g

## Elemental Composition Report

Page 1

### Single Mass Analysis

Tolerance = 100.0 PPM / DBE: min = -1.5, max = 50.0

Element prediction: Off

Number of isotope peaks used for i-FIT = 3

Monoisotopic Mass, Even Electron Ions

65 formula(e) evaluated with 1 results within limits (up to 3 closest results for each mass)

Elements Used:

C: 0-15 H: 0-100 N: 0-1 O: 0-3 F: 0-3 S: 0-1

BQ-4Me

QMI DIVISION, CSIR-IIIM JAMMU  
Xevo G2-XS QTOF YFC2015

050723\_03 4 (0.104)

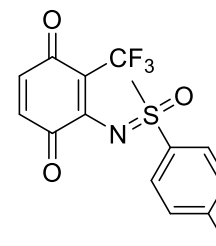

05-Jul-2023  
14:15:28  
1: TOF MS ES+  
3.77e+006

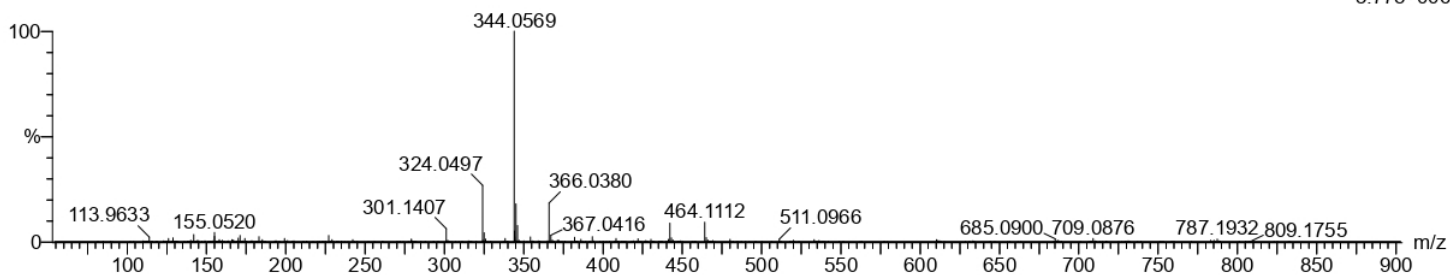

Minimum: -1.5  
Maximum: 2.0 100.0 50.0

| Mass     | Calc. Mass | mDa | PPM | DBE | i-FIT | Norm | Conf (%) | Formula           |
|----------|------------|-----|-----|-----|-------|------|----------|-------------------|
| 344.0569 | 344.0568   | 0.1 | 0.3 | 8.5 | 926.2 | n/a  | n/a      | C15 H13 N O3 F3 S |

**$^1\text{H}$  NMR (400 MHz) of 5h in  $\text{CDCl}_3$**

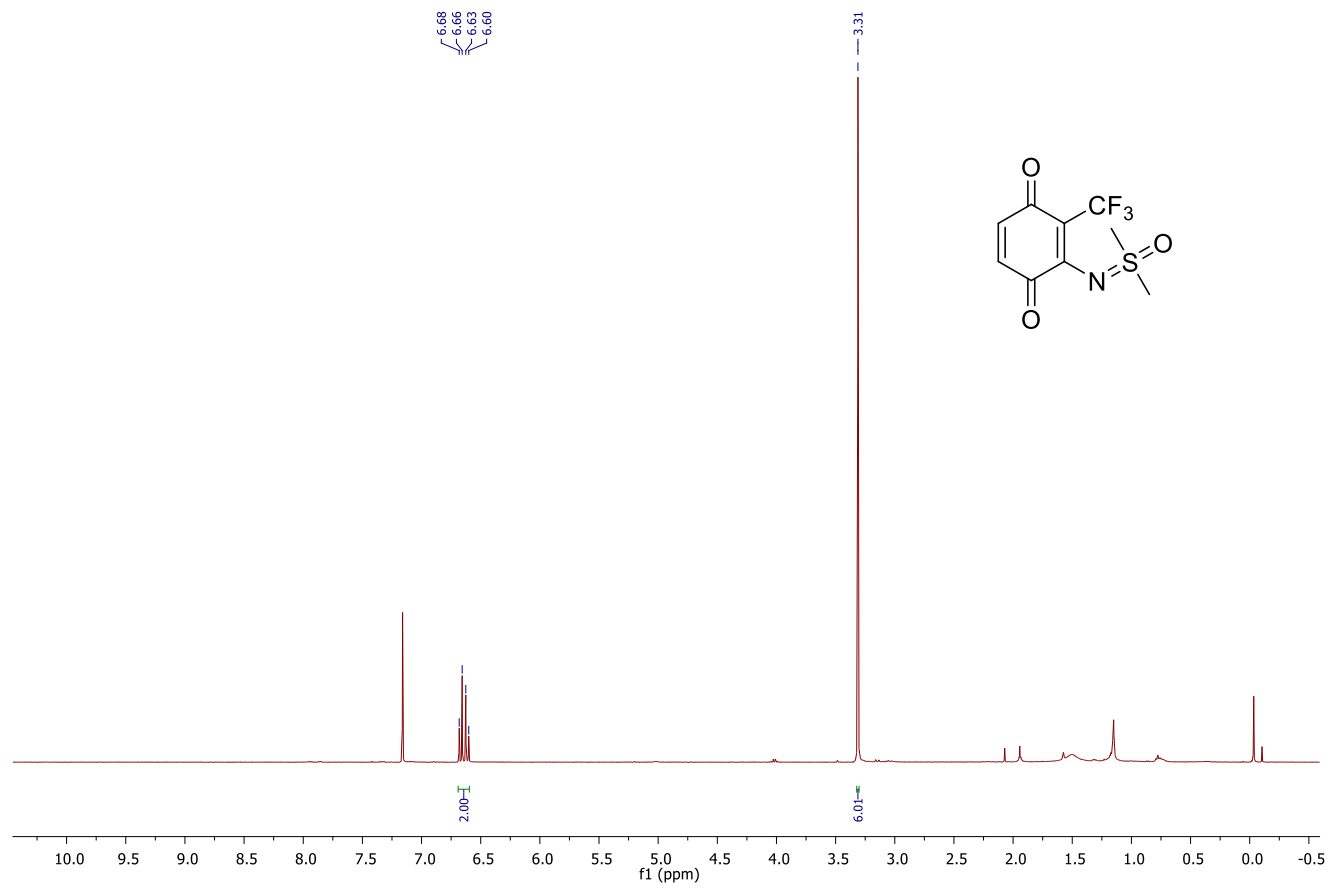

**$^{19}\text{F}$  NMR (377 MHz) of 5h in  $\text{CDCl}_3$**

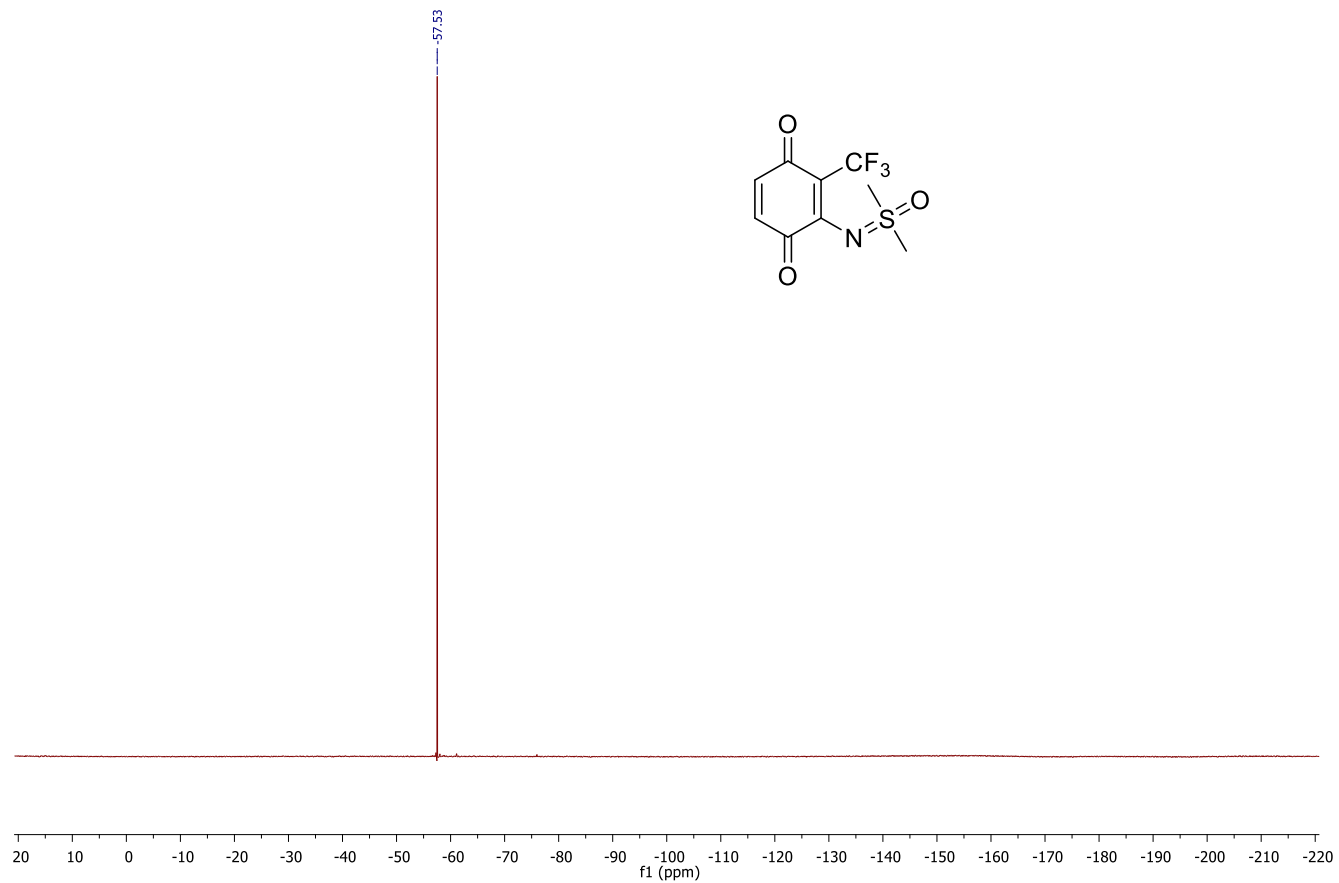



**$^{13}\text{C}$   $\{^1\text{H}\}$  NMR (101 MHz) of 5h in  $\text{CDCl}_3$**

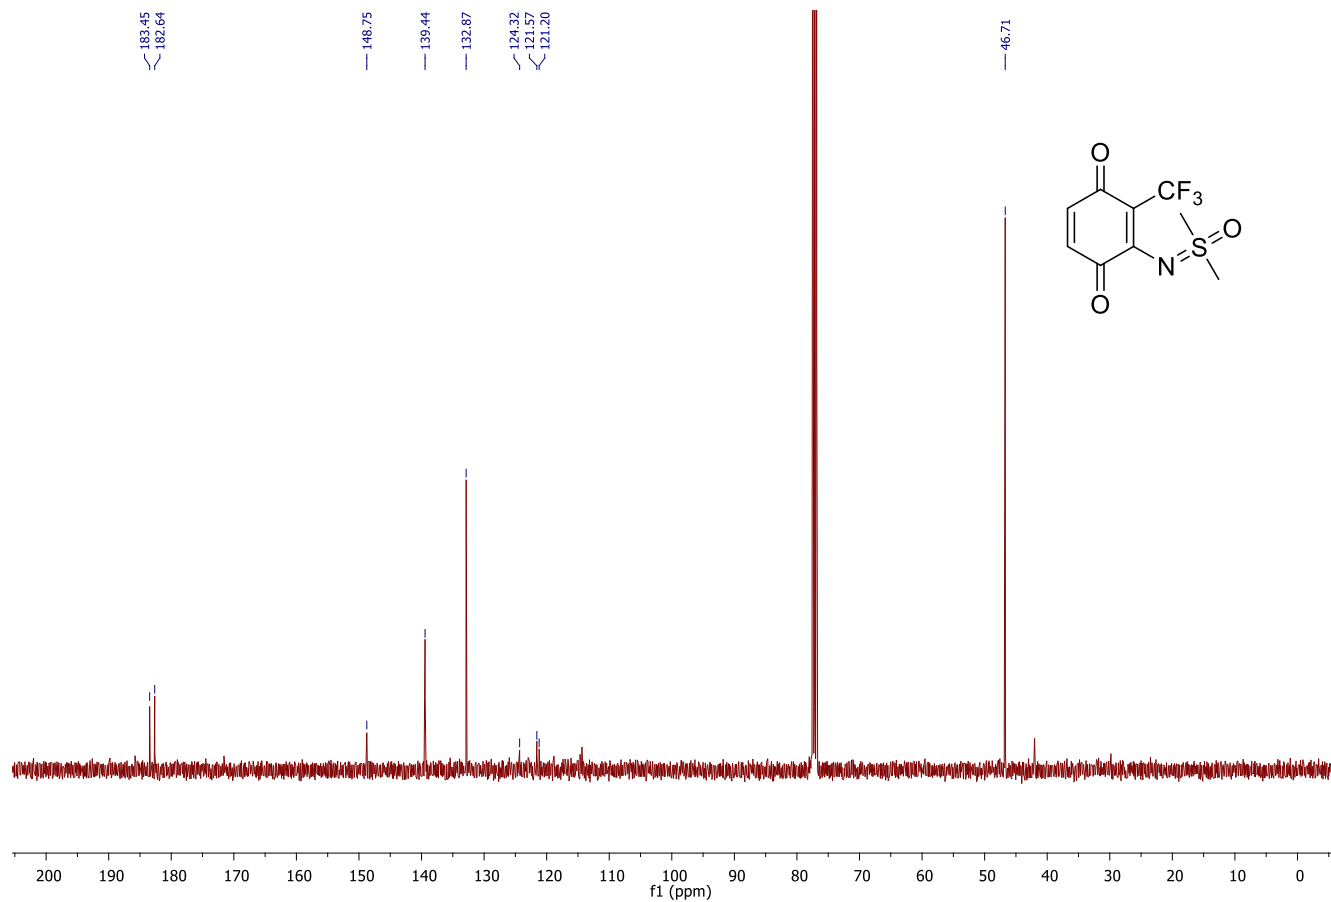

# HRMS of 5h

## Elemental Composition Report

Page 1

### Single Mass Analysis

Tolerance = 50.0 PPM / DBE: min = -1.5, max = 50.0

Element prediction: Off

Number of isotope peaks used for i-FIT = 3

Monoisotopic Mass, Even Electron Ions

75 formula(e) evaluated with 1 results within limits (up to 3 closest results for each mass)

Elements Used:

C: 0-11 H: 0-100 N: 0-1 O: 0-3 F: 0-3 S: 0-1

BQS-9-CF3

QMI DIVISION, CSIR-IIIM JAMMU  
Xevo G2-XS QTOF YFC2015

100723\_04 9 (0.208) Cm (9:11)

10-Jul-2023  
12:32:18  
1: TOF MS ES+  
3.86e+006

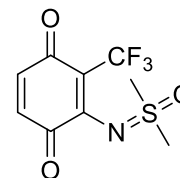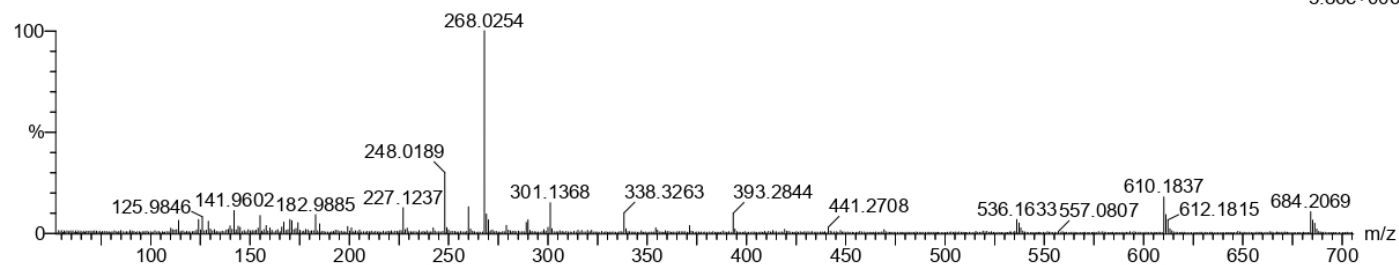

Minimum: -1.5  
Maximum: 2.0 50.0 50.0

| Mass     | Calc. Mass | mDa  | PPM  | DBE | i-FIT | Norm | Conf (%) | Formula         |
|----------|------------|------|------|-----|-------|------|----------|-----------------|
| 268.0254 | 268.0255   | -0.1 | -0.4 | 4.5 | 54.7  | n/a  | n/a      | C9 H9 N O3 F3 S |

# $^1\text{H}$ NMR (400 MHz) of **5i** in $\text{CDCl}_3$

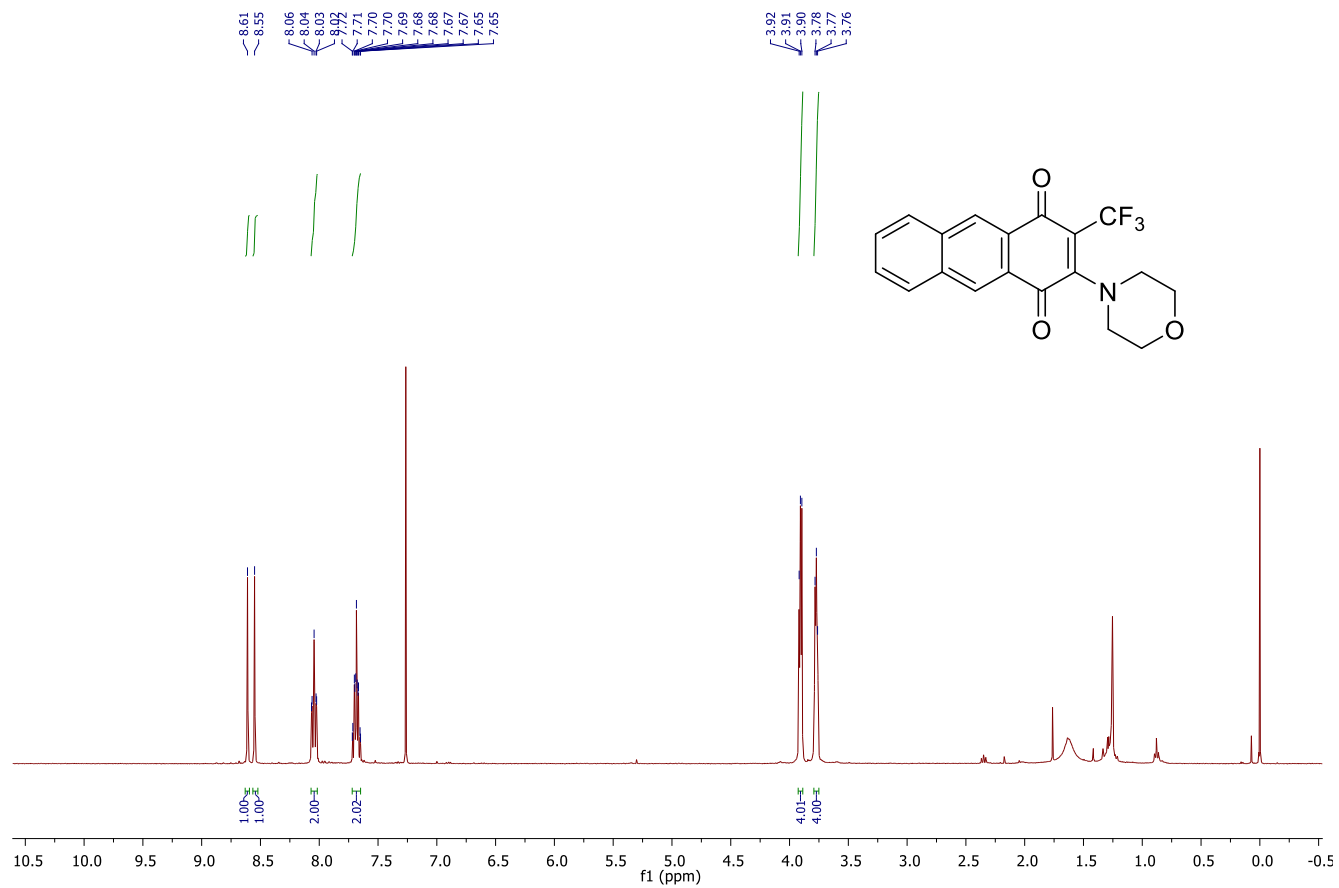

**$^{19}\text{F}$  NMR (377 MHz) of 5i in  $\text{CDCl}_3$**

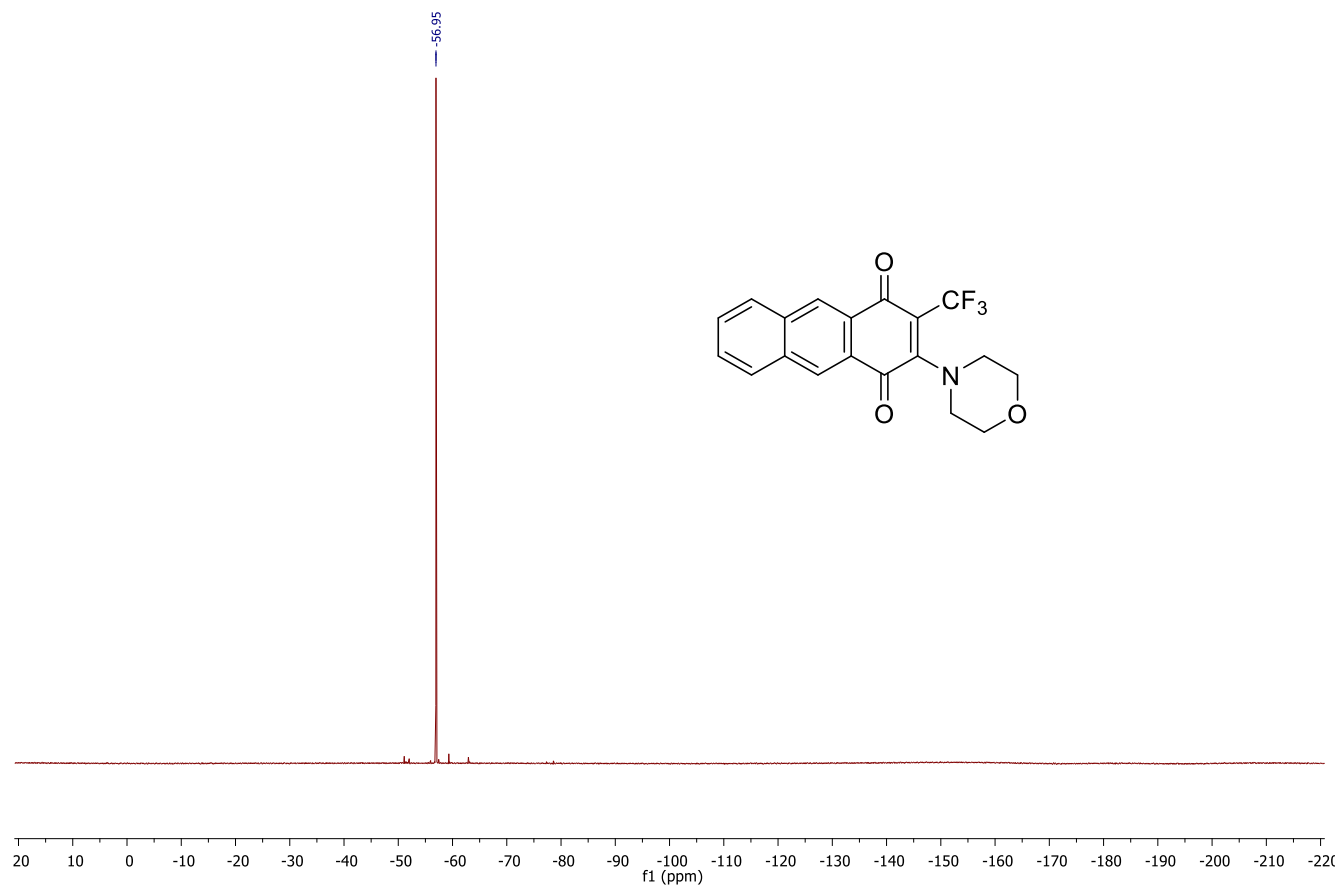

# $^{13}\text{C}$ $\{^1\text{H}\}$ NMR (101 MHz) of 5i in $\text{CDCl}_3$

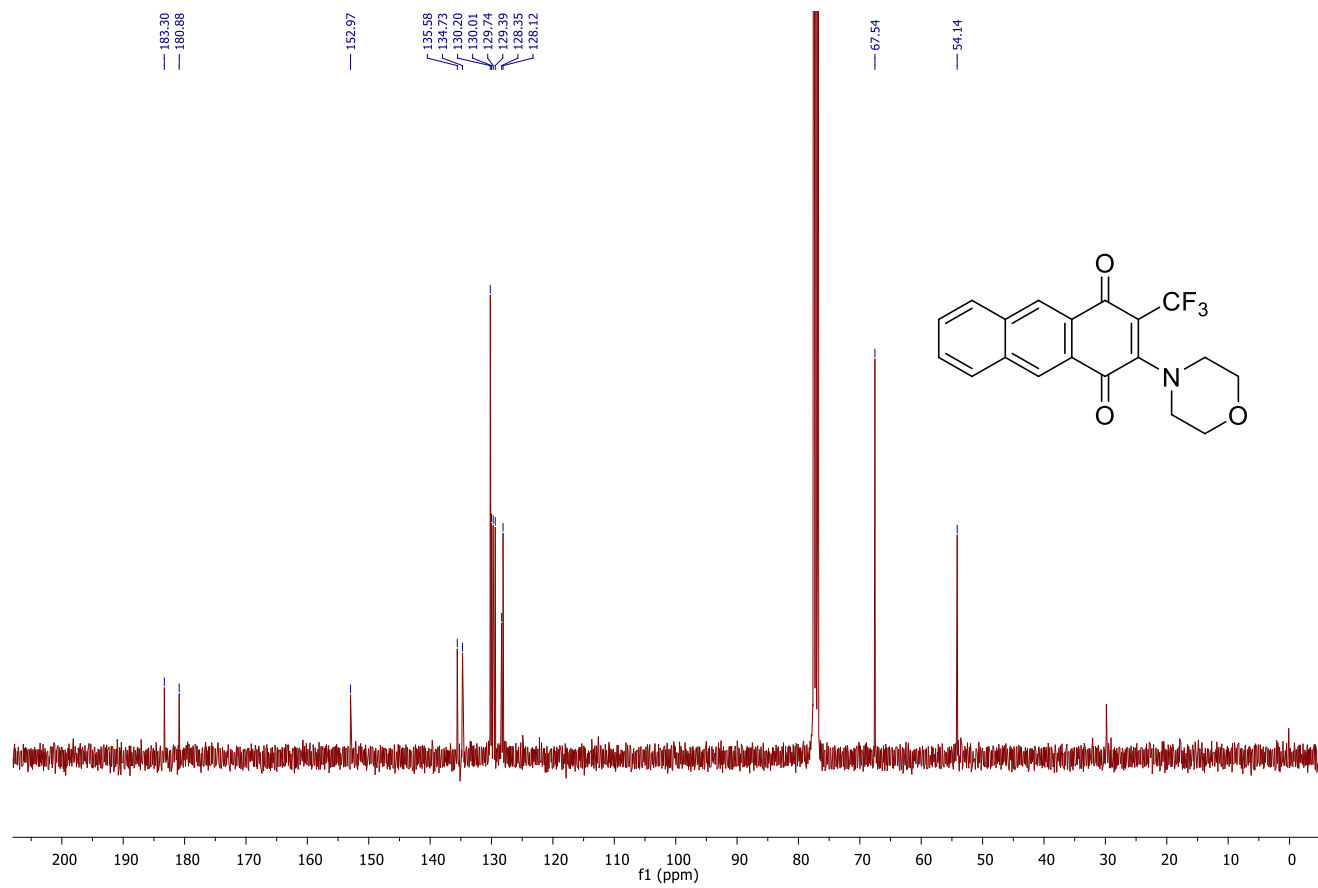

# HRMS of 5i

## Elemental Composition Report

### Single Mass Analysis

Tolerance = 50.0 PPM / DBE: min = -1.5, max = 50.0

Element prediction: Off

Number of isotope peaks used for i-FIT = 4

Monoisotopic Mass, Even Electron Ions

37 formula(e) evaluated with 1 results within limits (all results (up to 1000) for each mass)

Elements Used:

C: 0-19 H: 0-100 N: 0-1 O: 0-3 F: 0-3

280623\_02 9 (0.208)

1: TOF MS ES+

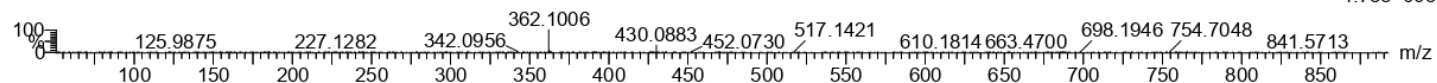

Minimum: -1.5  
Maximum: 5.0 50.0 50.0

| Mass     | Calc. Mass | mDa | PPM | DBE  | i-FIT | Norm | Conf (%) | Formula         |
|----------|------------|-----|-----|------|-------|------|----------|-----------------|
| 362.1006 | 362.1004   | 0.2 | 0.6 | 11.5 | 87.7  | n/a  | n/a      | C19 H15 N O3 F3 |

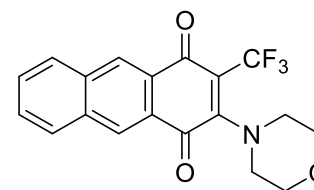

# $^1\text{H}$ NMR (400 MHz) of 5j in $\text{CDCl}_3$

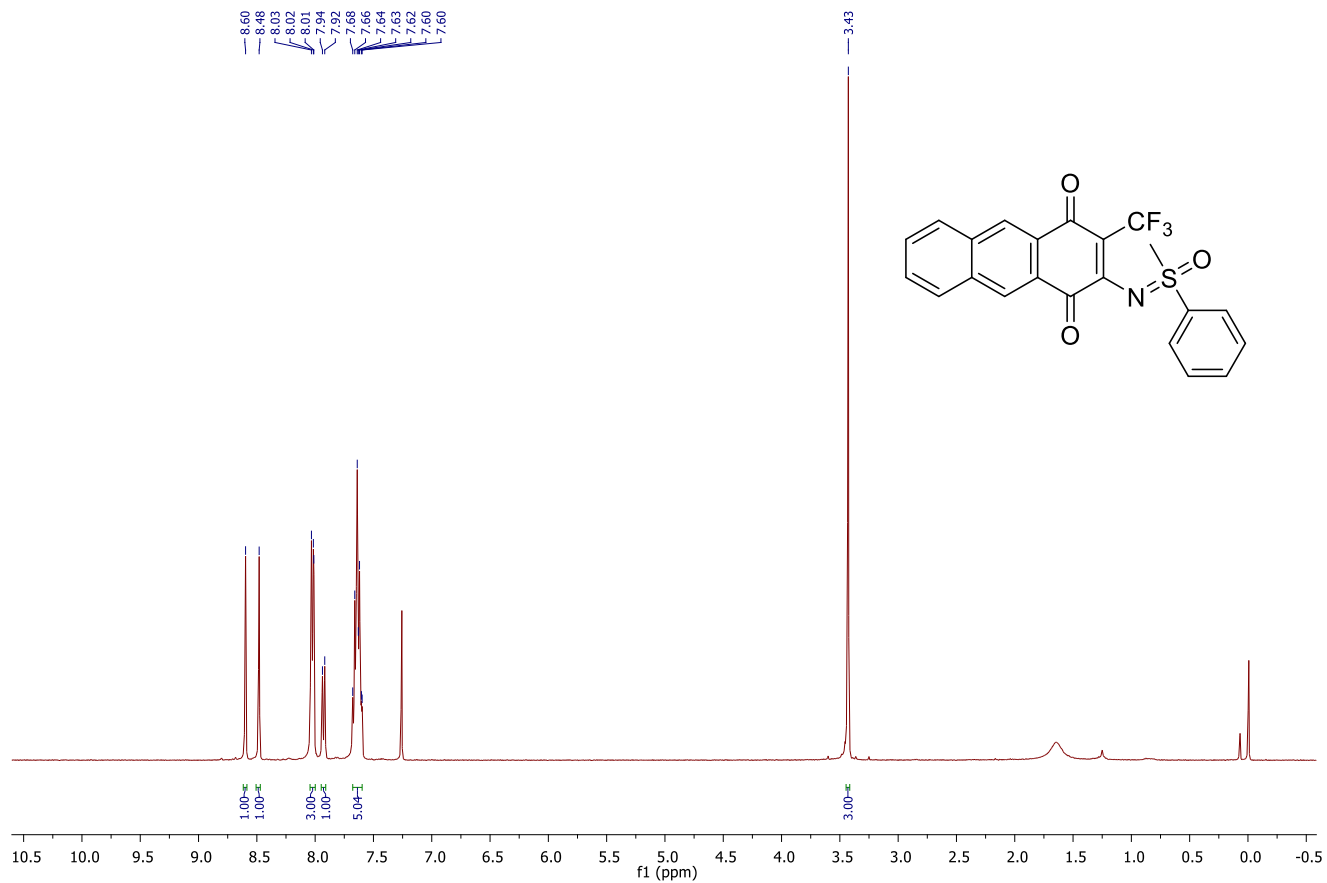

**$^{19}\text{F}$  NMR (377 MHz) of 5j in  $\text{CDCl}_3$**

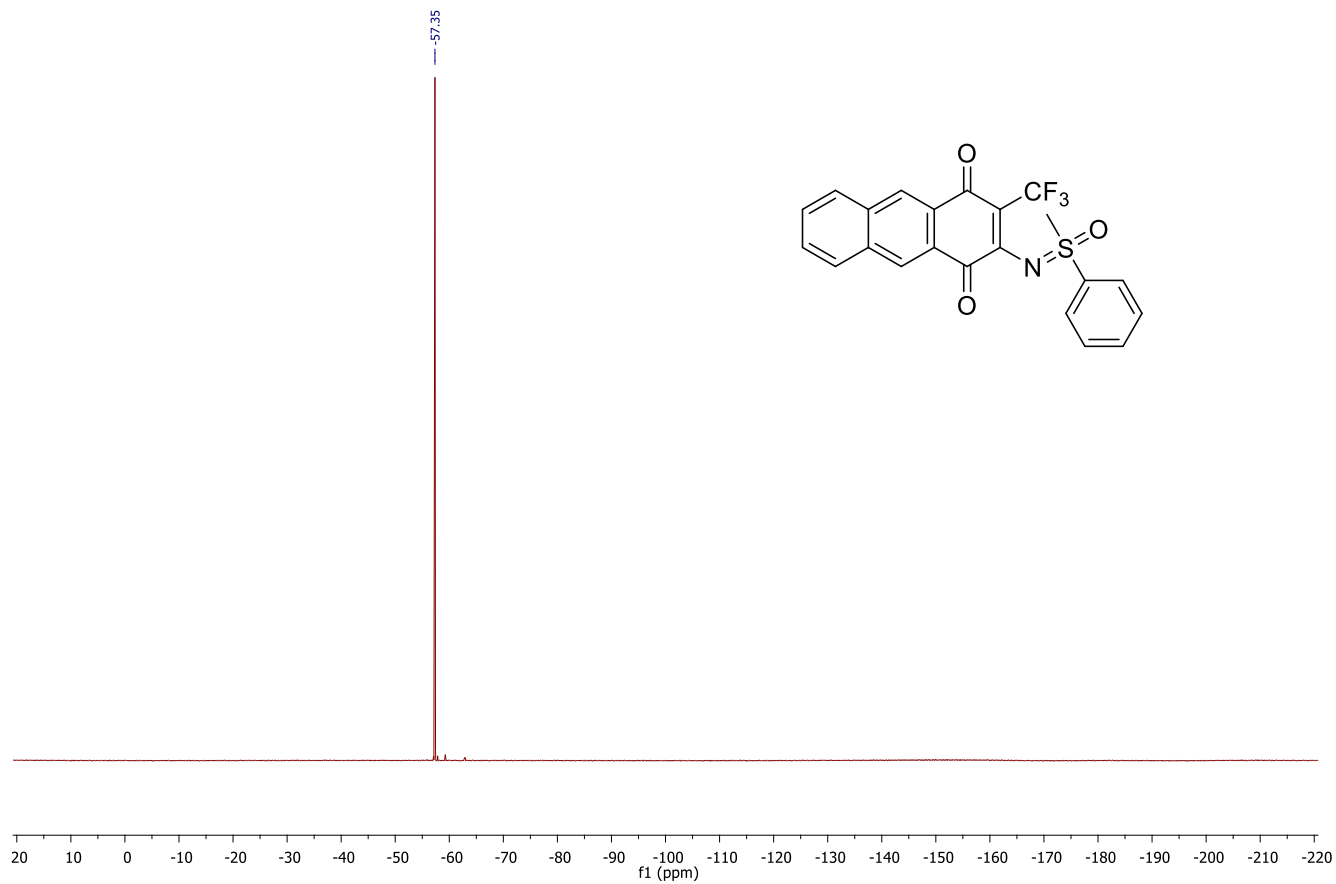



# $^{13}\text{C}$ $\{^1\text{H}\}$ NMR (101 MHz) of 5j in $\text{CDCl}_3$

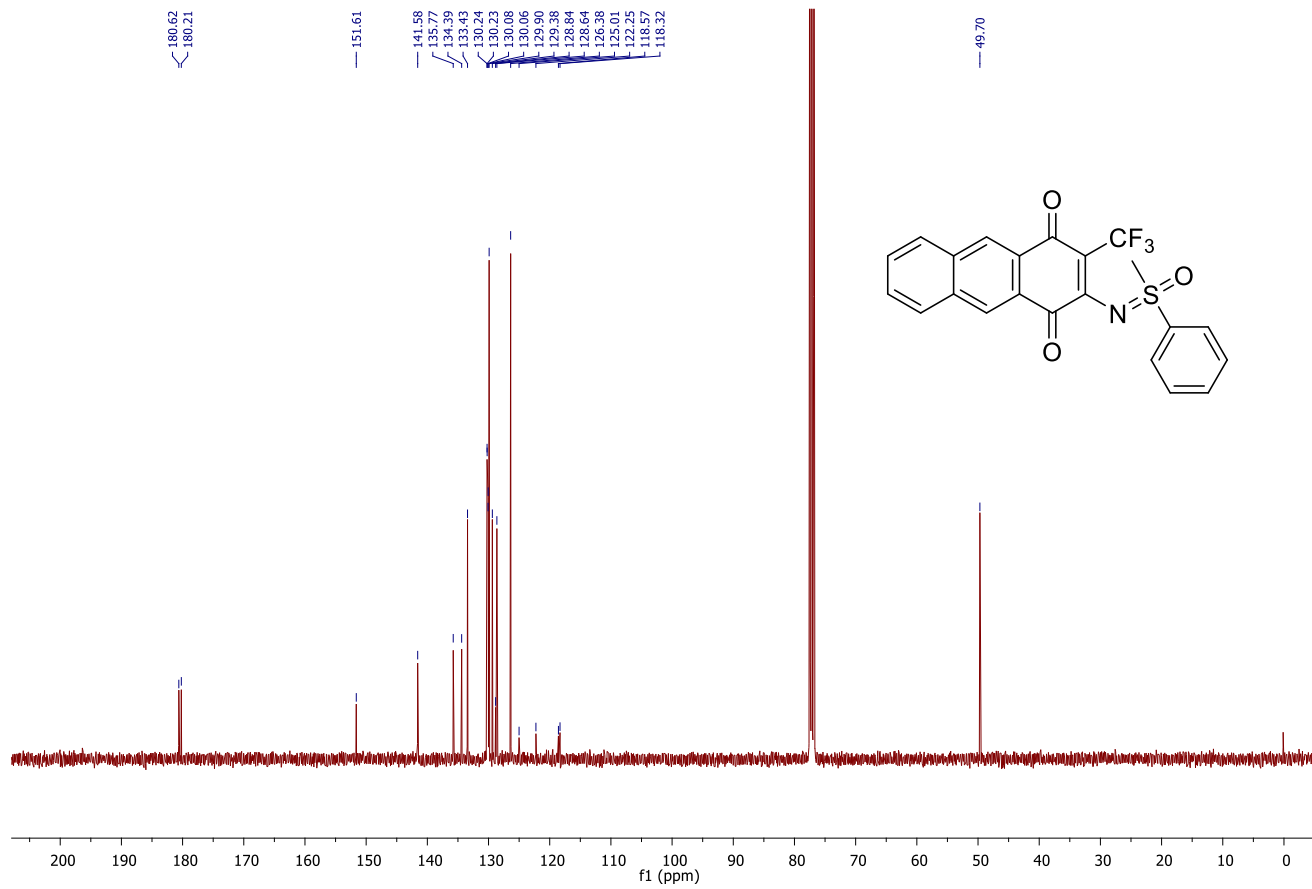

# HRMS of 5j

## Elemental Composition Report

Page 1

### Single Mass Analysis

Tolerance = 100.0 PPM / DBE: min = -1.5, max = 50.0

Element prediction: Off

Number of isotope peaks used for i-FIT = 3

Monoisotopic Mass, Even Electron Ions

69 formula(e) evaluated with 1 results within limits (up to 3 closest results for each mass)

Elements Used:

C: 0-22 H: 0-100 N: 0-1 O: 0-3 F: 0-3 S: 0-1

AQS-CF3

QMI DIVISION, CSIR-IIIM JAMMU  
Xevo G2-XS QTOF YFC2015

05-Jul-2023

14:20:46

1: TOF MS ES+

2.59e+007

050723\_05 6 (0.138)

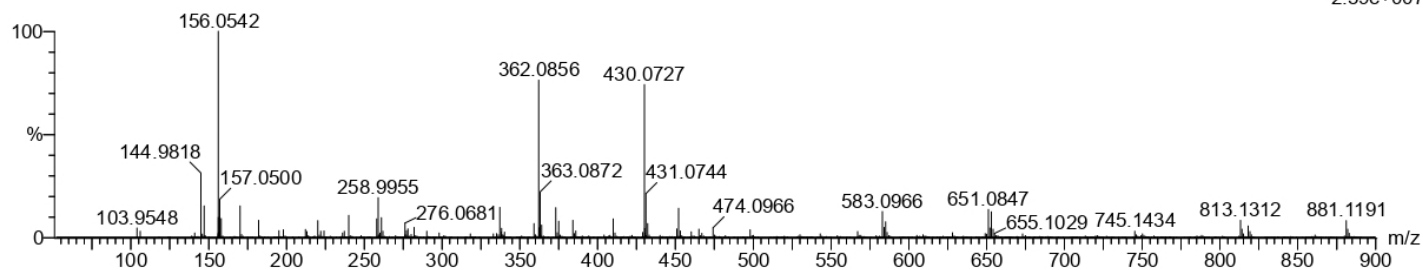

Minimum: -1.5  
Maximum: 2.0 100.0 50.0

| Mass     | Calc. Mass | mDa | PPM | DBE  | i-FIT | Norm | Conf (%) | Formula           |
|----------|------------|-----|-----|------|-------|------|----------|-------------------|
| 430.0727 | 430.0725   | 0.2 | 0.5 | 14.5 | 891.7 | n/a  | n/a      | C22 H15 N O3 F3 S |

# $^1\text{H}$ NMR (400 MHz) of 5k in $\text{CDCl}_3$

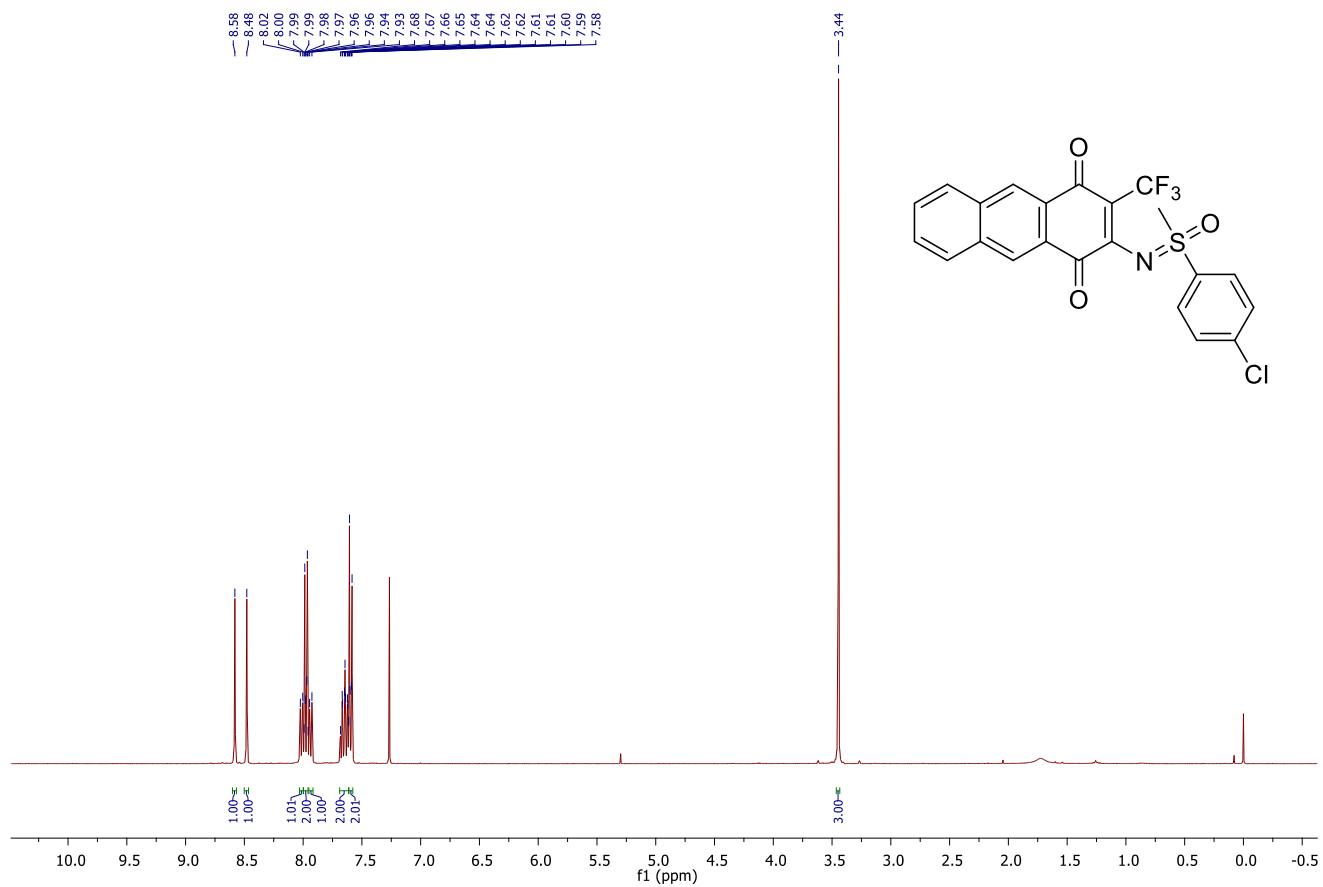

**$^{19}\text{F}$  NMR (377 MHz) of 5k in  $\text{CDCl}_3$**

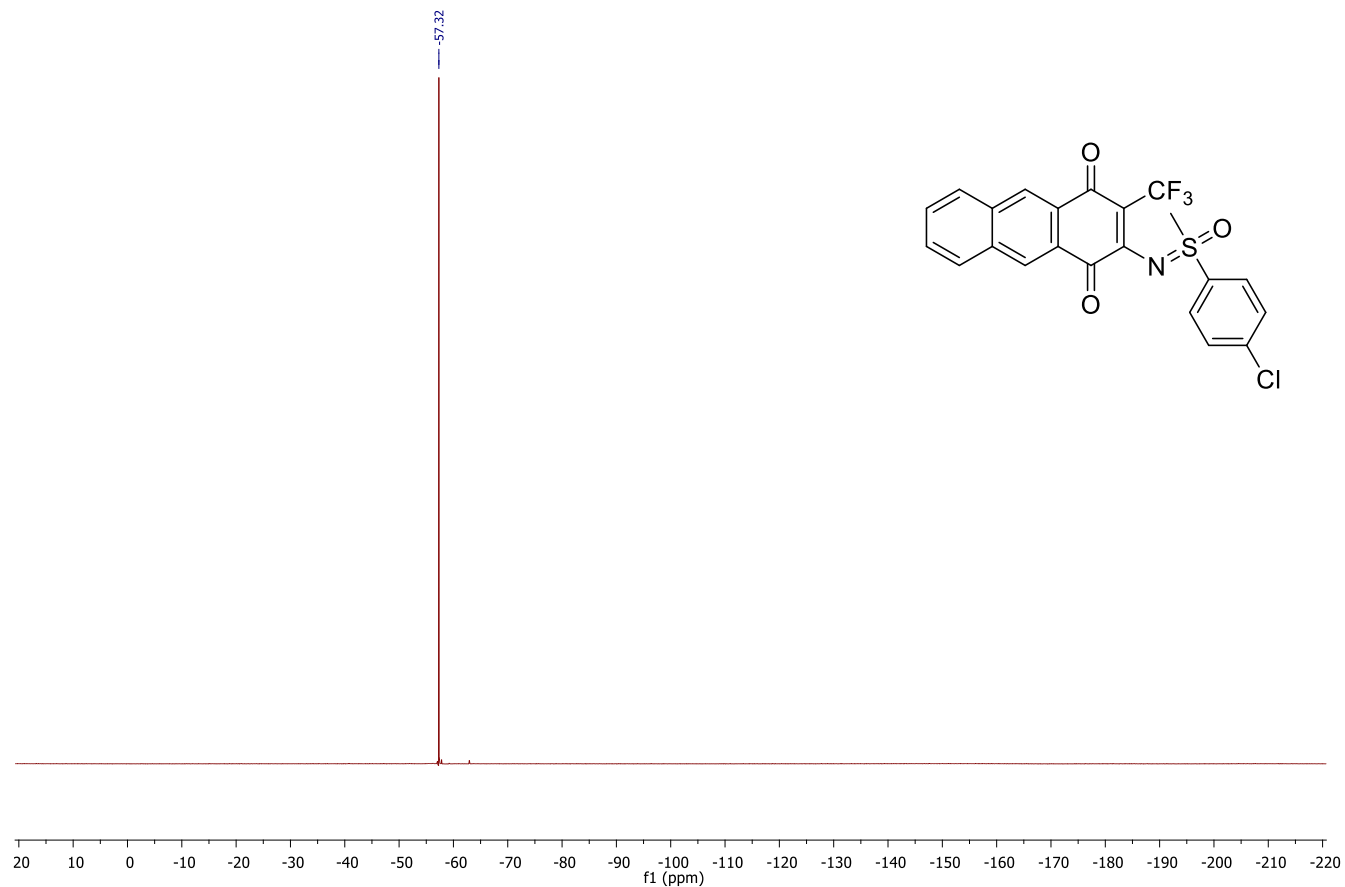

# $^{13}\text{C}$ $\{^1\text{H}\}$ NMR (101 MHz) of 5k in $\text{CDCl}_3$

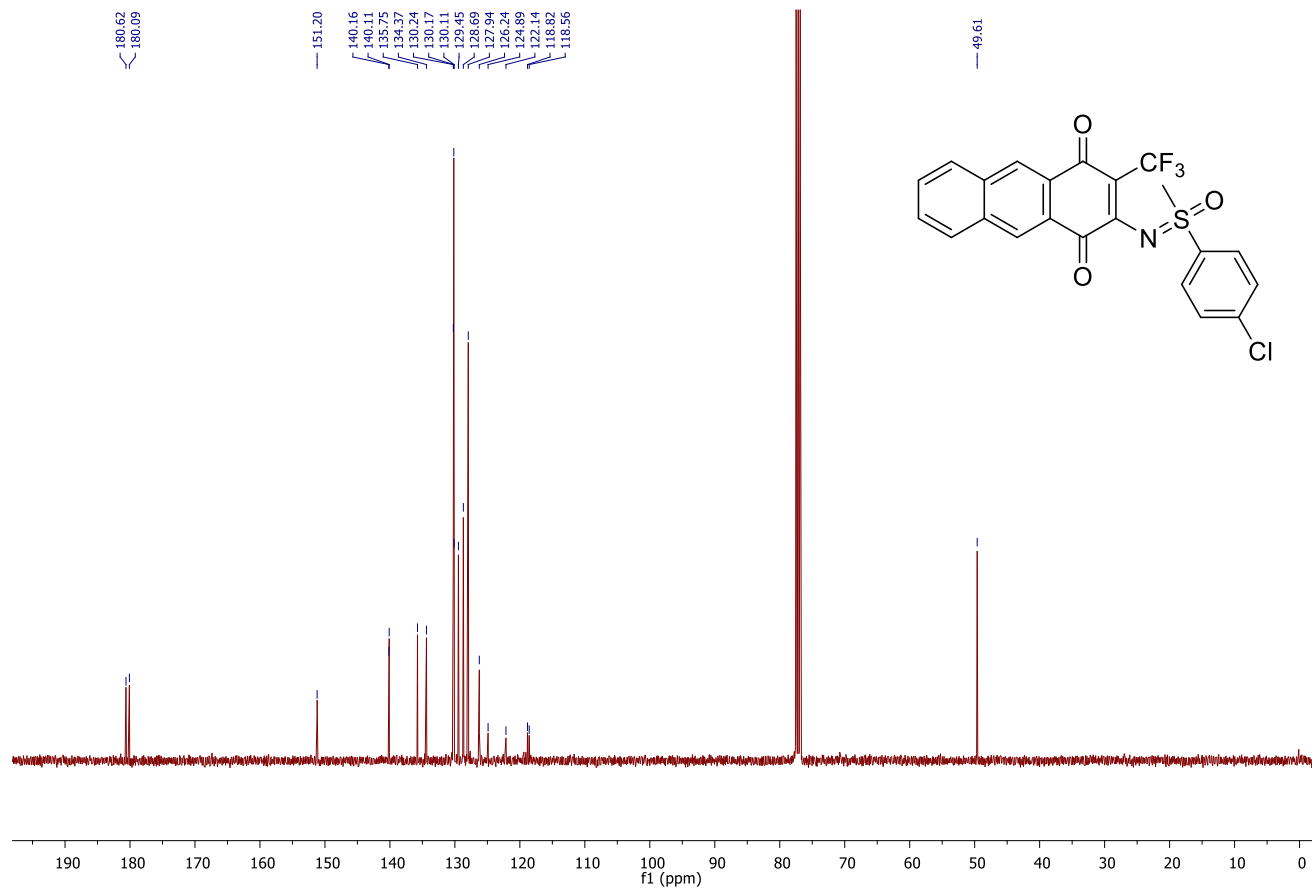

# HRMS of 5k

## Elemental Composition Report

### Single Mass Analysis

Tolerance = 50.0 PPM / DBE: min = -1.5, max = 50.0

Element prediction: Off

Number of isotope peaks used for i-FIT = 3

Monoisotopic Mass, Even Electron Ions

127 formula(e) evaluated with 1 results within limits (up to 3 closest results for each mass)

Elements Used:

C: 0-22 H: 0-45 N: 0-1 O: 0-3 F: 0-3 S: 0-1 Cl: 0-1

AQS-2-CF3

QMI DIVISION, CSIR-IIIM JAMMU  
Xevo G2-XS QTOF YFC2015

100723\_02 8 (0.172)

Page 1

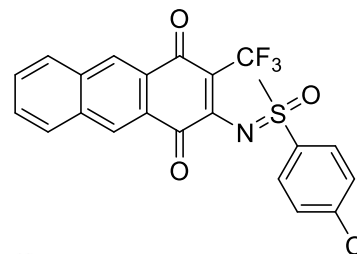

10-Jul-2023  
12:26:54  
1: TOF MS ES+  
1.47e+007

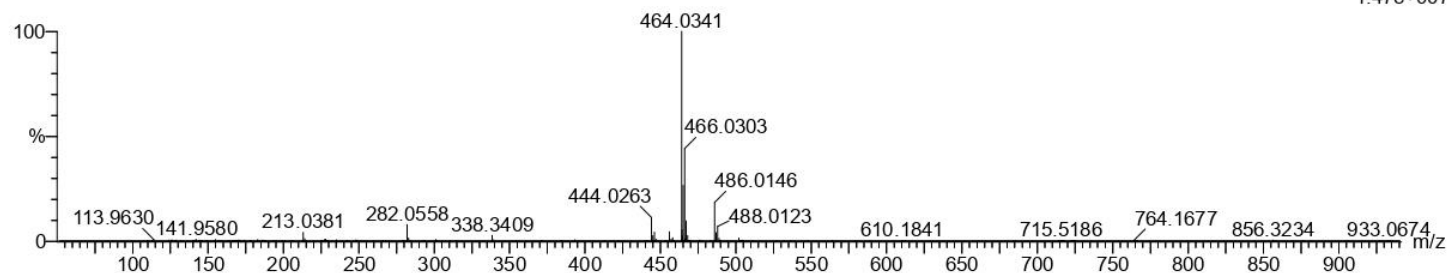

Minimum: -1.5  
Maximum: 2.0 50.0 50.0

| Mass     | Calc. Mass | mDa | PPM | DBE  | i-FIT | Norm | Conf(%) | Formula              |
|----------|------------|-----|-----|------|-------|------|---------|----------------------|
| 464.0341 | 464.0335   | 0.6 | 1.3 | 14.5 | 844.4 | n/a  | n/a     | C22 H14 N O3 F3 S Cl |

# $^1\text{H}$ NMR (400 MHz) of 5l in $\text{CDCl}_3$

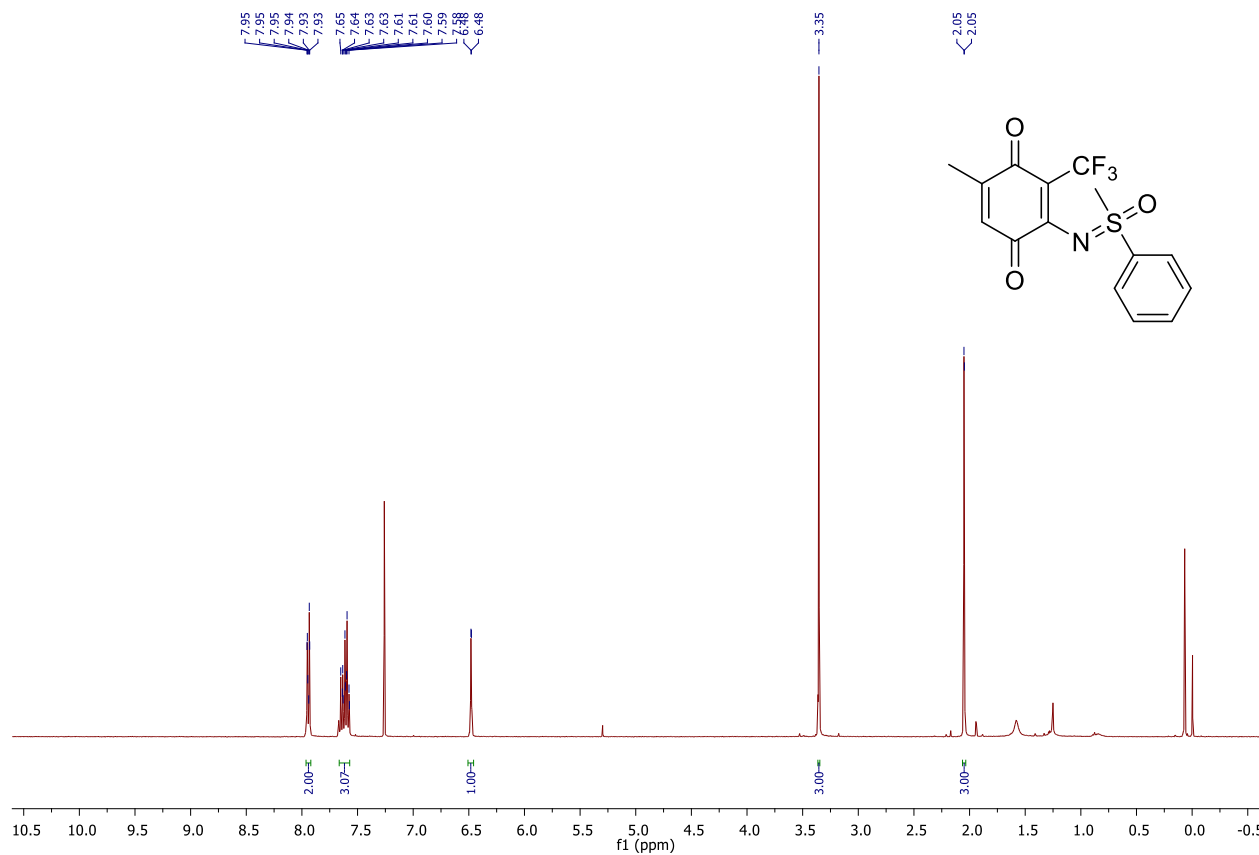

**$^{19}\text{F}$  NMR (377 MHz) of 5l in  $\text{CDCl}_3$**

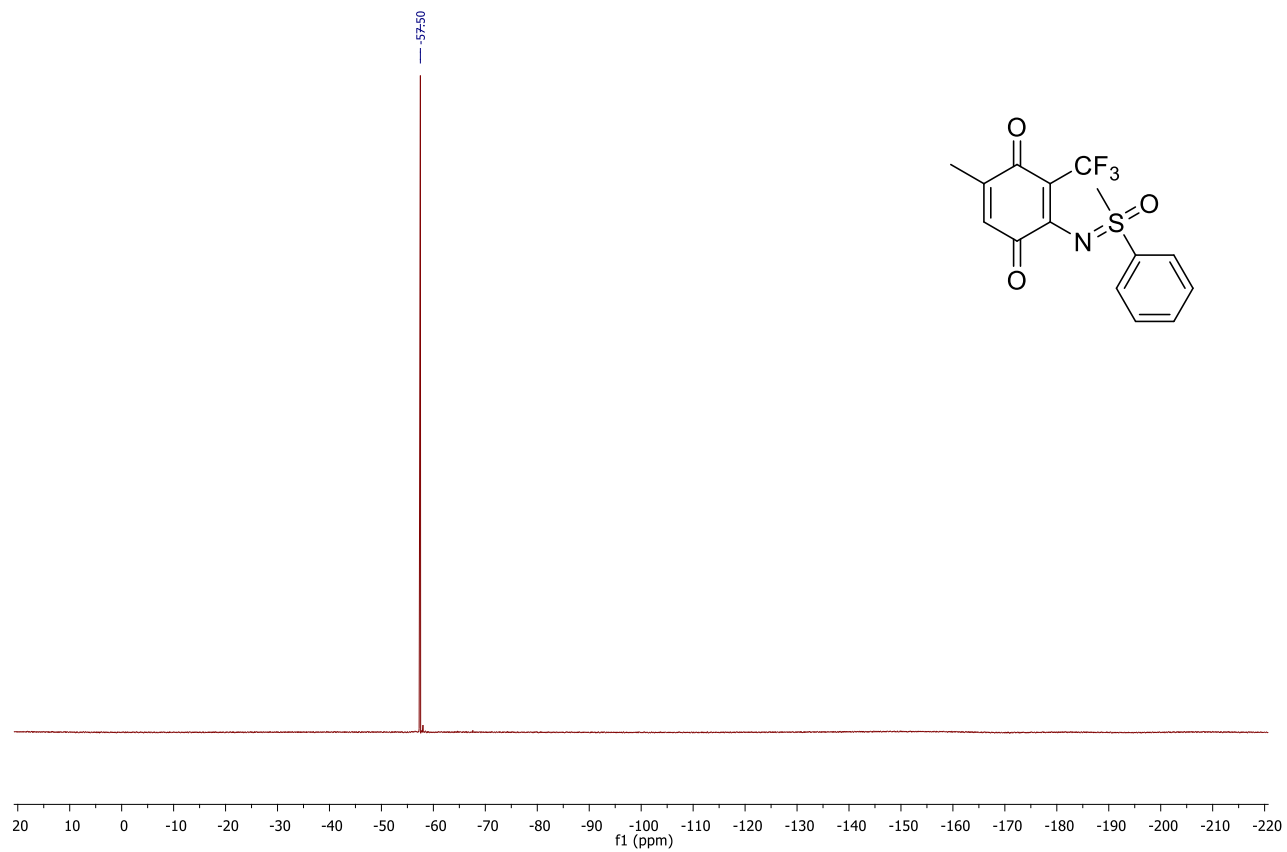



# $^{13}\text{C}$ $\{^1\text{H}\}$ NMR (101 MHz) of 5l in $\text{CDCl}_3$

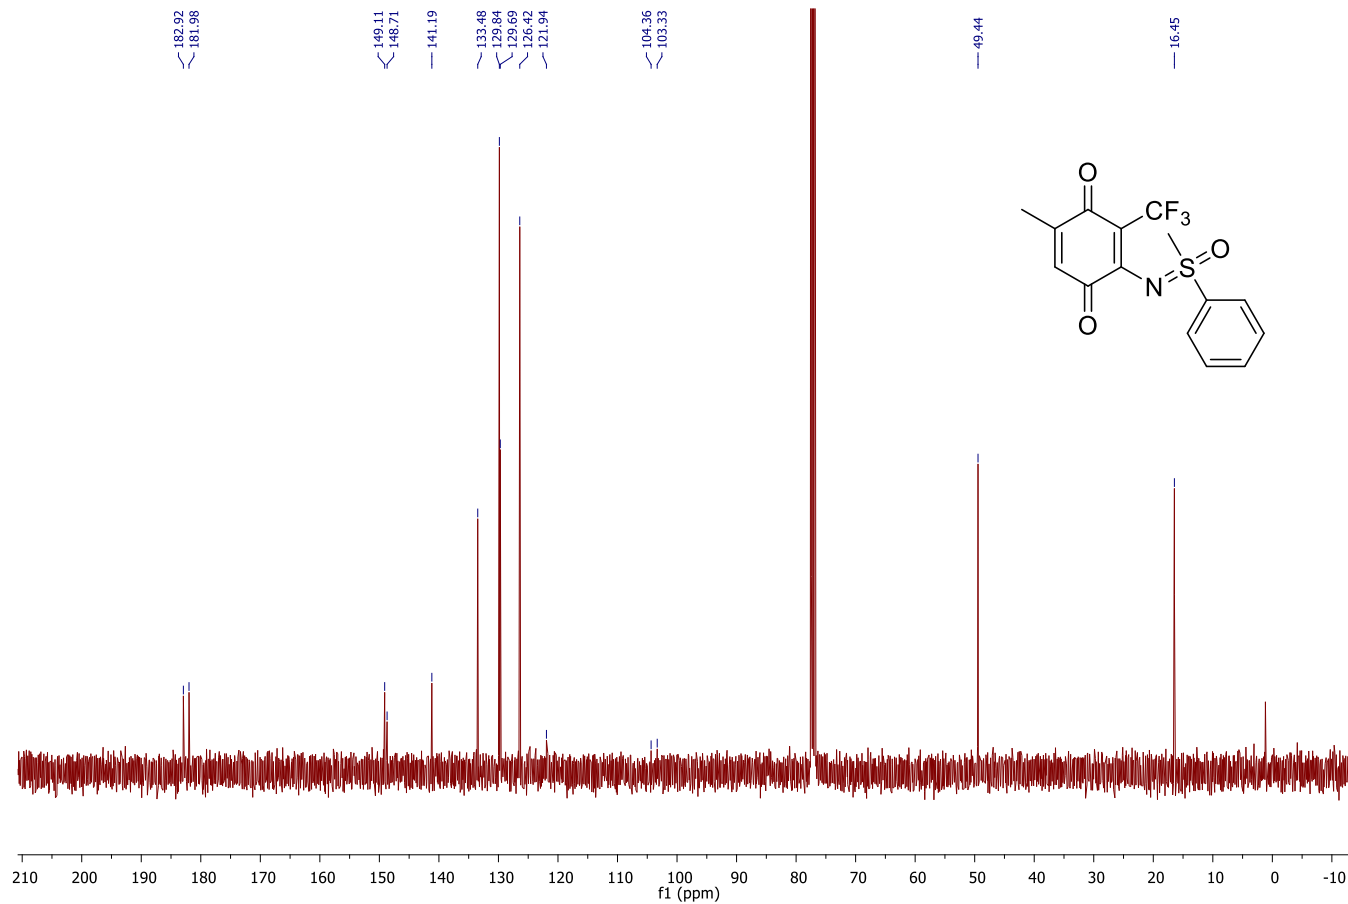

# HRMS of 5l

## Elemental Composition Report

Page 1

### Single Mass Analysis

Tolerance = 50.0 PPM / DBE: min = -1.5, max = 50.0

Element prediction: Off

Number of isotope peaks used for i-FIT = 3

Monoisotopic Mass, Even Electron Ions

65 formula(e) evaluated with 1 results within limits (up to 3 closest results for each mass)

Elements Used:

C: 0-15 H: 0-100 N: 0-1 O: 0-3 S: 0-1 F: 0-3

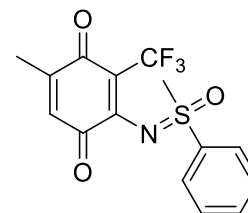

Me-BQ

QMI DIVISION, CSIR-IIIM JAMMU  
Xevo G2-XS QTOF YFC2015

08-Aug-2023

11:30:11

1: TOF MS ES+

2.88e+003

080823\_04 4 (0.104)

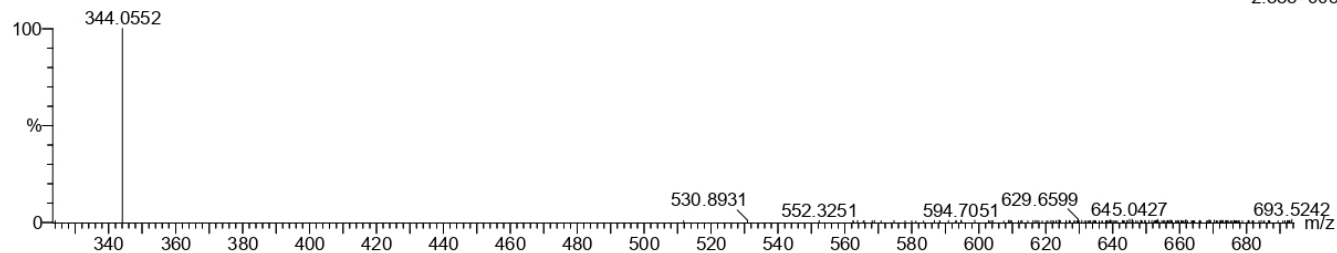

Minimum: -1.5  
Maximum: 2.0 50.0 50.0

| Mass     | Calc. Mass | mDa  | PPM  | DBE | i-FIT | Norm | Conf (%) | Formula           |
|----------|------------|------|------|-----|-------|------|----------|-------------------|
| 344.0552 | 344.0568   | -1.6 | -4.7 | 8.5 | 26.2  | n/a  | n/a      | C15 H13 N O3 S F3 |

# $^1\text{H}$ NMR (400 MHz) of 5m in $\text{CDCl}_3$

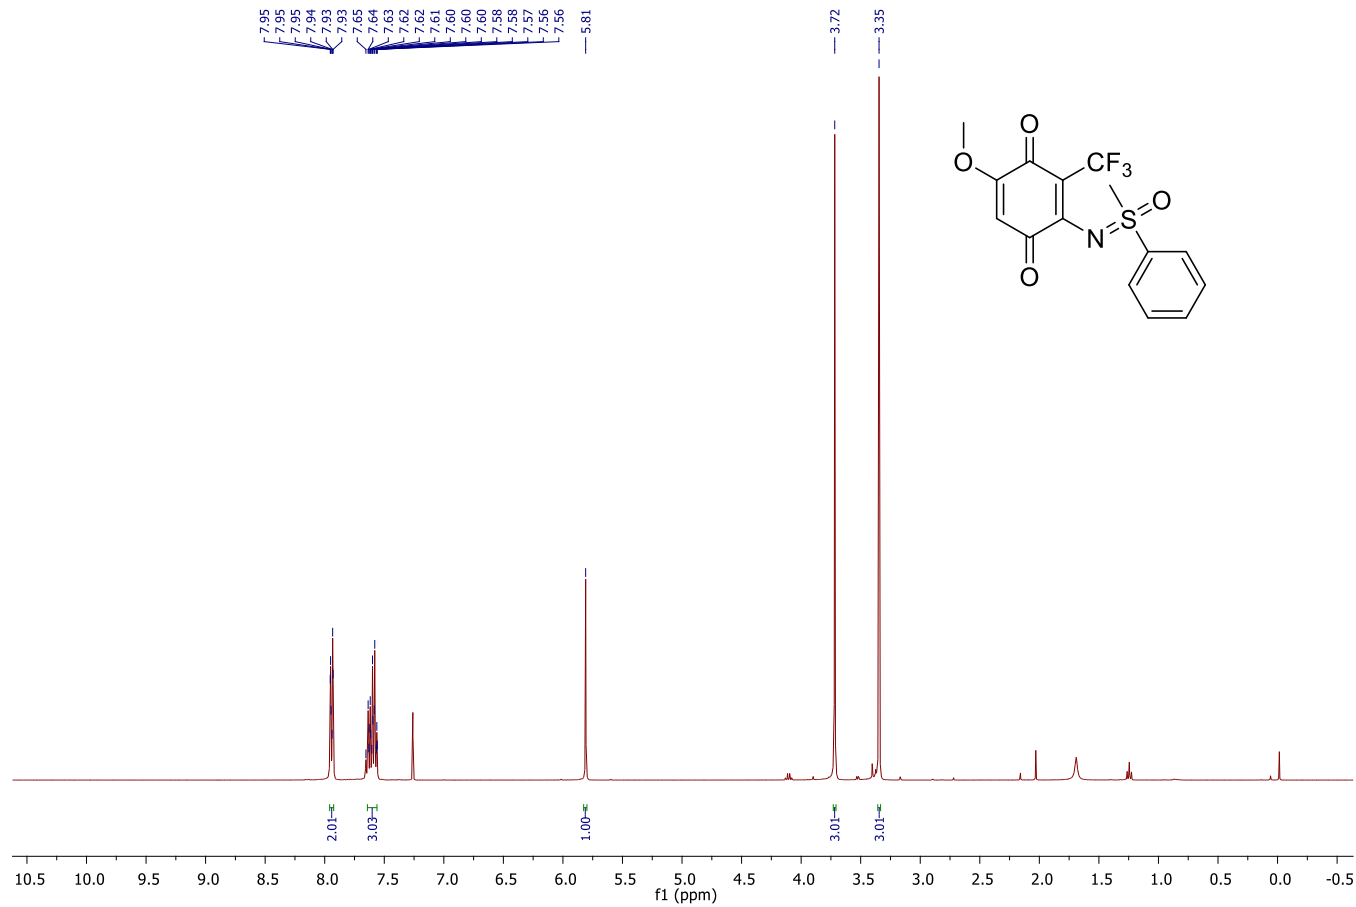

**$^{19}\text{F}$  NMR (377 MHz) of 5m in  $\text{CDCl}_3$**

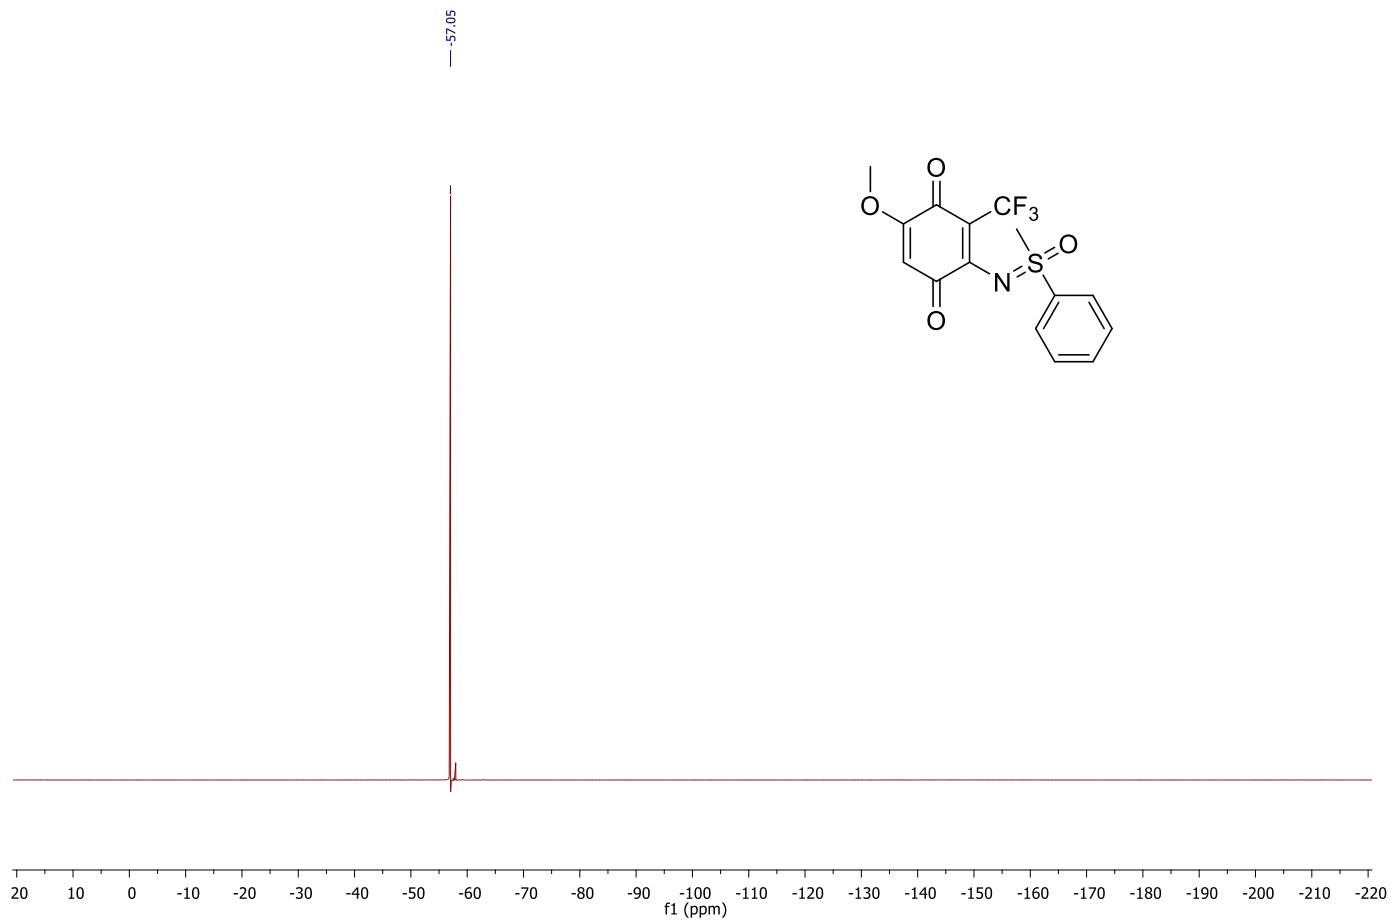

# $^{13}\text{C}$ $\{^1\text{H}\}$ NMR (101 MHz) of 5m in $\text{CDCl}_3$

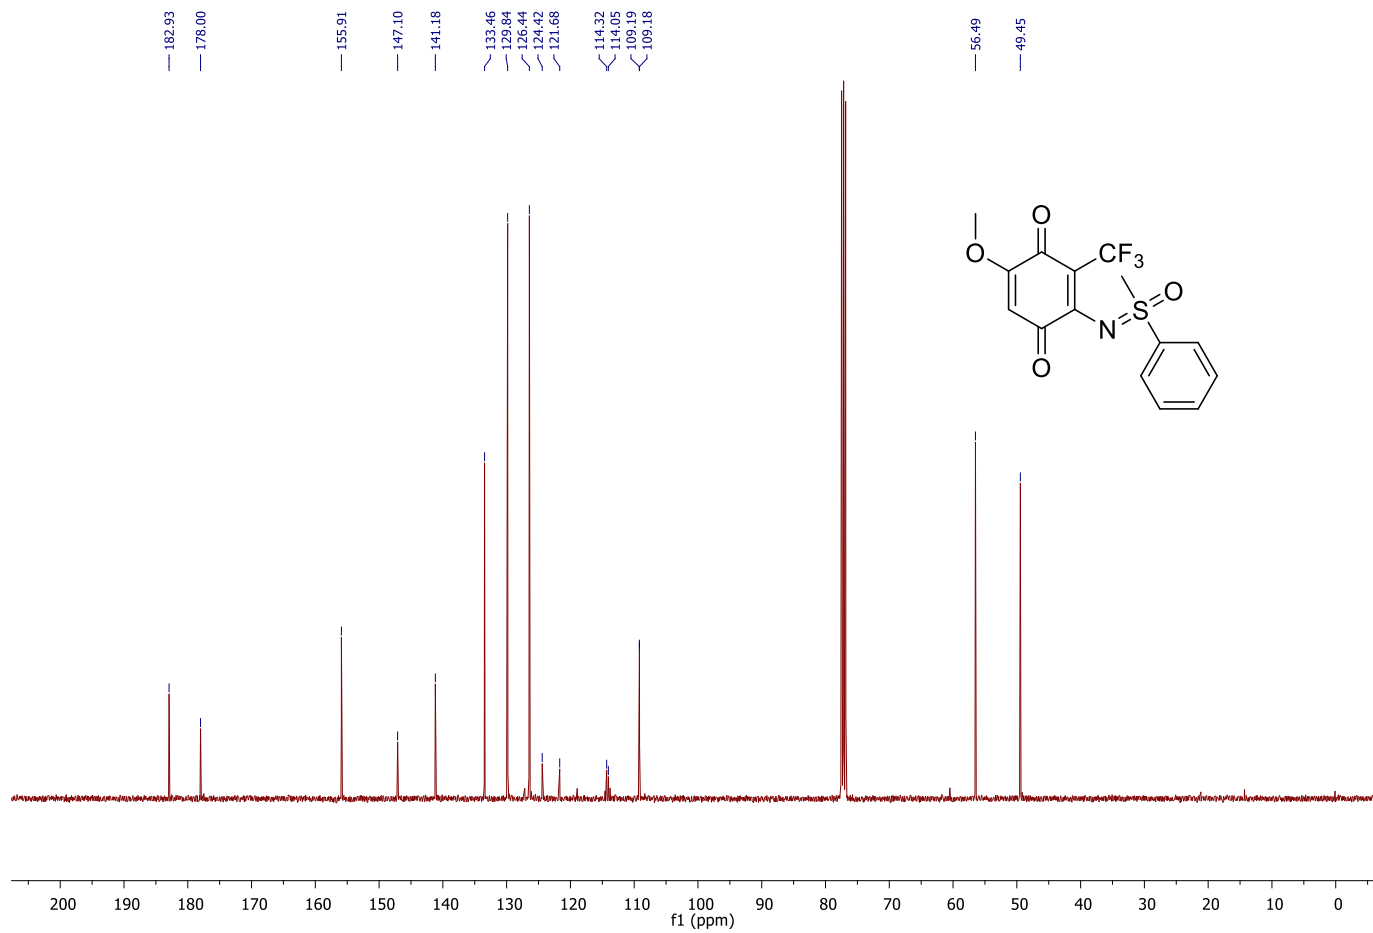

# HRMS of 5m

## Elemental Composition Report

### Single Mass Analysis

Tolerance = 50.0 PPM / DBE: min = -1.5, max = 50.0

Element prediction: Off

Number of isotope peaks used for i-FIT = 3

Monoisotopic Mass, Even Electron Ions

81 formula(e) evaluated with 1 results within limits (up to 3 closest results for each mass)

Elements Used:

C: 0-15 H: 0-100 N: 0-1 O: 0-4 F: 0-3 S: 0-1

OMe-BQ

QMI DIVISION, CSIR-IIIM JAMMU  
Xevo G2-XS QTOF YFC2015

080823\_02 6 (0.138)

09-Aug-2023  
16:55:49  
1: TOF MS ES+  
4.40e+006

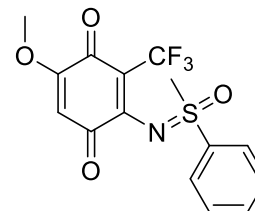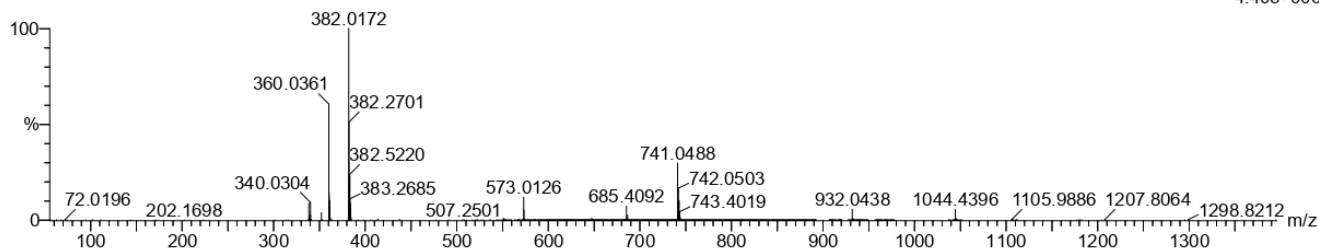

Minimum: -1.5  
Maximum: 2.0 50.0 50.0

| Mass     | Calc. Mass | mDa   | PPM   | DBE | i-FIT | Norm | Conf (%) | Formula           |
|----------|------------|-------|-------|-----|-------|------|----------|-------------------|
| 360.0361 | 360.0517   | -15.6 | -43.3 | 8.5 | 326.1 | n/a  | n/a      | C15 H13 N O4 F3 S |

# $^1\text{H}$ NMR (400 MHz) of 5n in $\text{CDCl}_3$

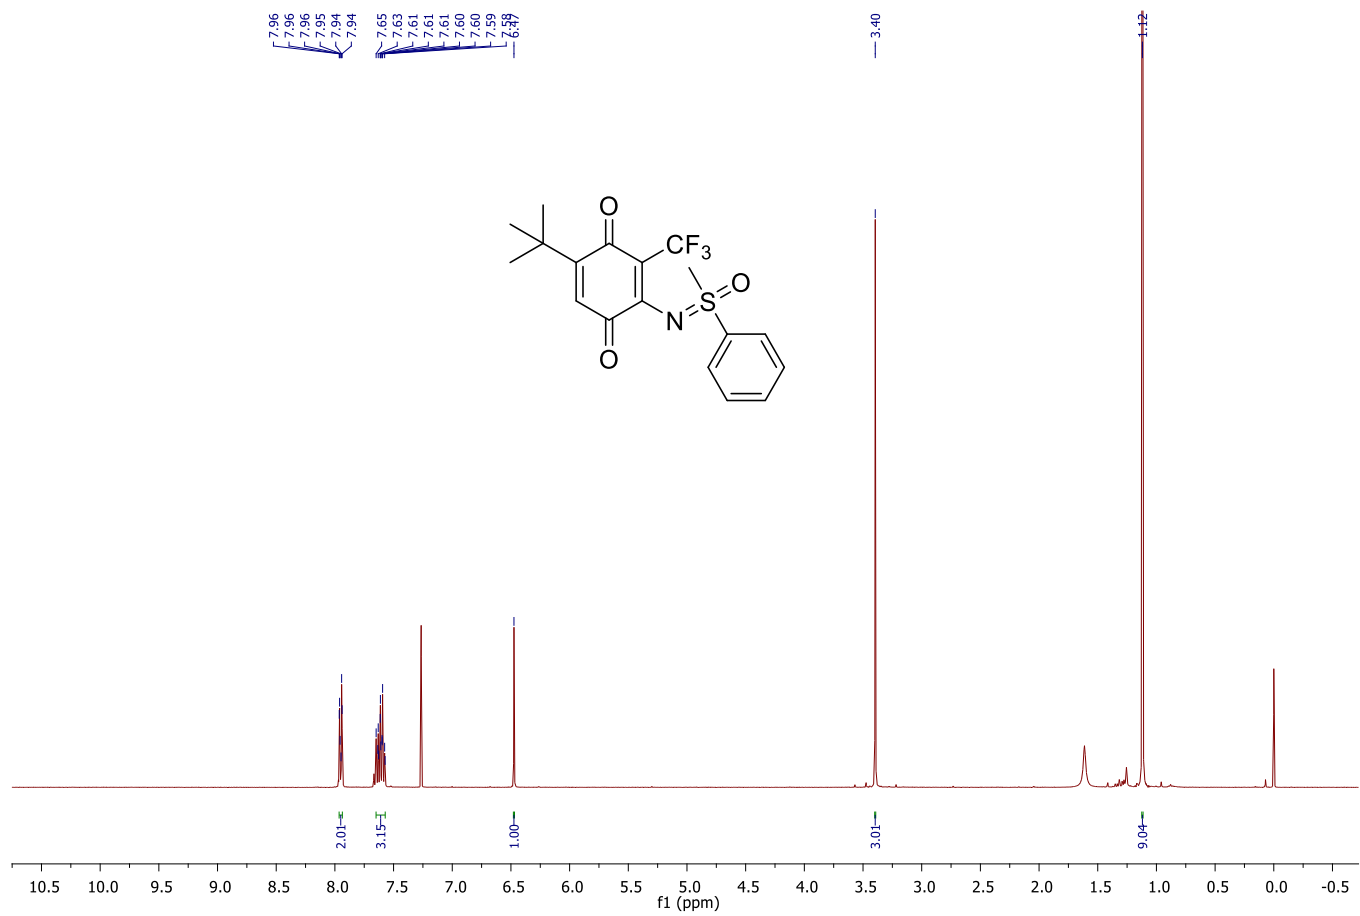

**$^{19}\text{F}$  NMR (377 MHz) of 5n in  $\text{CDCl}_3$**

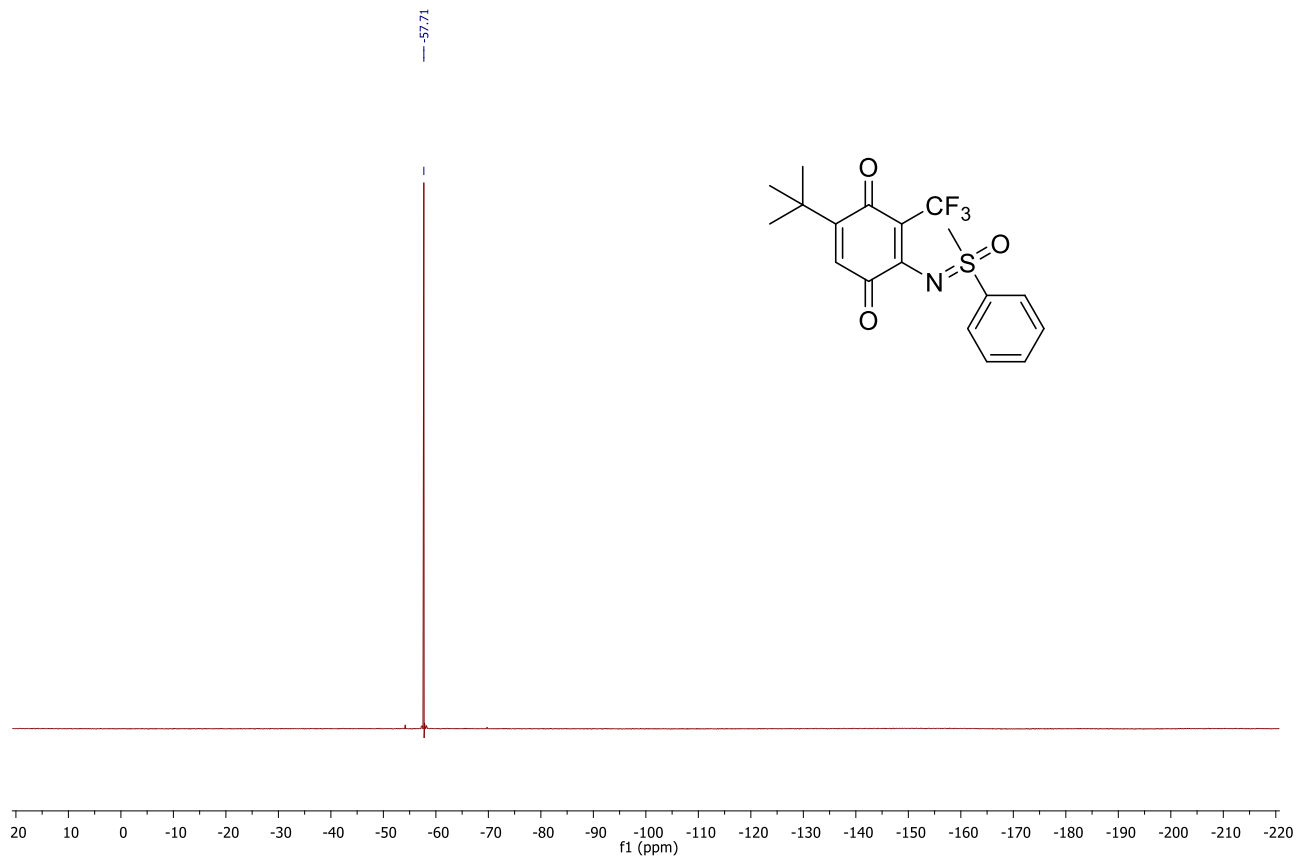



# $^{13}\text{C}$ $\{^1\text{H}\}$ NMR (101 MHz) of 5n in $\text{CDCl}_3$

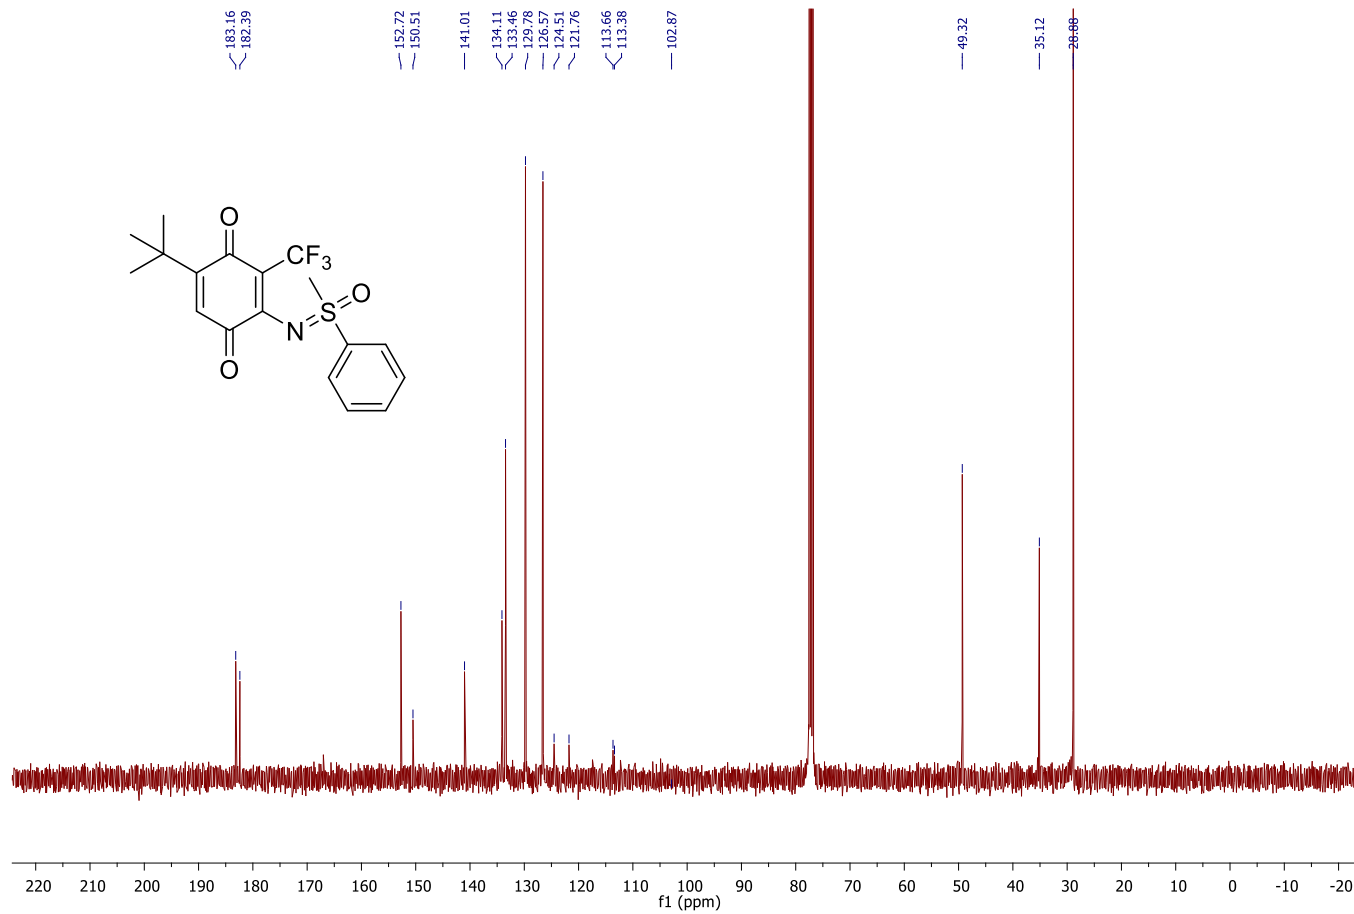

# HRMS of 5n

## Elemental Composition Report

### Single Mass Analysis

Tolerance = 50.0 PPM / DBE: min = -1.5, max = 50.0

Element prediction: Off

Number of isotope peaks used for i-FIT = 3

Monoisotopic Mass, Even Electron Ions

81 formula(e) evaluated with 1 results within limits (up to 3 closest results for each mass)

Elements Used:

C: 0-15 H: 0-100 N: 0-1 O: 0-4 F: 0-3 S: 0-1

OMe-BQ

QMI DIVISION, CSIR-IIIM JAMMU  
Xevo G2-XS QTOF YFC2015

Page 1

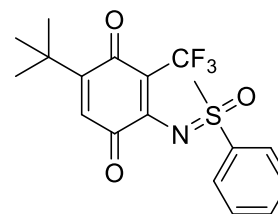

080823\_02 6 (0.138)

09-Aug-2023  
16:55:49  
1: TOF MS ES+  
4.40e+006

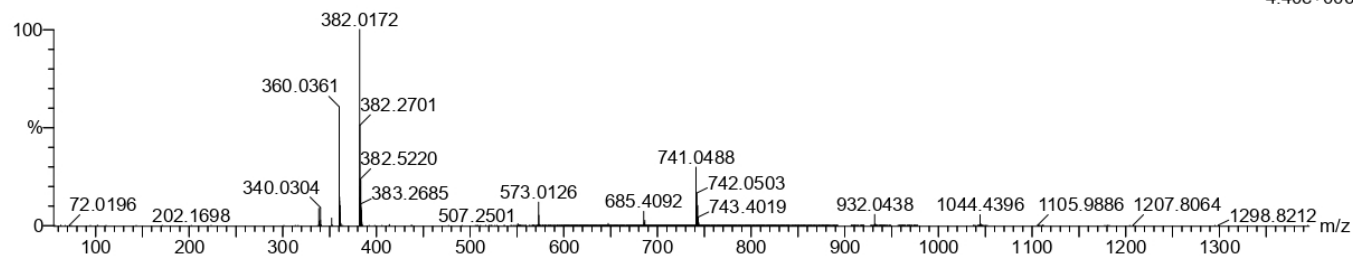

Minimum: -1.5  
Maximum: 2.0 50.0 50.0

| Mass     | Calc. Mass | mDa   | PPM   | DBE | i-FIT | Norm | Conf(%) | Formula           |
|----------|------------|-------|-------|-----|-------|------|---------|-------------------|
| 360.0361 | 360.0517   | -15.6 | -43.3 | 8.5 | 326.1 | n/a  | n/a     | C15 H13 N O4 F3 S |

# $^1\text{H}$ NMR (400 MHz) of 8a in $\text{CDCl}_3$

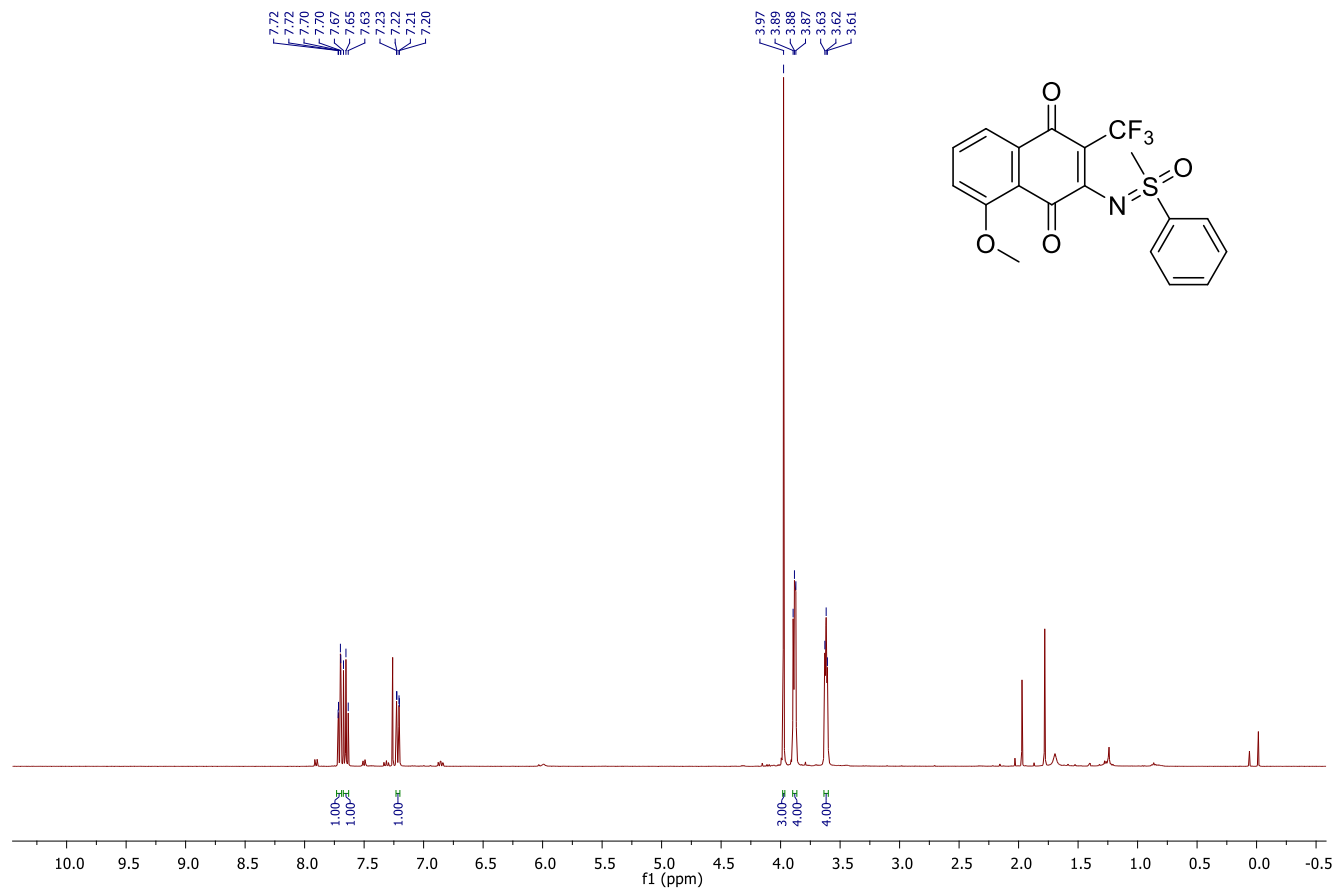

**$^{19}\text{F}$  NMR (377 MHz) of 8a in  $\text{CDCl}_3$**

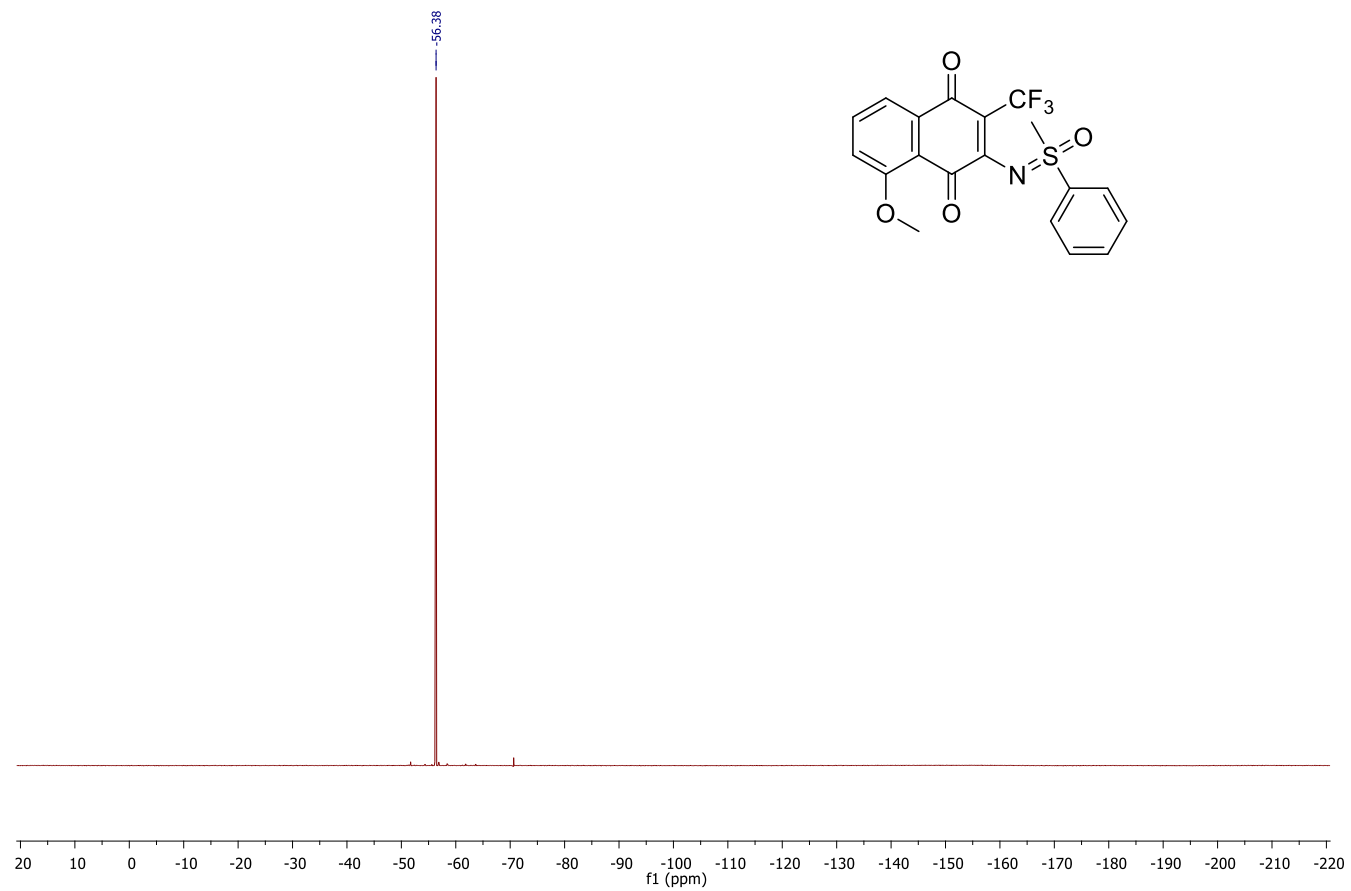

# $^{13}\text{C}$ $\{^1\text{H}\}$ NMR (101 MHz) of 8a in $\text{CDCl}_3$

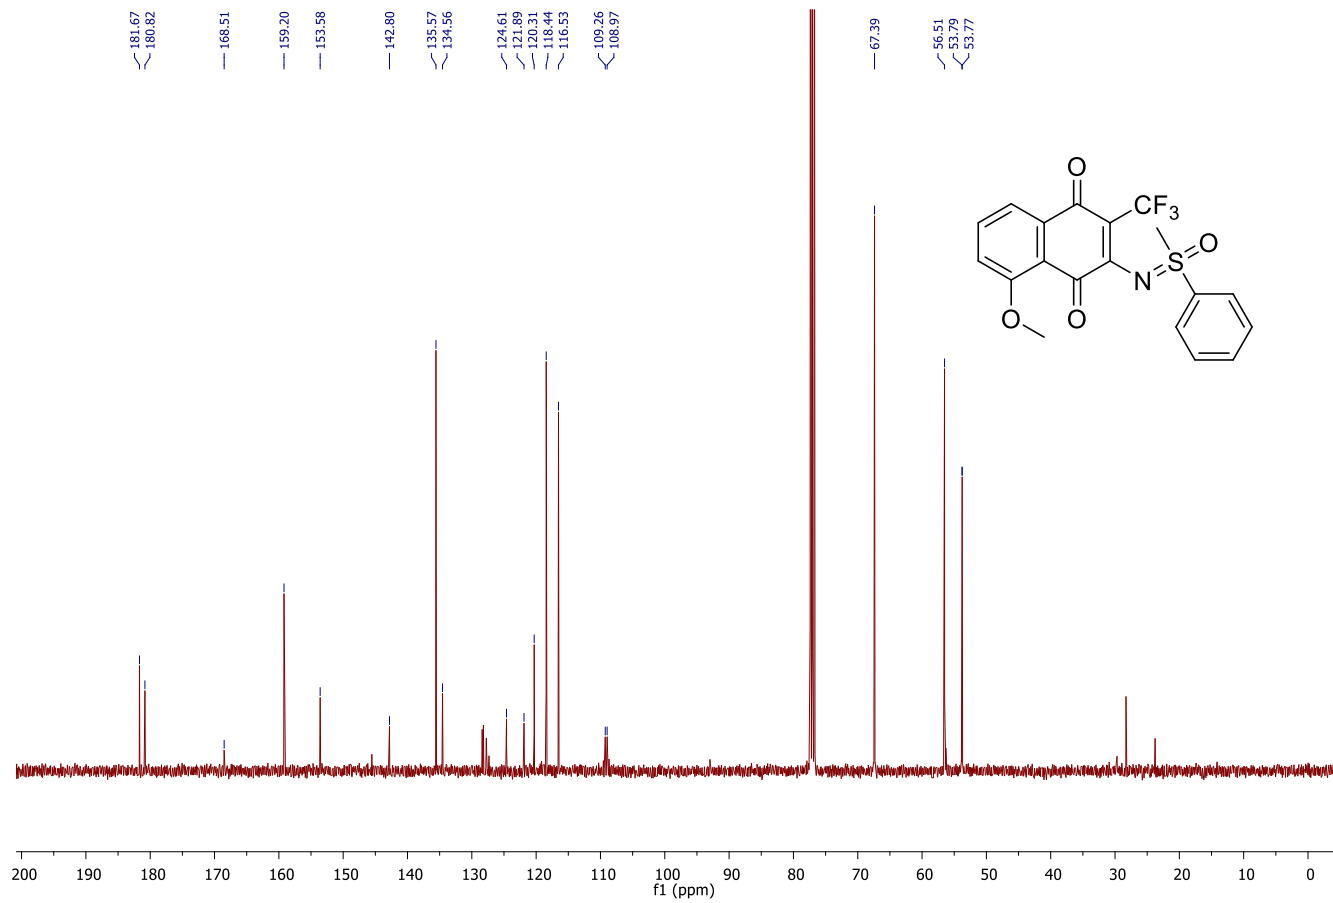

# COSY NMR of 8a in CDCl<sub>3</sub>

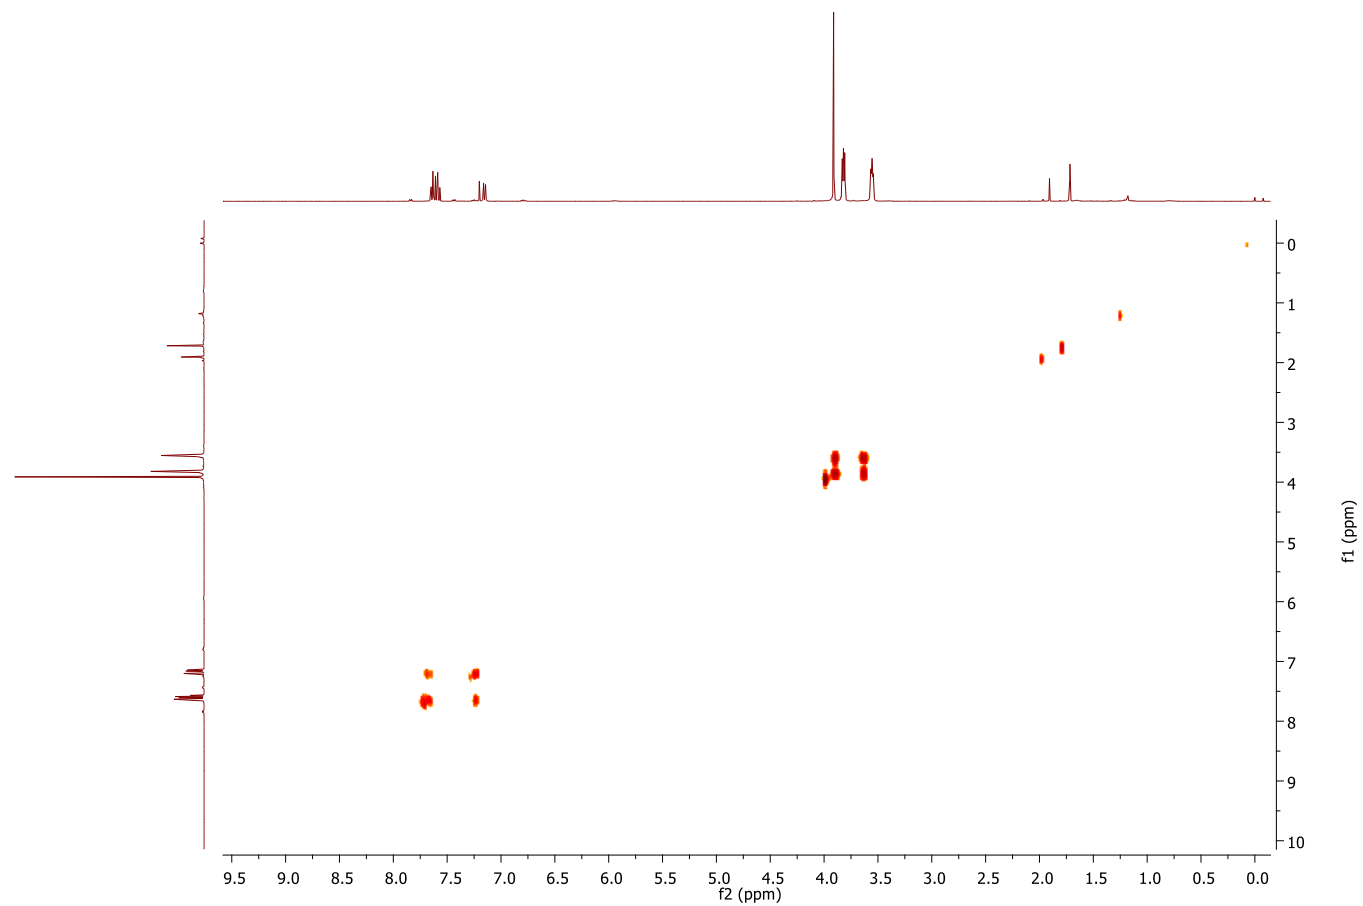

# HMBC NMR of 8a in CDCl<sub>3</sub>

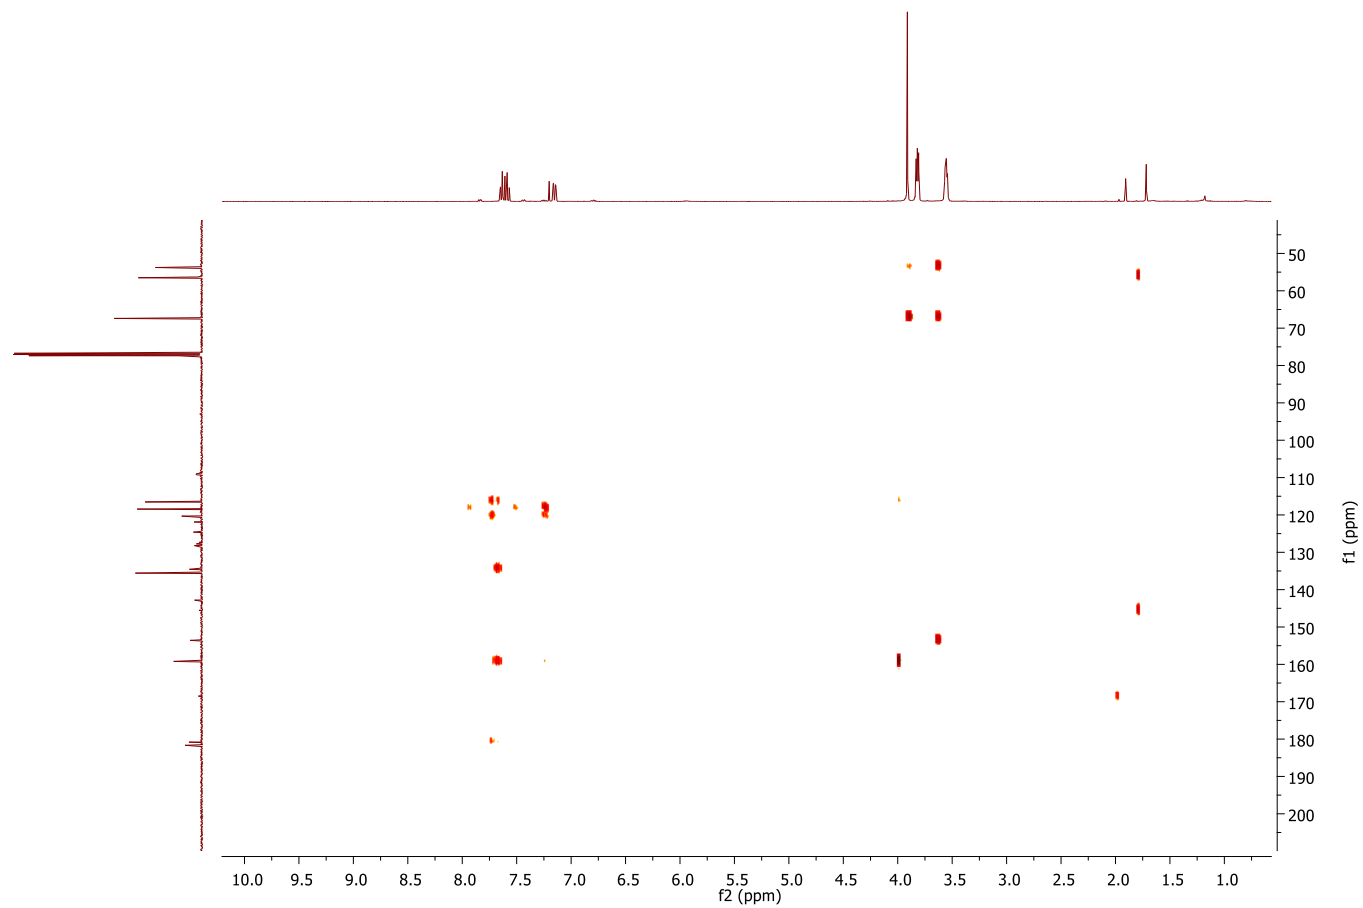

# HSQC NMR of 8a in CDCl<sub>3</sub>

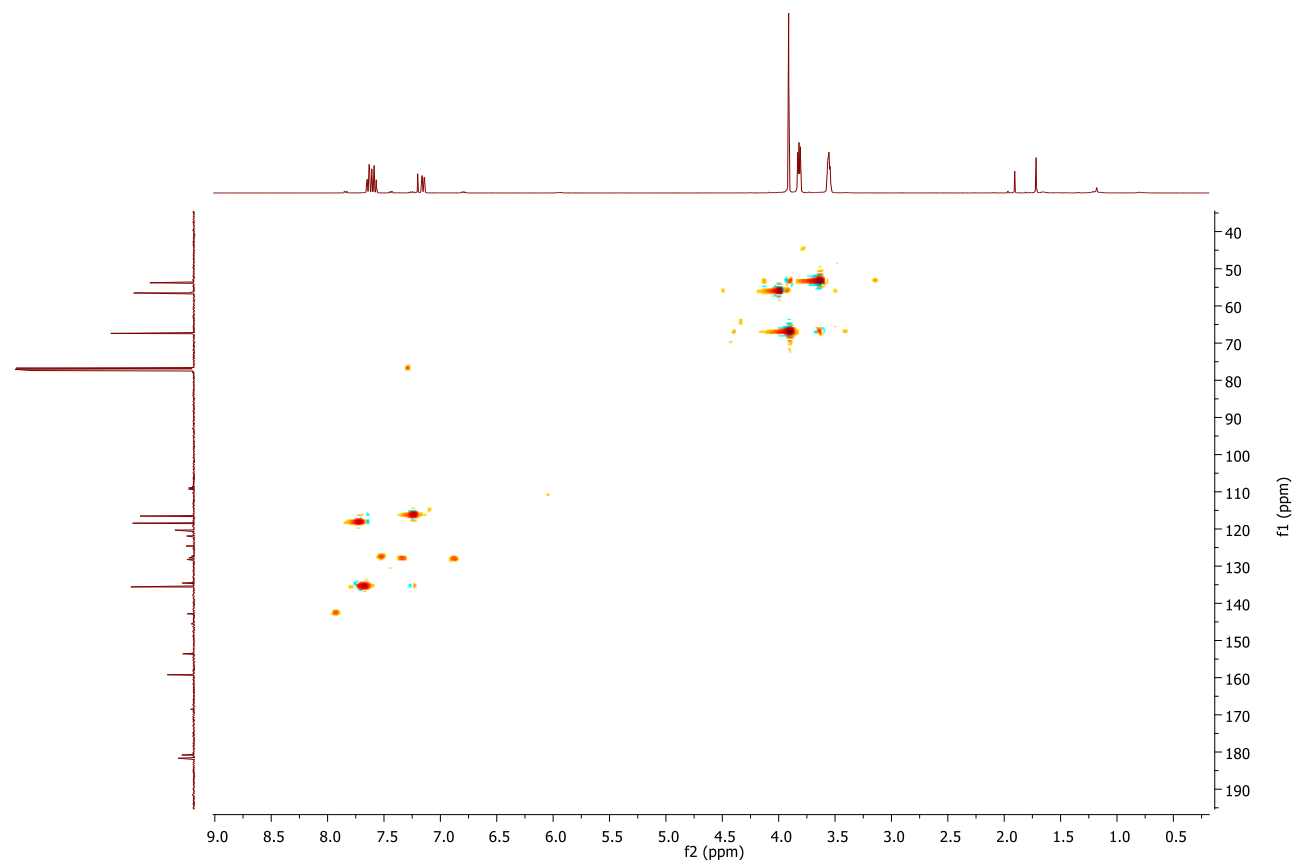



# NOESY NMR of 8a in CDCl<sub>3</sub>

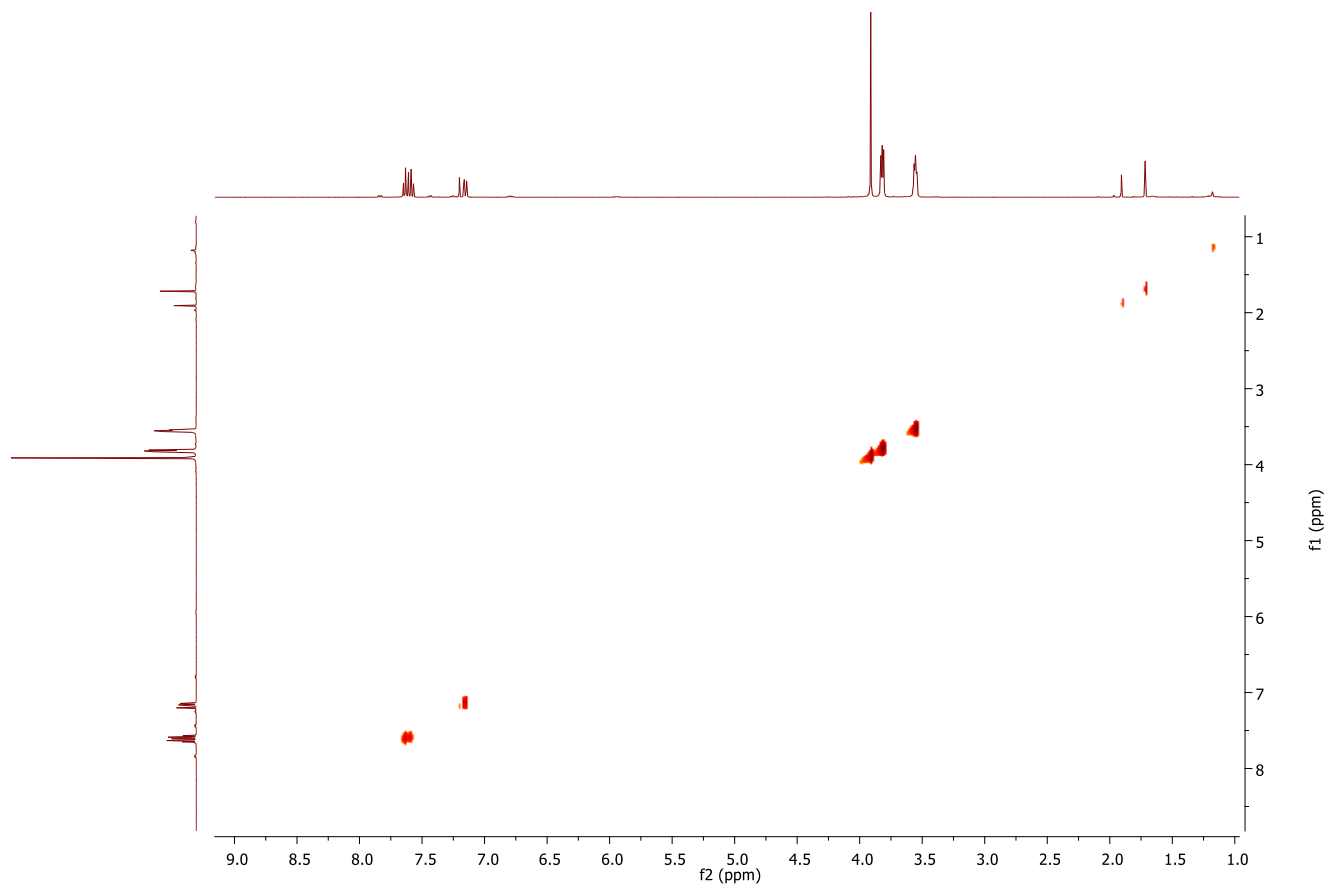

# HRMS of 8a

## Elemental Composition Report

### Single Mass Analysis

Tolerance = 50.0 PPM / DBE: min = -1.5, max = 50.0

Element prediction: Off

Number of isotope peaks used for i-FIT = 3

Monoisotopic Mass, Even Electron Ions

41 formula(e) evaluated with 1 results within limits (up to 3 closest results for each mass)

Elements Used:

C: 0-16 H: 0-100 N: 0-1 O: 0-4 F: 0-3

5-OMe NQ-MOR

100723\_03 6 (0.138)

QMI DIVISION, CSIR-IIIM JAMMU  
Xevo G2-XS QTOF YFC2015

10-Jul-2023  
12:29:37  
1: TOF MS ES+  
1.40e+007

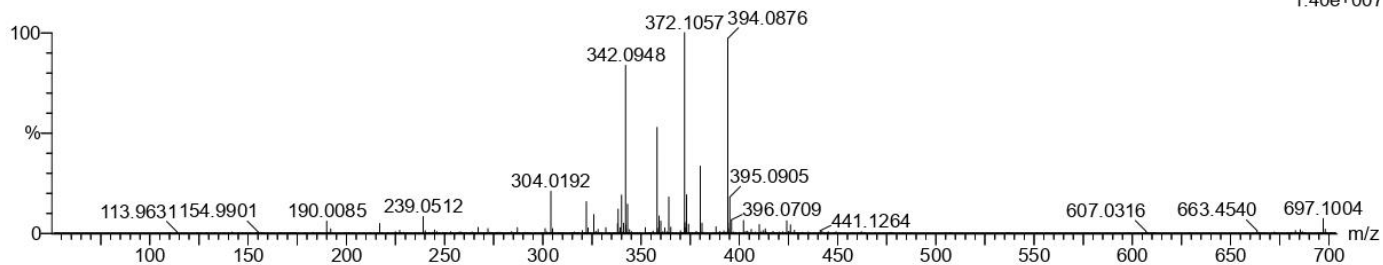

Minimum: -1.5  
Maximum: 2.0 50.0 50.0

| Mass     | Calc. Mass | mDa  | PPM  | DBE | i-FIT | Norm | Conf (%) | Formula         |
|----------|------------|------|------|-----|-------|------|----------|-----------------|
| 342.0948 | 342.0953   | -0.5 | -1.5 | 8.5 | 955.9 | n/a  | n/a      | C16 H15 N O4 F3 |

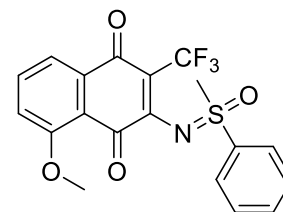

# $^1\text{H}$ NMR (400 MHz) of Togni-1 in $\text{CDCl}_3$

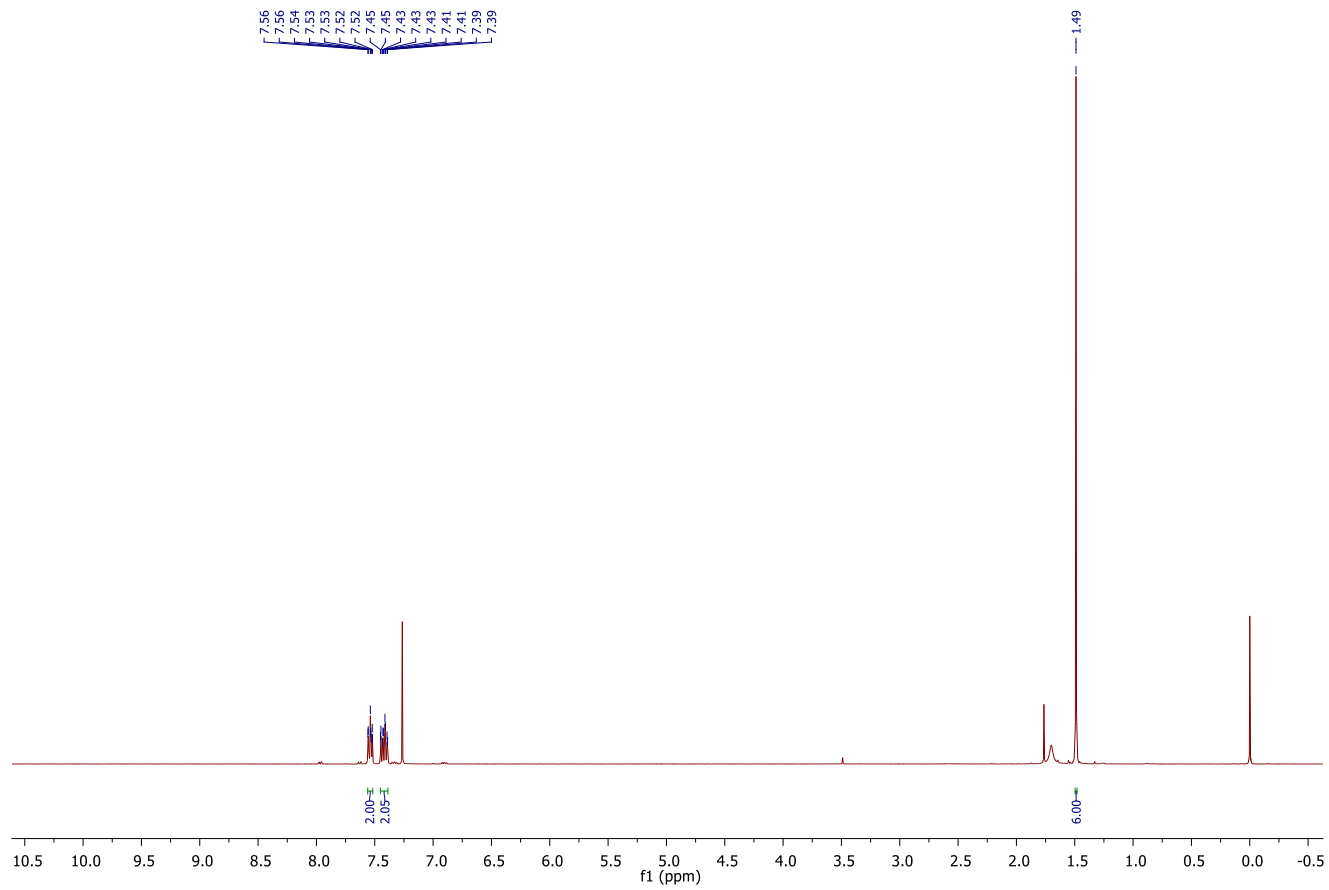

**$^{19}\text{F}$  NMR (377 MHz) of Togni-1 in  $\text{CDCl}_3$**

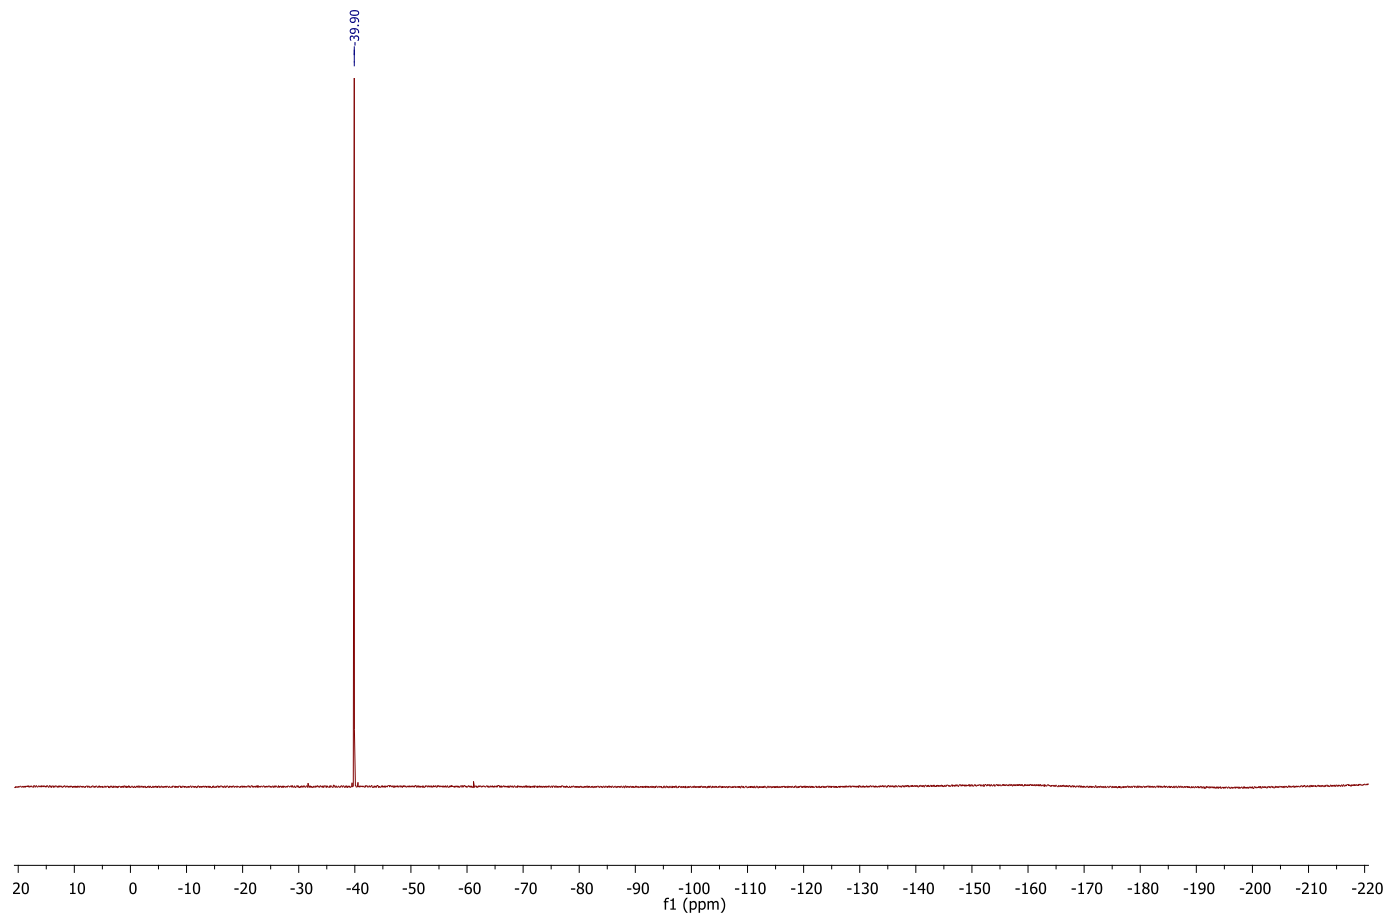

**$^1\text{H}$  NMR (400 MHz) of Togni-1 + Sulfoximine in  $\text{CDCl}_3$**

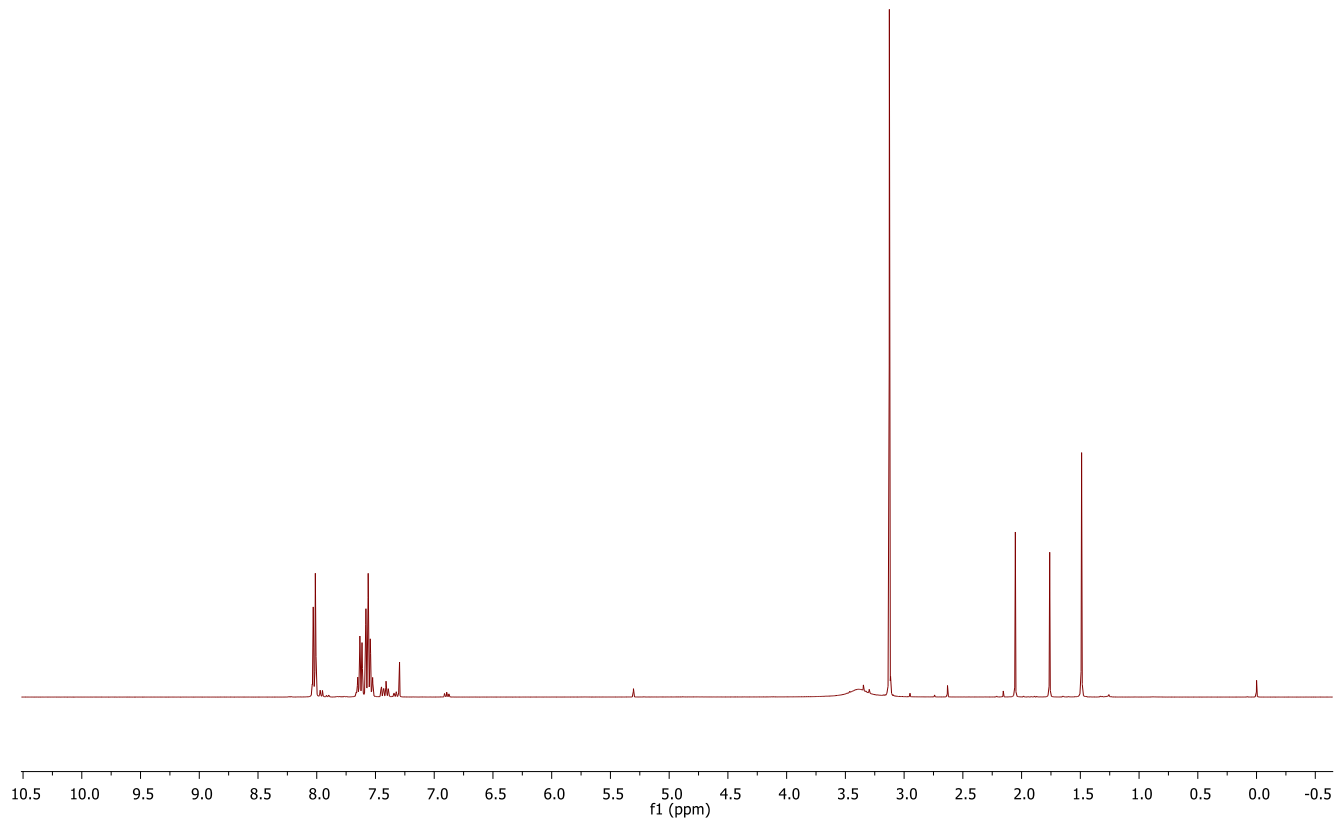

**$^{19}\text{F}$  NMR (377 MHz) of Togni-1 + Sulfoximine in  $\text{CDCl}_3$**

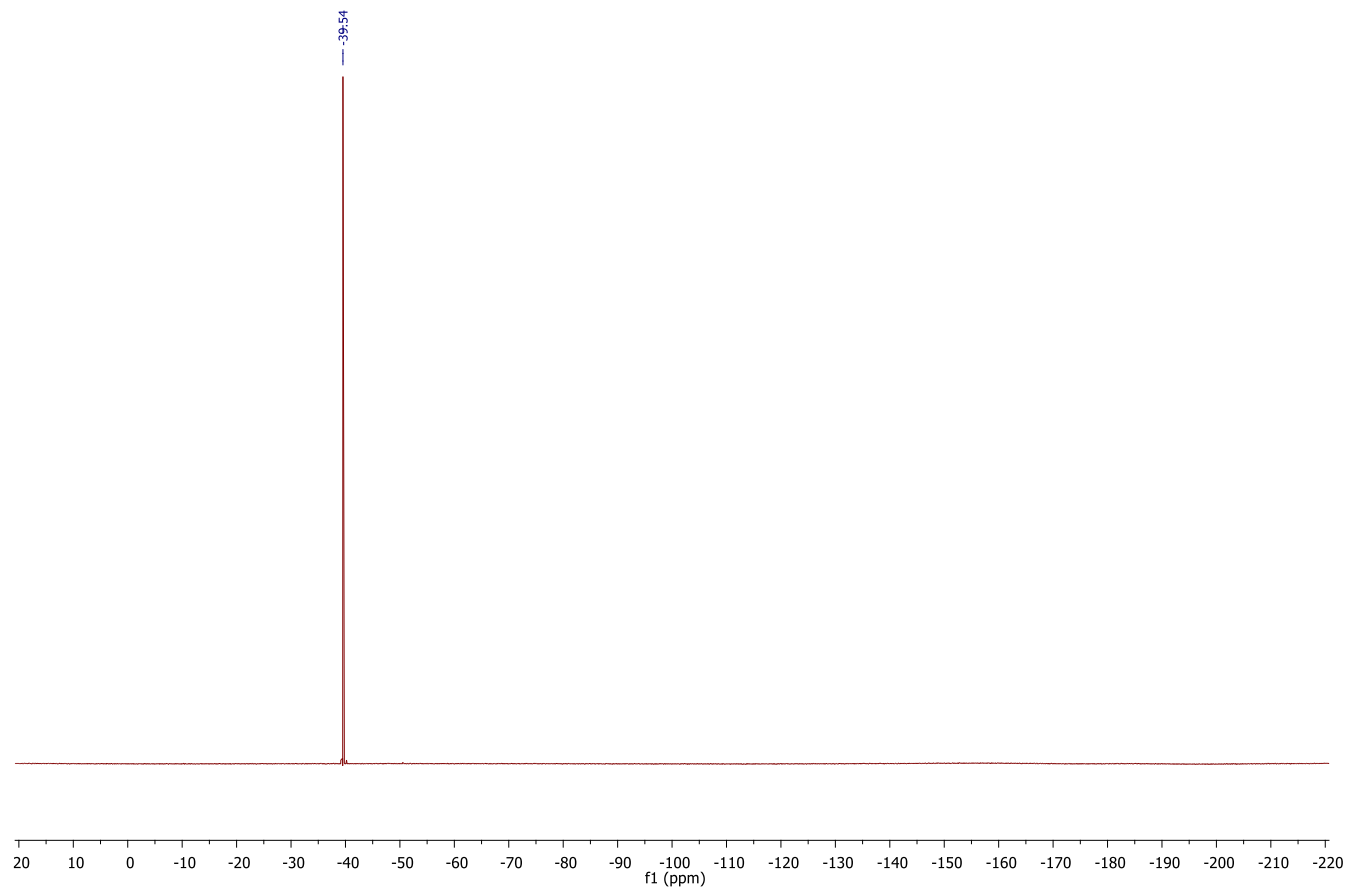

# $^{19}\text{F}$ NMR (377 MHz) of TEMPO- $\text{CF}_3$ adduct

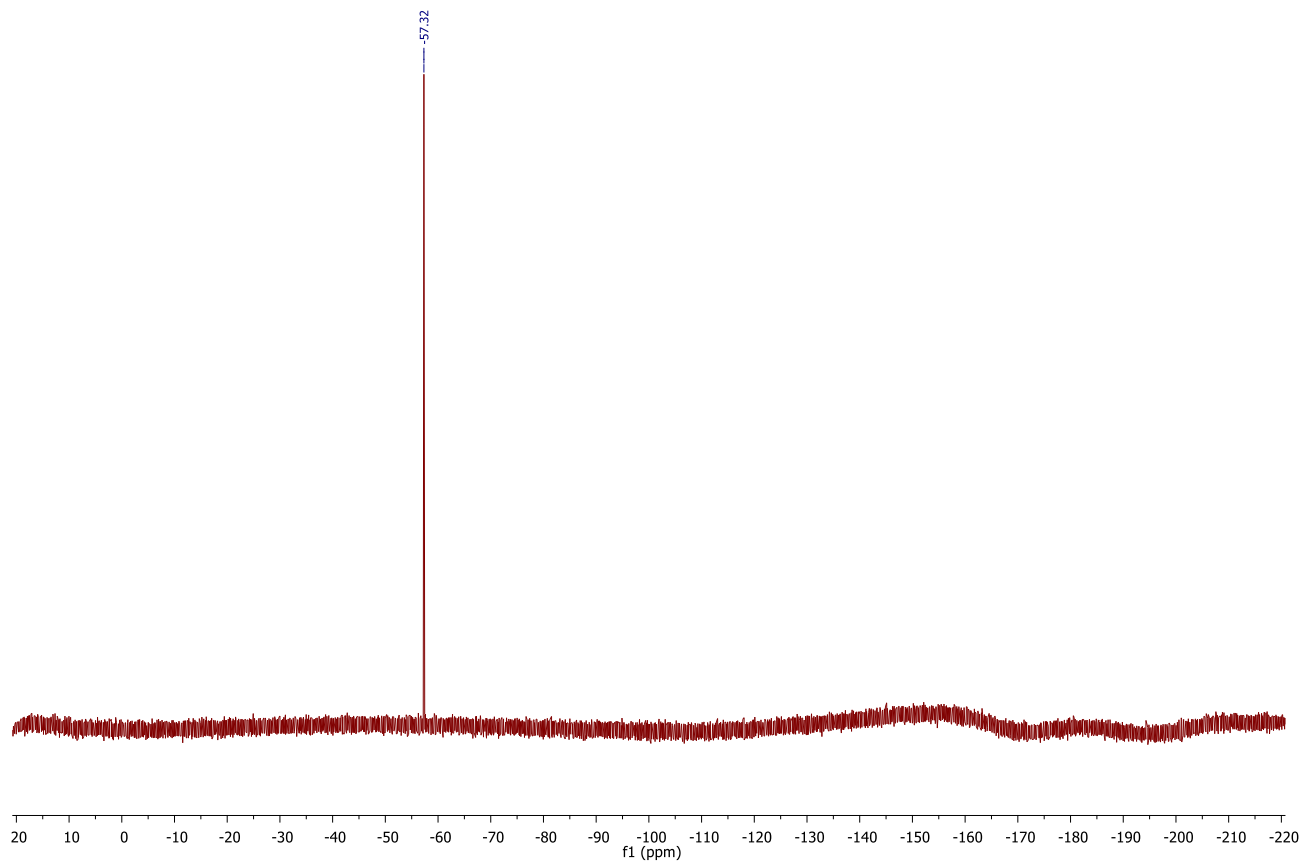

# XPS Spectra of Au(I)

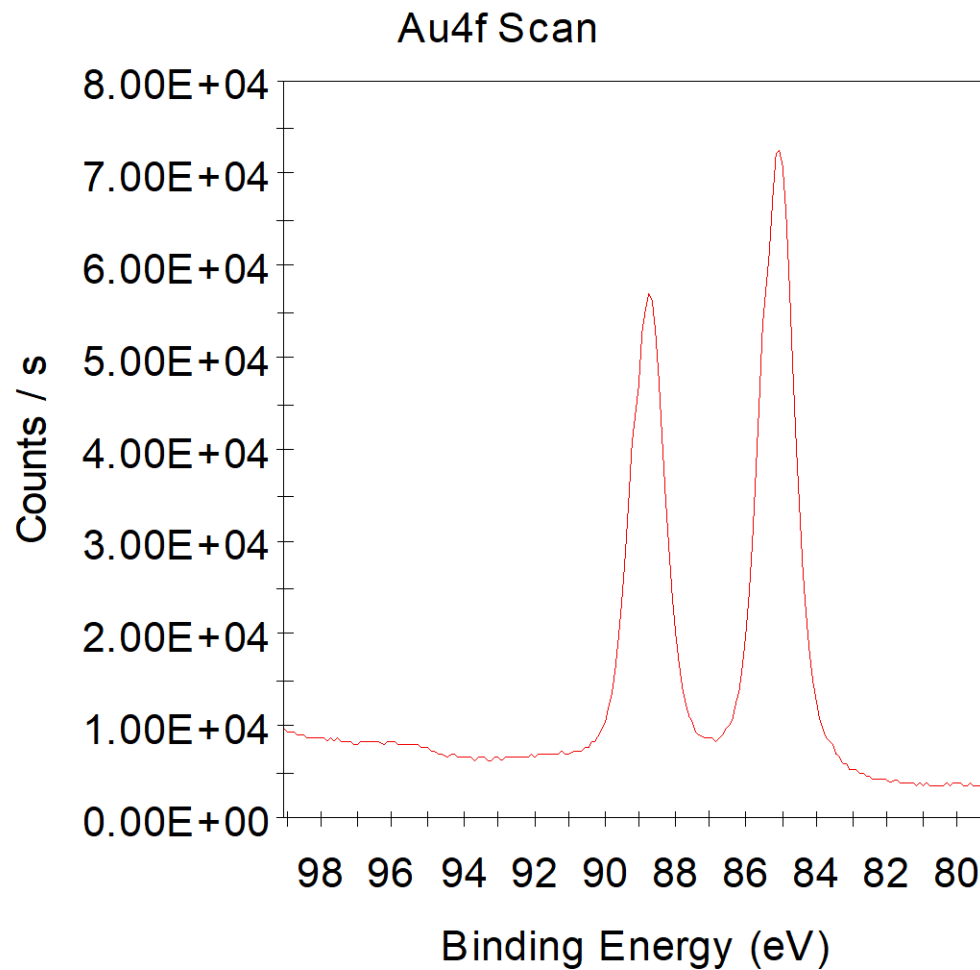



## XPS Spectra of NQ-1

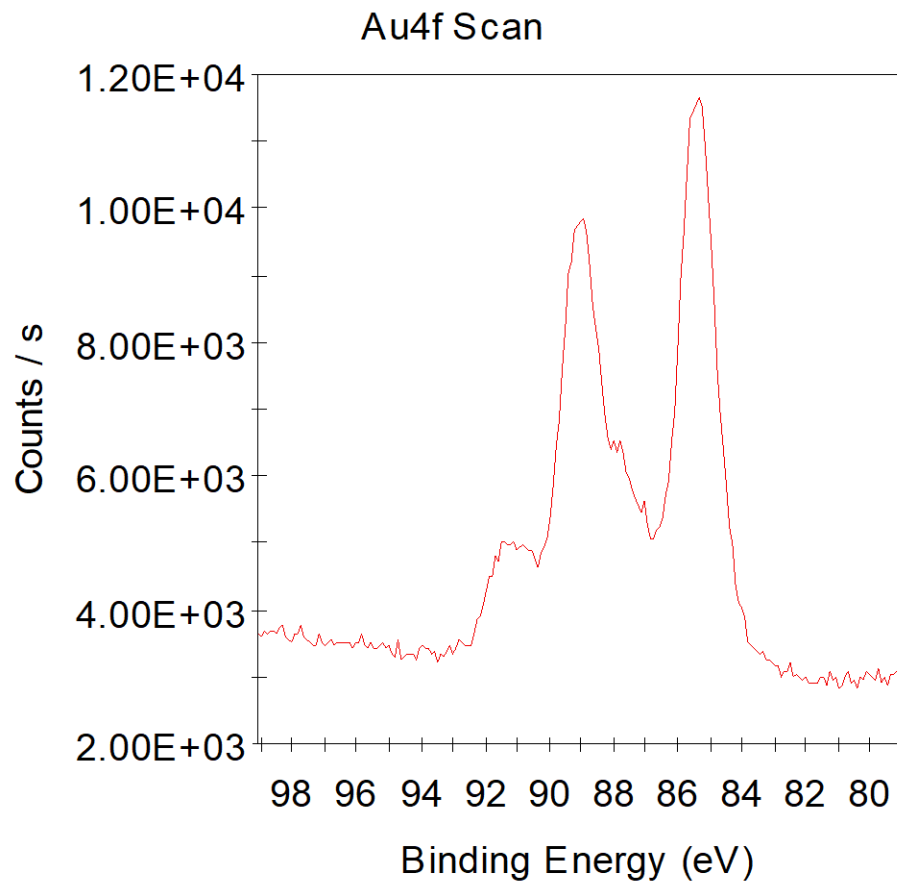

## XPS Spectra of NQ-2

Au4f Scan  
10 Scans, 1 m 40.5 s, 400 $\mu$ m, CAE 50.0  
0.10 eV

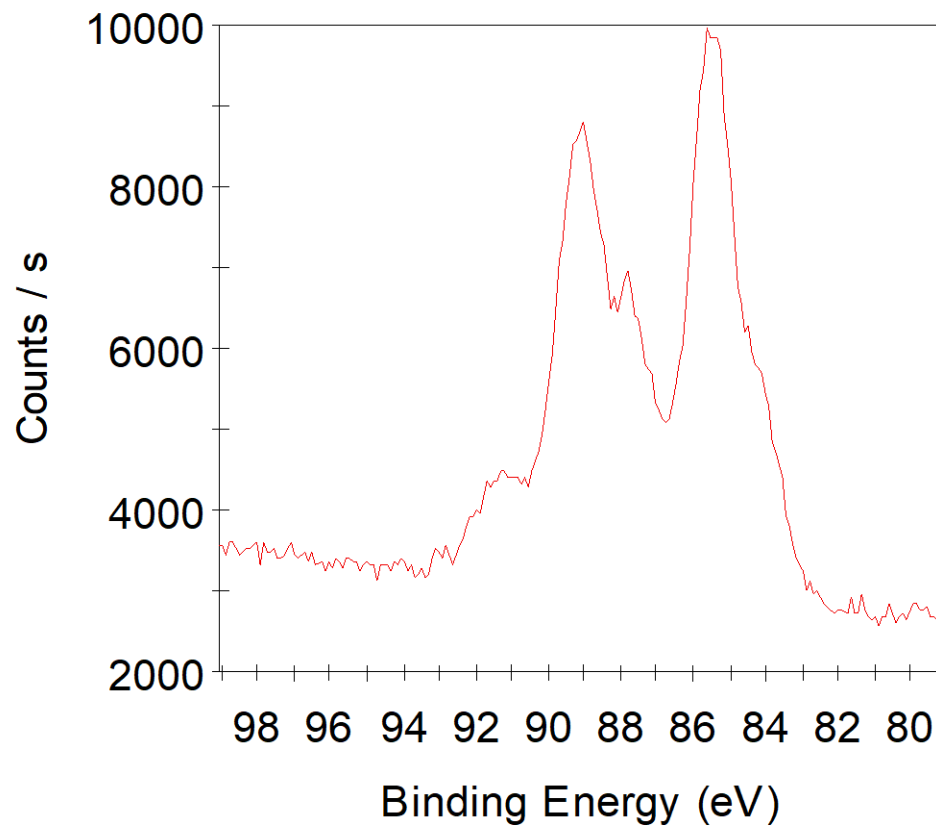

## XPS Spectra of Au(III)

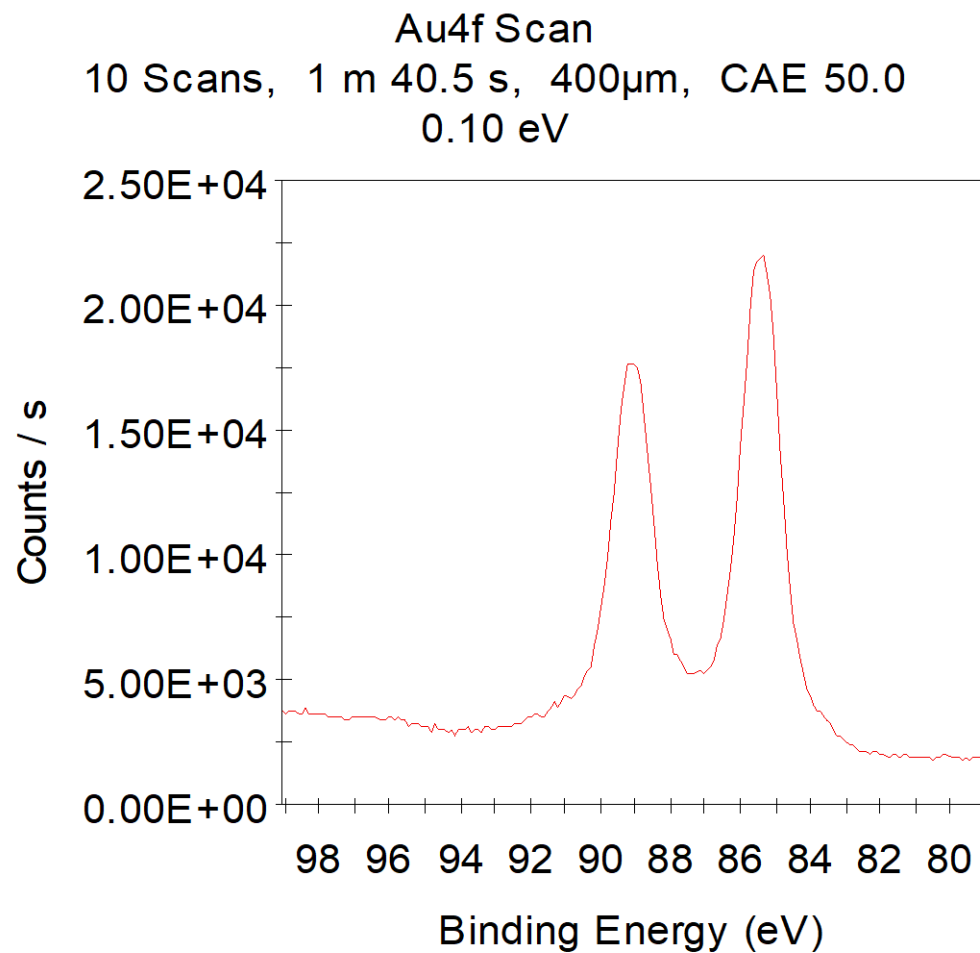

## X-ray Crystallography Data

Table S5. Crystal data and structure refinement for 5l

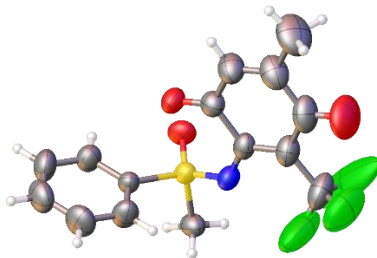

Compound 5l (CCDC 2294386)

|                                             |                                                                  |
|---------------------------------------------|------------------------------------------------------------------|
| Identification code                         | 5L                                                               |
| Empirical formula                           | C <sub>15</sub> H <sub>13</sub> F <sub>3</sub> NO <sub>3</sub> S |
| Formula weight                              | 344.337                                                          |
| Temperature/K                               | 200.00                                                           |
| Crystal system                              | monoclinic                                                       |
| Space group                                 | P2 <sub>1</sub> /n                                               |
| a/Å                                         | 5.624(4)                                                         |
| b/Å                                         | 25.714(14)                                                       |
| c/Å                                         | 11.107(5)                                                        |
| $\alpha$ /°                                 | 90                                                               |
| $\beta$ /°                                  | 103.105(19)                                                      |
| $\gamma$ /°                                 | 90                                                               |
| Volume/Å <sup>3</sup>                       | 1564.5(15)                                                       |
| Z                                           | 4                                                                |
| $\rho$ <sub>calc</sub> /cm <sup>3</sup>     | 1.462                                                            |
| $\mu$ /mm <sup>-1</sup>                     | 0.252                                                            |
| F(000)                                      | 709.1                                                            |
| Crystal size/mm <sup>3</sup>                | 0.2 × 0.19 × 0.168                                               |
| Radiation                                   | Mo K $\alpha$ ( $\lambda$ = 0.71073)                             |
| 2 $\theta$ range for data collection/°      | 4.92 to 56.74                                                    |
| Index ranges                                | -7 ≤ h ≤ 7, -34 ≤ k ≤ 34, -14 ≤ l ≤ 14                           |
| Reflections collected                       | 36690                                                            |
| Independent reflections                     | 3864 [R <sub>int</sub> = 0.0921, R <sub>sigma</sub> = 0.0523]    |
| Data/restraints/parameters                  | 3864/0/210                                                       |
| Goodness-of-fit on F <sup>2</sup>           | 1.055                                                            |
| Final R indexes [I >= 2 $\sigma$ (I)]       | R <sub>1</sub> = 0.0954, wR <sub>2</sub> = 0.2433                |
| Final R indexes [all data]                  | R <sub>1</sub> = 0.1198, wR <sub>2</sub> = 0.2534                |
| Largest diff. peak/hole / e Å <sup>-3</sup> | 0.86/-0.57                                                       |
